# Supplementary material for: Single-Atom Electronic Bridge Facilitates Cascade Charge Transfer from Encapsulated Polyoxometalate to Metal-Organic Framework for Efficient Photocatalytic CO2 Conversion
Source: Research Square preprint supplement (doi:10.21203/rs.3.rs-6379856/v1), 2025-05-14
Supplement: Supplementary file 1 [file b43f1534042a8a2c00dfd272.xlsx]

## Sheet: Figure 1e
Ni/POM@MOF									POM@MOF
Raw	Intensity	Peak	Sum	Background	Peak	1	Peak		B.E.	Intensity
5165.62	5174.43	5165.62	5166.44	5166.86	5166.67	5171.34	-8.80176		894	5903.12
5490.62	5175.66	5166.75	5167.57	5167.99	5167.8	5172.55	314.964		893.9	5859.38
5206.25	5176.9	5167.87	5168.7	5169.13	5168.93	5173.76	29.353		893.8	5875
5218.75	5178.14	5169	5169.83	5170.26	5170.06	5174.97	40.6143		893.7	5740.62
5221.88	5179.38	5170.12	5170.95	5171.4	5171.19	5176.19	42.4985		893.6	5828.12
5162.5	5180.62	5171.24	5172.08	5172.54	5172.32	5177.41	-18.1206		893.5	5896.88
5296.88	5181.87	5172.37	5173.21	5173.67	5173.45	5178.63	115.009		893.4	6234.38
5531.25	5183.12	5173.49	5174.34	5174.81	5174.58	5179.85	348.134		893.3	6015.62
5340.62	5184.37	5174.61	5175.47	5175.95	5175.71	5181.08	156.258		893.2	5921.88
5250	5185.62	5175.74	5176.6	5177.08	5176.84	5182.31	64.3789		893.1	5612.5
5256.25	5186.88	5176.86	5177.72	5178.22	5177.97	5183.54	69.3721		893	5843.75
5400	5188.14	5177.98	5178.85	5179.36	5179.1	5184.77	211.862		892.9	5950
5150	5189.4	5179.11	5179.98	5180.5	5180.24	5186.01	-39.4009		892.8	5831.25
5165.62	5190.67	5180.23	5181.11	5181.63	5181.37	5187.25	-25.0415		892.7	5840.62
5240.62	5191.94	5181.35	5182.24	5182.77	5182.5	5188.49	48.689		892.6	5934.38
5221.88	5193.21	5182.48	5183.36	5183.91	5183.63	5189.74	28.6655		892.5	6037.5
5309.38	5194.48	5183.6	5184.49	5185.05	5184.76	5190.98	114.89		892.4	5881.25
5375	5195.77	5184.73	5185.62	5186.19	5185.89	5192.24	179.235		892.3	5806.25
5518.75	5197.05	5185.85	5186.75	5187.33	5187.02	5193.49	321.702		892.2	5821.88
5431.25	5198.34	5186.97	5187.88	5188.47	5188.16	5194.75	232.914		892.1	5868.75
5443.75	5199.63	5188.1	5189.01	5189.6	5189.29	5196.01	244.124		892	5987.5
5403.12	5200.92	5189.22	5190.14	5190.75	5190.42	5197.28	202.203		891.9	5871.88
5381.25	5202.22	5190.34	5191.26	5191.89	5191.55	5198.55	179.029		891.8	5765.62
5318.75	5203.52	5191.47	5192.39	5193.03	5192.69	5199.82	115.225		891.7	5881.25
5343.75	5204.83	5192.59	5193.52	5194.17	5193.82	5201.1	138.917		891.6	5896.88
5403.12	5206.15	5193.71	5194.65	5195.31	5194.95	5202.38	196.98		891.5	5762.5
5309.38	5207.46	5194.84	5195.78	5196.45	5196.08	5203.66	101.912		891.4	5868.75
5346.88	5208.79	5195.96	5196.91	5197.59	5197.22	5204.95	138.089		891.3	5681.25
5353.12	5210.11	5197.08	5198.04	5198.73	5198.35	5206.25	143.012		891.2	5671.88
5296.88	5211.45	5198.21	5199.17	5199.88	5199.48	5207.55	85.4287		891.1	5784.38
5403.12	5212.78	5199.33	5200.3	5201.02	5200.61	5208.85	190.34		891	5975
5459.38	5214.13	5200.45	5201.42	5202.16	5201.75	5210.16	245.246		890.9	5865.62
5621.88	5215.48	5201.58	5202.55	5203.3	5202.88	5211.48	406.396		890.8	5718.75
5340.62	5216.84	5202.7	5203.68	5204.45	5204.01	5212.8	123.79		890.7	5687.5
5378.12	5218.2	5203.82	5204.81	5205.59	5205.15	5214.12	159.927		890.6	6071.88
5584.38	5219.57	5204.95	5205.94	5206.73	5206.28	5215.46	364.807		890.5	5893.75
5525	5220.94	5206.07	5207.07	5207.88	5207.41	5216.8	304.055		890.4	5878.12
5465.62	5222.33	5207.19	5208.2	5209.02	5208.55	5218.14	243.296		890.3	5706.25
5437.5	5223.72	5208.32	5209.33	5210.17	5209.68	5219.5	213.779		890.2	5878.12
5428.12	5225.12	5209.44	5210.46	5211.31	5210.81	5220.86	203.005		890.1	5875
5253.12	5226.53	5210.56	5211.59	5212.46	5211.95	5222.23	26.5967		890	6253.12
5403.12	5227.94	5211.69	5212.72	5213.61	5213.08	5223.6	175.18		889.9	5615.62
5300	5229.37	5212.81	5213.85	5214.75	5214.22	5224.99	70.6289		889.8	5946.88
5134.38	5230.81	5213.94	5214.98	5215.9	5215.35	5226.39	-96.4316		889.7	5925
5290.62	5232.25	5215.06	5216.11	5217.05	5216.48	5227.79	58.3721		889.6	5956.25
5521.88	5233.71	5216.18	5217.24	5218.2	5217.62	5229.2	288.166		889.5	5859.38
5440.62	5235.18	5217.31	5218.37	5219.35	5218.75	5230.63	205.449		889.4	5925
5053.12	5236.65	5218.43	5219.5	5220.49	5219.89	5232.06	-183.53		889.3	5612.5
5181.25	5238.15	5219.55	5220.63	5221.64	5221.02	5233.51	-56.8965		889.2	6059.38
5478.12	5239.65	5220.68	5221.76	5222.79	5222.16	5234.97	238.474		889.1	5990.62
5281.25	5241.17	5221.8	5222.89	5223.94	5223.3	5236.44	40.0806		889	5709.38
5390.62	5242.7	5222.92	5224.02	5225.1	5224.43	5237.93	147.923		888.9	5843.75
5293.75	5244.25	5224.05	5225.15	5226.25	5225.57	5239.43	49.5005		888.8	5909.38
5215.62	5245.81	5225.17	5226.28	5227.4	5226.7	5240.95	-30.188		888.7	5978.12
5265.62	5247.39	5226.29	5227.41	5228.55	5227.84	5242.48	18.2314		888.6	5871.88
5178.12	5248.99	5227.42	5228.54	5229.71	5228.97	5244.03	-70.8672		888.5	6084.38
5603.12	5250.61	5228.54	5229.67	5230.86	5230.11	5245.6	352.515		888.4	6121.88
5271.88	5252.25	5229.66	5230.8	5232.01	5231.24	5247.19	19.627		888.3	5784.38
5478.12	5253.91	5230.79	5231.93	5233.17	5232.38	5248.79	224.218		888.2	5562.5
5450	5255.59	5231.91	5233.06	5234.32	5233.52	5250.42	194.411		888.1	5781.25
5459.38	5257.3	5233.04	5234.19	5235.48	5234.65	5252.07	202.08		888	5953.12
5325	5259.03	5234.16	5235.32	5236.64	5235.79	5253.75	65.9736		887.9	5728.12
5493.75	5260.78	5235.28	5236.45	5237.8	5236.93	5255.45	232.966		887.8	6015.62
5306.25	5262.57	5236.41	5237.58	5238.95	5238.07	5257.19	43.6792		887.7	6187.5
5156.25	5264.39	5237.53	5238.71	5240.11	5239.2	5258.94	-108.138		887.6	5890.62
5171.88	5266.23	5238.65	5239.85	5241.27	5240.34	5260.73	-94.3603		887.5	5675
5378.12	5268.12	5239.78	5240.98	5242.44	5241.48	5262.56	110.007		887.4	5681.25
5240.62	5270.04	5240.9	5242.11	5243.6	5242.62	5264.42	-29.4111		887.3	6003.12
5384.38	5271.99	5242.02	5243.24	5244.76	5243.76	5266.31	112.384		887.2	5796.88
5296.88	5273.99	5243.15	5244.37	5245.92	5244.89	5268.24	22.8877		887.1	5765.62
5325	5276.02	5244.27	5245.5	5247.09	5246.03	5270.22	48.9756		887	5790.62
5340.62	5278.1	5245.4	5246.63	5248.25	5247.17	5272.23	62.5195		886.9	6184.38
5431.25	5280.23	5246.52	5247.77	5249.42	5248.31	5274.3	151.015		886.8	5696.88
5328.12	5282.41	5247.64	5248.9	5250.58	5249.45	5276.41	45.7119		886.7	5903.12
5403.12	5284.64	5248.77	5250.03	5251.75	5250.59	5278.57	118.482		886.6	5590.62
5346.88	5286.93	5249.89	5251.16	5252.92	5251.73	5280.78	59.9482		886.5	5996.88
5490.62	5289.27	5251.01	5252.29	5254.09	5252.87	5283.06	201.356		886.4	5859.38
5340.62	5291.67	5252.14	5253.42	5255.26	5254.01	5285.39	48.9541		886.3	6290.62
5371.88	5294.14	5253.26	5254.56	5256.43	5255.15	5287.77	77.7398		886.2	5721.88
5315.62	5296.67	5254.38	5255.69	5257.61	5256.29	5290.23	18.958		886.1	5887.5
5375	5299.27	5255.51	5256.82	5258.78	5257.43	5292.75	75.7344		886	5859.38
5328.12	5301.94	5256.63	5257.95	5259.96	5258.57	5295.35	26.1875		885.9	5931.25
5587.5	5304.68	5257.75	5259.09	5261.13	5259.71	5298.02	282.816		885.8	5843.75
5368.75	5307.51	5258.88	5260.22	5262.31	5260.85	5300.76	61.2427		885.7	5978.12
5612.5	5310.41	5260	5261.35	5263.49	5261.99	5303.58	302.086		885.6	5975
5509.38	5313.4	5261.12	5262.48	5264.67	5263.14	5306.48	195.973		885.5	5956.25
5371.88	5316.48	5262.25	5263.62	5265.85	5264.28	5309.47	55.397		885.4	5940.62
5346.88	5319.65	5263.37	5264.75	5267.04	5265.42	5312.55	27.2305		885.3	6231.25
5556.25	5322.9	5264.49	5265.88	5268.22	5266.56	5315.72	233.348		885.2	5821.88
5578.12	5326.26	5265.62	5267.02	5269.41	5267.7	5318.98	251.869		885.1	6275
5346.88	5329.71	5266.74	5268.15	5270.6	5268.85	5322.34	17.167		885	6009.38
5231.25	5333.26	5267.86	5269.28	5271.78	5269.99	5325.8	-102.008		884.9	5906.25
5362.5	5336.91	5268.99	5270.41	5272.98	5271.14	5329.35	25.5869		884.8	5771.88
5390.62	5340.67	5270.11	5271.55	5274.17	5272.28	5333.01	49.9541		884.7	6090.62
5575	5344.54	5271.23	5272.68	5275.36	5273.42	5336.77	230.464		884.6	6168.75
5521.88	5348.51	5272.36	5273.81	5276.56	5274.57	5340.64	173.369		884.5	5968.75
5634.38	5352.59	5273.48	5274.95	5277.76	5275.71	5344.61	281.79		884.4	5850
5303.12	5356.77	5274.6	5276.08	5278.96	5276.86	5348.69	-53.6489		884.3	5971.88
5637.5	5361.07	5275.73	5277.22	5280.16	5278	5352.87	276.432		884.2	5965.62
5525	5365.47	5276.85	5278.35	5281.37	5279.15	5357.16	159.527		884.1	6025
5403.12	5369.98	5277.98	5279.49	5282.58	5280.3	5361.55	33.144		884	5968.75
5412.5	5374.59	5279.1	5280.62	5283.78	5281.44	5366.04	37.9082		883.9	6140.62
5215.62	5379.3	5280.22	5281.76	5285	5282.59	5370.63	-163.679		883.8	6065.62
5337.5	5384.11	5281.35	5282.89	5286.21	5283.73	5375.31	-46.6099		883.7	5946.88
5562.5	5389.01	5282.47	5284.02	5287.43	5284.88	5380.08	173.493		883.6	6075
5203.12	5393.98	5283.59	5285.16	5288.65	5286.03	5384.93	-190.857		883.5	5934.38
5331.25	5399.03	5284.72	5286.29	5289.87	5287.18	5389.84	-67.7803		883.4	6200
5418.75	5404.14	5285.84	5287.43	5291.1	5288.33	5394.81	14.6079		883.3	6125
5484.38	5409.3	5286.96	5288.56	5292.33	5289.48	5399.83	75.0742		883.2	6015.62
5306.25	5414.5	5288.09	5289.7	5293.56	5290.63	5404.88	-108.246		883.1	5806.25
5234.38	5419.7	5289.21	5290.84	5294.79	5291.77	5409.94	-185.329		883	6006.25
5434.38	5424.91	5290.34	5291.97	5296.03	5292.93	5414.99	9.46533		882.9	6003.12
5290.62	5430.09	5291.46	5293.11	5297.27	5294.08	5420.01	-139.467		882.8	5859.38
5478.12	5435.22	5292.58	5294.24	5298.52	5295.23	5424.98	42.9014		882.7	6134.38
5515.62	5440.28	5293.71	5295.38	5299.77	5296.38	5429.87	75.3442		882.6	6112.5
5446.88	5445.23	5294.83	5296.52	5301.02	5297.53	5434.65	1.64502		882.5	6121.88
5500	5450.04	5295.95	5297.65	5302.28	5298.68	5439.29	49.9575		882.4	5931.25
5471.88	5454.69	5297.08	5298.79	5303.54	5299.84	5443.75	17.186		882.3	6196.88
5653.12	5459.13	5298.2	5299.92	5304.81	5300.99	5448.01	193.994		882.2	6062.5
5193.75	5463.34	5299.32	5301.06	5306.07	5302.14	5452.03	-269.59		882.1	6375
5459.38	5467.28	5300.45	5302.2	5307.35	5303.3	5455.77	-7.90381		882	6003.12
5587.5	5470.92	5301.57	5303.34	5308.63	5304.45	5459.21	116.582		881.9	6393.75
5428.12	5474.23	5302.69	5304.47	5309.92	5305.61	5462.31	-46.103		881.8	5840.62
5496.88	5477.18	5303.82	5305.61	5311.21	5306.76	5465.05	19.6929		881.7	6184.38
5359.38	5479.76	5304.94	5306.75	5312.51	5307.92	5467.41	-120.383		881.6	6015.62
5268.75	5481.94	5306.06	5307.89	5313.81	5309.07	5469.36	-213.189		881.5	5812.5
5500	5483.71	5307.19	5309.02	5315.12	5310.23	5470.9	16.2876		881.4	6153.12
5465.62	5485.07	5308.31	5310.16	5316.44	5311.39	5472.02	-19.4477		881.3	6225
5484.38	5486.02	5309.44	5311.3	5317.76	5312.55	5472.71	-1.646		881.2	6162.5
5525	5486.56	5310.56	5312.44	5319.09	5313.71	5473	38.4365		881.1	6053.12
5728.12	5486.71	5311.68	5313.58	5320.43	5314.87	5472.88	241.412		881	6303.12
5512.5	5486.49	5312.81	5314.72	5321.78	5316.03	5472.38	26.0122		880.9	6240.62
5593.75	5485.91	5313.93	5315.85	5323.14	5317.19	5471.51	107.841		880.8	5875
5431.25	5485.01	5315.05	5316.99	5324.5	5318.35	5470.32	-53.7573		880.7	6431.25
5493.75	5483.81	5316.18	5318.13	5325.88	5319.51	5468.81	9.94092		880.6	5906.25
5440.62	5482.35	5317.3	5319.27	5327.26	5320.68	5467.04	-41.7261		880.5	5856.25
5512.5	5480.66	5318.42	5320.41	5328.66	5321.84	5465.02	31.8355		880.4	5978.12
5531.25	5478.78	5319.55	5321.55	5330.07	5323	5462.8	52.4673		880.3	5971.88
5646.88	5476.74	5320.67	5322.69	5331.49	5324.17	5460.4	170.132		880.2	6256.25
5512.5	5474.58	5321.79	5323.83	5332.92	5325.34	5457.86	37.9238		880.1	6018.75
5237.5	5472.32	5322.92	5324.97	5334.37	5326.5	5455.22	-234.816		880	6090.62
5468.75	5469.99	5324.04	5326.11	5335.83	5327.67	5452.5	-1.24219		879.9	6140.62
5356.25	5467.63	5325.16	5327.26	5337.31	5328.84	5449.72	-111.38		879.8	6009.38
5281.25	5465.26	5326.29	5328.4	5338.81	5330.01	5446.91	-184.01		879.7	5937.5
5309.38	5462.9	5327.41	5329.54	5340.32	5331.18	5444.1	-153.525		879.6	5875
5756.25	5460.58	5328.53	5330.68	5341.85	5332.35	5441.3	295.673		879.5	6009.38
5506.25	5458.31	5329.66	5331.82	5343.41	5333.52	5438.53	47.9438		879.4	5718.75
5793.75	5456.1	5330.78	5332.96	5344.98	5334.69	5435.81	337.647		879.3	5912.5
5306.25	5453.98	5331.9	5334.11	5346.59	5335.86	5433.14	-147.735		879.2	5915.62
5481.25	5451.96	5333.03	5335.25	5348.21	5337.04	5430.54	29.2871		879.1	6043.75
5496.88	5450.05	5334.15	5336.39	5349.87	5338.22	5428.03	46.8242		879	5990.62
5603.12	5448.26	5335.27	5337.53	5351.56	5339.39	5425.6	154.87		878.9	6046.88
5456.25	5446.59	5336.4	5338.68	5353.28	5340.57	5423.26	9.66455		878.8	6187.5
5556.25	5445.05	5337.52	5339.82	5355.03	5341.75	5421.02	111.2		878.7	5890.62
5584.38	5443.65	5338.65	5340.97	5356.82	5342.93	5418.87	140.721		878.6	6146.88
5425	5442.4	5339.77	5342.11	5358.66	5344.11	5416.84	-17.4048		878.5	6225
5512.5	5441.31	5340.89	5343.26	5360.54	5345.29	5414.9	71.1953		878.4	6071.88
5659.38	5440.36	5342.02	5344.4	5362.46	5346.47	5413.07	219.016		878.3	5853.12
5265.62	5439.57	5343.14	5345.54	5364.44	5347.66	5411.35	-173.947		878.2	6040.62
5353.12	5438.95	5344.26	5346.69	5366.47	5348.84	5409.73	-85.8223		878.1	6109.38
5350	5438.49	5345.39	5347.84	5368.56	5350.03	5408.22	-88.4893		878	6143.75
5553.12	5438.2	5346.51	5348.98	5370.72	5351.22	5406.81	114.926		877.9	5812.5
5281.25	5438.08	5347.63	5350.13	5372.94	5352.41	5405.5	-156.831		877.8	6109.38
5434.38	5438.14	5348.76	5351.27	5375.24	5353.6	5404.3	-3.76074		877.7	6093.75
5334.38	5438.37	5349.88	5352.42	5377.61	5354.79	5403.19	-103.994		877.6	6190.62
5462.5	5438.78	5351	5353.57	5380.06	5355.98	5402.18	23.7188		877.5	6050
5771.88	5439.38	5352.13	5354.72	5382.61	5357.18	5401.26	332.499		877.4	6021.88
5659.38	5440.16	5353.25	5355.86	5385.24	5358.38	5400.43	219.219		877.3	6037.5
5490.62	5441.12	5354.38	5357.01	5387.97	5359.57	5399.69	49.501		877.2	6093.75
5443.75	5442.28	5355.5	5358.16	5390.81	5360.77	5399.03	1.46826		877.1	6040.62
5375	5443.63	5356.62	5359.31	5393.75	5361.98	5398.46	-68.6328		877	5996.88
5737.5	5445.18	5357.75	5360.46	5396.81	5363.18	5397.97	292.32		876.9	5909.38
5446.88	5446.93	5358.87	5361.61	5399.99	5364.38	5397.55	-0.05029		876.8	5768.75
5559.38	5448.87	5359.99	5362.76	5403.29	5365.59	5397.21	110.505		876.7	6150
5209.38	5451.02	5361.12	5363.91	5406.73	5366.8	5396.93	-241.642		876.6	6062.5
5575	5453.37	5362.24	5365.06	5410.3	5368.01	5396.72	121.631		876.5	5931.25
5446.88	5455.93	5363.36	5366.21	5414	5369.22	5396.58	-9.05127		876.4	5853.12
5593.75	5458.69	5364.49	5367.36	5417.85	5370.44	5396.5	135.058		876.3	6146.88
5690.62	5461.66	5365.61	5368.52	5421.85	5371.65	5396.48	228.961		876.2	6159.38
5737.5	5464.85	5366.73	5369.67	5426	5372.87	5396.51	272.655		876.1	5837.5
5353.12	5468.23	5367.86	5370.82	5430.29	5374.09	5396.6	-115.107		876	5990.62
5421.88	5471.82	5368.98	5371.97	5434.74	5375.31	5396.73	-49.9492		875.9	6156.25
5521.88	5475.62	5370.1	5373.13	5439.34	5376.54	5396.92	46.2544		875.8	6200
5471.88	5479.61	5371.23	5374.28	5444.09	5377.77	5397.15	-7.73682		875.7	6050
5643.75	5483.8	5372.35	5375.44	5448.99	5379	5397.43	159.953		875.6	5915.62
5559.38	5488.16	5373.48	5376.59	5454.02	5380.23	5397.74	71.2114		875.5	6081.25
5468.75	5492.7	5374.6	5377.75	5459.18	5381.47	5398.09	-23.9502		875.4	5878.12
5643.75	5497.4	5375.72	5378.9	5464.46	5382.71	5398.48	146.353		875.3	6046.88
5437.5	5502.23	5376.85	5380.06	5469.85	5383.95	5398.91	-64.7314		875.2	5987.5
5600	5507.19	5377.97	5381.22	5475.31	5385.2	5399.37	92.814		875.1	6009.38
5437.5	5512.23	5379.09	5382.38	5480.83	5386.44	5399.85	-74.73		875	6031.25
5593.75	5517.33	5380.22	5383.53	5486.38	5387.69	5400.37	76.4155		874.9	5903.12
5687.5	5522.47	5381.34	5384.69	5491.92	5388.95	5400.92	165.035		874.8	6009.38
5787.5	5527.57	5382.46	5385.85	5497.41	5390.21	5401.49	259.925		874.7	5834.38
5596.88	5532.62	5383.59	5387.01	5502.81	5391.47	5402.08	64.2544		874.6	6090.62
5443.75	5537.55	5384.71	5388.17	5508.07	5392.73	5402.7	-93.7949		874.5	6281.25
5803.12	5542.29	5385.83	5389.34	5513.11	5394	5403.34	260.832		874.4	6096.88
5578.12	5546.81	5386.96	5390.5	5517.9	5395.27	5404	31.3198		874.3	6096.88
5240.62	5551.02	5388.08	5391.66	5522.36	5396.55	5404.68	-310.39		874.2	6237.5
5659.38	5554.86	5389.2	5392.82	5526.44	5397.83	5405.38	104.51		874.1	5903.12
5721.88	5558.29	5390.33	5393.99	5530.08	5399.12	5406.09	163.583		874	5978.12
5778.12	5561.24	5391.45	5395.15	5533.21	5400.41	5406.83	216.882		873.9	6159.38
5328.12	5563.68	5392.57	5396.32	5535.81	5401.7	5407.57	-235.552		873.8	6075
5575	5565.55	5393.7	5397.48	5537.83	5403	5408.33	9.44678		873.7	6128.12
5418.75	5566.85	5394.82	5398.65	5539.26	5404.3	5409.11	-148.105		873.6	6128.12
5546.88	5567.57	5395.94	5399.81	5540.08	5405.61	5409.9	-20.6953		873.5	6121.88
5456.25	5567.71	5397.07	5400.98	5540.31	5406.93	5410.7	-111.46		873.4	6090.62
5296.88	5567.29	5398.19	5402.15	5539.96	5408.25	5411.51	-270.416		873.3	6071.88
5593.75	5566.35	5399.31	5403.32	5539.07	5409.58	5412.33	27.4004		873.2	6071.88
5571.88	5564.93	5400.44	5404.49	5537.68	5410.91	5413.16	6.94678		873.1	5996.88
5331.25	5563.08	5401.56	5405.66	5535.85	5412.25	5414.01	-231.832		873	6093.75
5384.38	5560.87	5402.69	5406.84	5533.63	5413.6	5414.86	-176.494		872.9	6043.75
5575	5558.35	5403.81	5408.01	5531.09	5414.95	5415.72	16.6543		872.8	6065.62
5459.38	5555.58	5404.93	5409.18	5528.29	5416.31	5416.59	-96.2046		872.7	6143.75
5356.25	5552.62	5406.06	5410.36	5525.29	5417.68	5417.47	-196.375		872.6	6250
5487.5	5549.54	5407.18	5411.53	5522.14	5419.06	5418.35	-62.044		872.5	6071.88
5512.5	5546.39	5408.3	5412.71	5518.89	5420.45	5419.25	-33.8848		872.4	6300
5559.38	5543.19	5409.43	5413.89	5515.59	5421.85	5420.15	16.1831		872.3	5818.75
5700	5540.01	5410.55	5415.07	5512.29	5423.25	5421.06	159.988		872.2	6059.38
5646.88	5536.87	5411.67	5416.25	5509.02	5424.67	5421.97	110.001		872.1	6071.88
5687.5	5533.81	5412.8	5417.43	5505.8	5426.09	5422.89	153.685		872	6084.38
5571.88	5530.85	5413.92	5418.61	5502.67	5427.53	5423.81	41.021		871.9	6271.88
5778.12	5528.01	5415.04	5419.79	5499.63	5428.98	5424.75	250.113		871.8	5996.88
5512.5	5525.31	5416.17	5420.97	5496.72	5430.44	5425.68	-12.8096		871.7	5809.38
5753.12	5522.75	5417.29	5422.16	5493.93	5431.92	5426.63	230.371		871.6	5909.38
5612.5	5520.36	5418.41	5423.35	5491.28	5433.4	5427.57	92.1411		871.5	6078.12
5412.5	5518.13	5419.54	5424.53	5488.78	5434.91	5428.53	-105.63		871.4	6196.88
5537.5	5516.07	5420.66	5425.72	5486.42	5436.43	5429.48	21.4292		871.3	6093.75
5578.12	5514.19	5421.79	5426.91	5484.22	5437.96	5430.44	63.9385		871.2	6090.62
5406.25	5512.48	5422.91	5428.1	5482.17	5439.52	5431.41	-106.225		871.1	6153.12
5681.25	5510.94	5424.03	5429.3	5480.27	5441.09	5432.38	170.309		871	6137.5
5759.38	5509.58	5425.16	5430.49	5478.52	5442.68	5433.35	249.793		870.9	6046.88
5331.25	5508.39	5426.28	5431.69	5476.92	5444.3	5434.33	-177.144		870.8	5890.62
5484.38	5507.38	5427.4	5432.88	5475.46	5445.93	5435.31	-23.002		870.7	6184.38
5587.5	5506.53	5428.53	5434.08	5474.14	5447.59	5436.3	80.9722		870.6	5978.12
5381.25	5505.84	5429.65	5435.28	5472.95	5449.27	5437.29	-124.593		870.5	6103.12
5715.62	5505.32	5430.77	5436.48	5471.9	5450.98	5438.28	210.305		870.4	6118.75
5346.88	5504.95	5431.9	5437.68	5470.96	5452.72	5439.28	-158.079		870.3	6184.38
5553.12	5504.74	5433.02	5438.89	5470.15	5454.48	5440.28	48.3823		870.2	6200
5434.38	5504.68	5434.15	5440.1	5469.45	5456.28	5441.28	-70.3052		870.1	6062.5
5559.38	5504.77	5435.27	5441.3	5468.87	5458.11	5442.28	54.6099		870	6121.88
5496.88	5504.99	5436.39	5442.51	5468.38	5459.98	5443.29	-8.11768		869.9	5971.88
5603.12	5505.36	5437.52	5443.73	5467.99	5461.88	5444.3	97.7661		869.8	6225
5431.25	5505.86	5438.64	5444.94	5467.7	5463.82	5445.32	-74.6123		869.7	6212.5
5621.88	5506.5	5439.76	5446.15	5467.49	5465.81	5446.33	115.377		869.6	6012.5
5640.62	5507.26	5440.89	5447.37	5467.37	5467.83	5447.35	133.362		869.5	5990.62
5390.62	5508.16	5442.01	5448.59	5467.32	5469.9	5448.37	-117.531		869.4	6106.25
5650	5509.17	5443.13	5449.81	5467.34	5472.02	5449.4	140.828		869.3	6125
5634.38	5510.31	5444.26	5451.04	5467.44	5474.19	5450.42	124.063		869.2	6109.38
5440.62	5511.57	5445.38	5452.26	5467.59	5476.41	5451.45	-70.9473		869.1	5971.88
5309.38	5512.95	5446.5	5453.49	5467.81	5478.68	5452.48	-203.576		869	6109.38
5840.62	5514.45	5447.63	5454.72	5468.07	5481.02	5453.51	326.179		868.9	5790.62
5537.5	5516.06	5448.75	5455.96	5468.4	5483.41	5454.55	21.4424		868.8	6350
5568.75	5517.78	5449.87	5457.19	5468.76	5485.87	5455.58	50.9653		868.7	6218.75
5359.38	5519.63	5451	5458.43	5469.18	5488.39	5456.62	-160.252		868.6	6178.12
5612.5	5521.58	5452.12	5459.67	5469.63	5490.98	5457.66	90.9185		868.5	5950
5775	5523.65	5453.24	5460.92	5470.12	5493.64	5458.7	251.35		868.4	6571.88
5659.38	5525.83	5454.37	5462.16	5470.65	5496.38	5459.75	133.542		868.3	6071.88
5471.88	5528.13	5455.49	5463.41	5471.21	5499.19	5460.79	-56.2554		868.2	6178.12
5534.38	5530.54	5456.61	5464.67	5471.8	5502.08	5461.84	3.8335		868.1	6262.5
5678.12	5533.07	5457.74	5465.92	5472.42	5505.05	5462.89	145.058		868	6246.88
5525	5535.71	5458.86	5467.18	5473.06	5508.11	5463.94	-10.706		867.9	6184.38
5540.62	5538.46	5459.98	5468.45	5473.73	5511.25	5464.99	2.16211		867.8	6212.5
5587.5	5541.33	5461.11	5469.71	5474.43	5514.48	5466.04	46.1655		867.7	6050
5671.88	5544.32	5462.23	5470.98	5475.14	5517.8	5467.1	127.551		867.6	6225
5428.12	5547.43	5463.35	5472.26	5475.87	5521.21	5468.15	-119.304		867.5	5903.12
5475	5550.65	5464.48	5473.53	5476.63	5524.72	5469.21	-75.6523		867.4	6300
5612.5	5553.99	5465.6	5474.81	5477.39	5528.32	5470.27	58.5059		867.3	5984.38
5521.88	5557.45	5466.73	5476.1	5478.18	5532.02	5471.33	-35.5776		867.2	6171.88
5890.62	5561.03	5467.85	5477.39	5478.98	5535.82	5472.39	329.594		867.1	6221.88
5440.62	5564.72	5468.97	5478.69	5479.79	5539.71	5473.45	-124.099		867	6059.38
5596.88	5568.53	5470.1	5479.98	5480.62	5543.7	5474.52	28.3423		866.9	5918.75
5665.62	5572.46	5471.22	5481.29	5481.46	5547.79	5475.58	93.167		866.8	6350
5631.25	5576.49	5472.34	5482.6	5482.31	5551.97	5476.65	54.7573		866.7	6006.25
5996.88	5580.64	5473.47	5483.91	5483.17	5556.25	5477.72	416.235		866.6	5906.25
5684.38	5584.89	5474.59	5485.23	5484.04	5560.61	5478.78	99.4844		866.5	6112.5
5612.5	5589.24	5475.71	5486.55	5484.92	5565.06	5479.85	23.2588		866.4	6343.75
5715.62	5593.69	5476.84	5487.88	5485.81	5569.59	5480.92	121.935		866.3	5790.62
5321.88	5598.23	5477.96	5489.22	5486.71	5574.19	5481.99	-276.351		866.2	6418.75
5593.75	5602.84	5479.09	5490.56	5487.62	5578.85	5483.07	-9.09229		866.1	6190.62
5840.62	5607.53	5480.21	5491.91	5488.54	5583.57	5484.14	233.098		866	6115.62
5887.5	5612.27	5481.33	5493.26	5489.46	5588.33	5485.22	275.23		865.9	5878.12
5587.5	5617.06	5482.46	5494.62	5490.39	5593.12	5486.29	-29.5605		865.8	6190.62
5446.88	5621.88	5483.58	5495.99	5491.33	5597.93	5487.37	-175.002		865.7	6090.62
5584.38	5626.71	5484.7	5497.36	5492.27	5602.74	5488.44	-42.3335		865.6	6143.75
5665.62	5631.53	5485.83	5498.75	5493.22	5607.52	5489.52	34.0942		865.5	6087.5
5562.5	5636.32	5486.95	5500.14	5494.17	5612.26	5490.6	-73.8232		865.4	5881.25
5503.12	5641.06	5488.07	5501.54	5495.14	5616.93	5491.68	-137.94		865.3	6562.5
5881.25	5645.73	5489.2	5502.95	5496.1	5621.51	5492.76	235.523		865.2	6281.25
5628.12	5650.28	5490.32	5504.36	5497.07	5625.97	5493.84	-22.1582		865.1	6056.25
5700	5654.7	5491.44	5505.79	5498.05	5630.27	5494.92	45.2959		865	6378.12
5634.38	5658.96	5492.57	5507.23	5499.03	5634.4	5496	-24.584		864.9	6056.25
5615.62	5663.02	5493.69	5508.67	5500.02	5638.32	5497.09	-47.396		864.8	6125
5643.75	5666.86	5494.81	5510.13	5501.01	5641.99	5498.17	-23.1064		864.7	6303.12
5556.25	5670.44	5495.94	5511.6	5502	5645.4	5499.26	-114.189		864.6	6409.38
5590.62	5673.74	5497.06	5513.08	5503	5648.51	5500.34	-83.1148		864.5	6325
5593.75	5676.73	5498.19	5514.57	5504	5651.29	5501.43	-82.9834		864.4	6150
5721.88	5679.4	5499.31	5516.08	5505	5653.73	5502.51	42.4736		864.3	6375
5734.38	5681.72	5500.43	5517.6	5506.01	5655.81	5503.6	52.6519		864.2	6346.88
5615.62	5683.69	5501.56	5519.13	5507.02	5657.51	5504.69	-68.0615		864.1	6306.25
5637.5	5685.28	5502.68	5520.68	5508.04	5658.83	5505.78	-47.7852		864	6125
5409.38	5686.52	5503.8	5522.24	5509.06	5659.76	5506.87	-277.142		863.9	6325
5381.25	5687.38	5504.93	5523.82	5510.08	5660.3	5507.95	-306.134		863.8	6131.25
5603.12	5687.9	5506.05	5525.42	5511.1	5660.47	5509.05	-84.7715		863.7	6303.12
5725	5688.07	5507.17	5527.04	5512.13	5660.28	5510.14	36.9321		863.6	6243.75
5637.5	5687.92	5508.3	5528.68	5513.16	5659.74	5511.23	-50.4175		863.5	6156.25
5721.88	5687.47	5509.42	5530.33	5514.19	5658.88	5512.32	34.4058		863.4	6053.12
5712.5	5686.75	5510.54	5532.02	5515.23	5657.72	5513.41	25.7539		863.3	6093.75
5640.62	5685.78	5511.67	5533.72	5516.27	5656.29	5514.5	-45.1567		863.2	6306.25
5975	5684.6	5512.79	5535.45	5517.31	5654.62	5515.6	290.397		863.1	6084.38
5806.25	5683.25	5513.91	5537.2	5518.35	5652.74	5516.69	123.004		863	6503.12
5653.12	5681.74	5515.04	5538.99	5519.39	5650.68	5517.78	-28.6138		862.9	6187.5
5640.62	5680.11	5516.16	5540.81	5520.44	5648.47	5518.88	-39.4888		862.8	6468.75
5809.38	5678.4	5517.28	5542.65	5521.49	5646.14	5519.97	130.972		862.7	6231.25
5681.25	5676.64	5518.41	5544.53	5522.54	5643.72	5521.07	4.61523		862.6	6321.88
5762.5	5674.84	5519.53	5546.45	5523.59	5641.23	5522.16	87.6602		862.5	6271.88
5818.75	5673.04	5520.65	5548.41	5524.64	5638.69	5523.26	145.707		862.4	6215.62
5703.12	5671.27	5521.78	5550.41	5525.7	5636.13	5524.36	31.8589		862.3	6215.62
5815.62	5669.54	5522.9	5552.46	5526.76	5633.57	5525.46	146.089		862.2	6234.38
5556.25	5667.87	5524.02	5554.55	5527.81	5631.02	5526.55	-111.619		862.1	6543.75
5712.5	5666.29	5525.15	5556.7	5528.88	5628.51	5527.65	46.2124		862	6256.25
5612.5	5664.81	5526.27	5558.9	5529.94	5626.04	5528.75	-52.3066		861.9	6168.75
5821.88	5663.44	5527.4	5561.16	5531	5623.62	5529.85	158.436		861.8	5906.25
5775	5662.2	5528.52	5563.48	5532.07	5621.27	5530.95	112.798		861.7	6187.5
5965.62	5661.1	5529.64	5565.87	5533.13	5618.99	5532.05	304.519		861.6	6012.5
5868.75	5660.16	5530.77	5568.33	5534.2	5616.79	5533.15	208.587		861.5	6415.62
5690.62	5659.38	5531.89	5570.86	5535.27	5614.67	5534.25	31.2432		861.4	6196.88
5687.5	5658.77	5533.01	5573.48	5536.34	5612.64	5535.35	28.728		861.3	6025
5603.12	5658.34	5534.14	5576.19	5537.41	5610.71	5536.45	-55.2192		861.2	6287.5
5640.62	5658.1	5535.26	5578.98	5538.48	5608.87	5537.55	-17.4775		861.1	6203.12
5631.25	5658.06	5536.38	5581.88	5539.56	5607.12	5538.65	-26.8061		861	6415.62
5700	5658.21	5537.51	5584.87	5540.63	5605.48	5539.75	41.7886		860.9	6156.25
5871.88	5658.57	5538.63	5587.98	5541.71	5603.93	5540.85	213.3		860.8	6056.25
5662.5	5659.15	5539.75	5591.2	5542.79	5602.48	5541.96	3.34766		860.7	6165.62
5690.62	5659.95	5540.88	5594.54	5543.86	5601.12	5543.06	30.6763		860.6	6109.38
5815.62	5660.97	5542	5598.01	5544.94	5599.86	5544.16	154.654		860.5	6153.12
5628.12	5662.22	5543.12	5601.61	5546.02	5598.69	5545.27	-34.0977		860.4	6462.5
5834.38	5663.71	5544.25	5605.36	5547.1	5597.62	5546.37	170.665		860.3	6396.88
6065.62	5665.44	5545.37	5609.26	5548.19	5596.64	5547.47	400.188		860.2	6193.75
5578.12	5667.41	5546.5	5613.31	5549.27	5595.74	5548.58	-89.2847		860.1	6175
5575	5669.63	5547.62	5617.52	5550.35	5594.93	5549.68	-94.6309		860	6203.12
5578.12	5672.1	5548.74	5621.9	5551.44	5594.21	5550.79	-93.9805		859.9	6309.38
6028.12	5674.84	5549.87	5626.46	5552.52	5593.56	5551.89	353.286		859.8	6371.88
5743.75	5677.83	5550.99	5631.2	5553.61	5593	5553	65.918		859.7	6103.12
5700	5681.09	5552.11	5636.12	5554.7	5592.51	5554.1	18.9077		859.6	6062.5
5625	5684.62	5553.24	5641.24	5555.79	5592.1	5555.21	-59.6182		859.5	6268.75
5740.62	5688.41	5554.36	5646.56	5556.87	5591.75	5556.31	52.2109		859.4	6512.5
5790.62	5692.48	5555.48	5652.07	5557.96	5591.48	5557.42	98.1416		859.3	6318.75
5775	5696.82	5556.61	5657.8	5559.05	5591.27	5558.52	78.1758		859.2	6228.12
5781.25	5701.44	5557.73	5663.74	5560.14	5591.12	5559.63	79.8086		859.1	6515.62
5734.38	5706.33	5558.85	5669.88	5561.23	5591.03	5560.74	28.0464		859	6340.62
5453.12	5711.49	5559.98	5676.24	5562.33	5591.01	5561.85	-258.362		858.9	6240.62
5550	5716.92	5561.1	5682.82	5563.42	5591.03	5562.95	-166.916		858.8	6487.5
5853.12	5722.61	5562.23	5689.6	5564.51	5591.11	5564.06	130.519		858.7	5990.62
5843.75	5728.55	5563.35	5696.59	5565.61	5591.24	5565.17	115.196		858.6	6421.88
5856.25	5734.75	5564.47	5703.77	5566.7	5591.42	5566.28	121.504		858.5	6462.5
5500	5741.17	5565.6	5711.14	5567.8	5591.64	5567.38	-241.173		858.4	6496.88
5625	5747.82	5566.72	5718.69	5568.89	5591.9	5568.49	-122.823		858.3	6368.75
5853.12	5754.67	5567.84	5726.4	5569.99	5592.21	5569.6	98.4536		858.2	6484.38
5931.25	5761.7	5568.97	5734.25	5571.08	5592.55	5570.71	169.548		858.1	6381.25
5471.88	5768.88	5570.09	5742.22	5572.18	5592.94	5571.82	-297.005		858	6409.38
6046.88	5776.18	5571.21	5750.26	5573.28	5593.35	5572.93	270.697		857.9	6581.25
5875	5783.56	5572.34	5758.36	5574.38	5593.8	5574.04	91.4394		857.8	6406.25
5825	5790.98	5573.46	5766.46	5575.47	5594.28	5575.15	34.0225		857.7	6237.5
5712.5	5798.39	5574.58	5774.52	5576.57	5594.79	5576.26	-85.8872		857.6	6400
5890.62	5805.72	5575.71	5782.48	5577.67	5595.33	5577.36	84.9014		857.5	6271.88
5875	5812.93	5576.83	5790.28	5578.77	5595.89	5578.48	62.0688		857.4	6512.5
5643.75	5819.94	5577.95	5797.87	5579.87	5596.48	5579.59	-176.195		857.3	6340.62
5771.88	5826.69	5579.08	5805.16	5580.97	5597.09	5580.69	-54.8105		857.2	6140.62
5815.62	5833.08	5580.2	5812.08	5582.07	5597.73	5581.81	-17.458		857.1	6221.88
5756.25	5839.06	5581.32	5818.56	5583.17	5598.38	5582.92	-82.8052		857	6534.38
6018.75	5844.53	5582.45	5824.51	5584.28	5599.06	5584.03	174.223		856.9	6290.62
5743.75	5849.42	5583.57	5829.87	5585.38	5599.75	5585.14	-105.674		856.8	6087.5
5790.62	5853.67	5584.69	5834.57	5586.48	5600.46	5586.25	-63.0493		856.7	6184.38
5887.5	5857.22	5585.82	5838.54	5587.58	5601.19	5587.36	30.2817		856.6	6443.75
5771.88	5860	5586.94	5841.74	5588.69	5601.93	5588.47	-88.1265		856.5	6528.12
5546.88	5861.99	5588.06	5844.12	5589.79	5602.69	5589.58	-315.112		856.4	6159.38
5643.75	5863.15	5589.19	5845.67	5590.9	5603.46	5590.69	-219.4		856.3	6243.75
5800	5863.48	5590.31	5846.37	5592	5604.25	5591.81	-63.4819		856.2	6212.5
5812.5	5862.99	5591.44	5846.23	5593.1	5605.04	5592.92	-50.4888		856.1	6246.88
5812.5	5861.7	5592.56	5845.28	5594.21	5605.85	5594.03	-49.1958		856	6153.12
5850	5859.64	5593.68	5843.56	5595.31	5606.67	5595.14	-9.63916		855.9	6496.88
6018.75	5856.87	5594.81	5841.11	5596.42	5607.51	5596.25	161.883		855.8	6346.88
6062.5	5853.44	5595.93	5838	5597.52	5608.35	5597.37	209.056		855.7	6196.88
5850	5849.43	5597.05	5834.29	5598.63	5609.2	5598.48	0.56738		855.6	6384.38
5800	5844.91	5598.18	5830.06	5599.74	5610.06	5599.59	-44.9131		855.5	6337.5
6087.5	5839.96	5599.3	5825.39	5600.84	5610.93	5600.7	247.541		855.4	6153.12
6078.12	5834.64	5600.42	5820.34	5601.95	5611.81	5601.82	243.484		855.3	6246.88
5868.75	5829.04	5601.55	5815.01	5603.06	5612.69	5602.93	39.7095		855.2	6337.5
5928.12	5823.22	5602.67	5809.44	5604.16	5613.58	5604.04	104.903		855.1	6440.62
6043.75	5817.26	5603.79	5803.73	5605.27	5614.48	5605.16	226.492		855	6284.38
5996.88	5811.21	5604.92	5797.92	5606.38	5615.39	5606.27	185.669		854.9	6203.12
5771.88	5805.11	5606.04	5792.06	5607.49	5616.3	5607.38	-33.2393		854.8	6190.62
5987.5	5799.04	5607.16	5786.22	5608.6	5617.22	5608.5	188.46		854.7	6384.38
5746.88	5793.01	5608.29	5780.41	5609.71	5618.15	5609.61	-46.1392		854.6	6287.5
5725	5787.08	5609.41	5774.7	5610.81	5619.08	5610.72	-62.0835		854.5	6218.75
5703.12	5781.27	5610.54	5769.1	5611.92	5620.02	5611.84	-78.1479		854.4	6231.25
5859.38	5775.6	5611.66	5763.63	5613.03	5620.96	5612.95	83.772		854.3	6521.88
5896.88	5770.1	5612.78	5758.33	5614.14	5621.91	5614.07	126.773		854.2	6412.5
5665.62	5764.78	5613.91	5753.2	5615.25	5622.86	5615.18	-99.1538		854.1	5987.5
5740.62	5759.65	5615.03	5748.27	5616.36	5623.82	5616.29	-19.0283		854	6303.12
5525	5754.73	5616.15	5743.53	5617.47	5624.78	5617.41	-229.731		853.9	6421.88
5928.12	5750.02	5617.28	5738.99	5618.58	5625.75	5618.52	178.11		853.8	6440.62
5806.25	5745.52	5618.4	5734.67	5619.69	5626.72	5619.64	60.7339		853.7	6256.25
5668.75	5741.23	5619.52	5730.55	5620.81	5627.69	5620.75	-72.48		853.6	6381.25
5618.75	5737.16	5620.65	5726.65	5621.92	5628.67	5621.87	-118.415		853.5	6340.62
5493.75	5733.31	5621.77	5722.97	5623.03	5629.65	5622.98	-239.565		853.4	6365.62
5746.88	5729.68	5622.9	5719.49	5624.14	5630.64	5624.1	17.1992		853.3	6371.88
5709.38	5726.25	5624.02	5716.22	5625.25	5631.63	5625.21	-16.8755		853.2	6343.75
5993.75	5723.03	5625.14	5713.14	5626.36	5632.62	5626.33	270.722		853.1	6140.62
5875	5720.01	5626.27	5710.27	5627.47	5633.62	5627.44	154.99		853	6171.88
5690.62	5717.19	5627.39	5707.6	5628.59	5634.61	5628.56	-26.5645		852.9	6246.88
5718.75	5714.56	5628.51	5705.1	5629.7	5635.62	5629.67	4.19336		852.8	6190.62
5928.12	5712.11	5629.64	5702.8	5630.81	5636.62	5630.79	216.014		852.7	6350
6128.12	5709.84	5630.76	5700.66	5631.92	5637.63	5631.9	418.284		852.6	6337.5
5553.12	5707.74	5631.88	5698.7	5633.03	5638.64	5633.02	-154.62		852.5	6409.38
5809.38	5705.81	5633.01	5696.89	5634.15	5639.65	5634.14	103.561		852.4	6340.62
5703.12	5704.04	5634.13	5695.24	5635.26	5640.67	5635.25	-0.91357		852.3	6550
5690.62	5702.42	5635.25	5693.74	5636.37	5641.69	5636.37	-11.792		852.2	6262.5
5728.12	5700.94	5636.38	5692.39	5637.49	5642.71	5637.48	27.1885		852.1	6553.12
5637.5	5699.6	5637.5	5691.16	5638.6	5643.73	5638.6	-62.0967		852	6203.12
5809.38									851.9	6356.25
5765.62									851.8	6018.75
5909.38									851.7	6284.38
5715.62									851.6	6162.5
5828.12									851.5	6206.25
5993.75									851.4	6271.88
5728.12									851.3	6503.12
5793.75									851.2	6471.88
5684.38									851.1	6178.12
5846.88									851	6246.88
5637.5									850.9	6465.62
5615.62									850.8	6534.38
5984.38									850.7	6203.12
5815.62									850.6	6612.5
5737.5									850.5	6515.62
5712.5									850.4	6475
5684.38									850.3	6250
5631.25									850.2	6350
5584.38									850.1	6531.25
5878.12									850	6437.5
5925									849.9	6293.75
5696.88									849.8	6371.88
5900									849.7	6481.25
5796.88									849.6	6393.75
5718.75									849.5	6200
5843.75									849.4	6406.25
5603.12									849.3	6525
5806.25									849.2	6418.75
5812.5									849.1	6346.88
5746.88									849	6521.88
5787.5									848.9	6309.38
5765.62									848.8	6837.5
5728.12									848.7	6396.88
5684.38									848.6	6406.25
5693.75									848.5	6362.5
5537.5									848.4	6700
5871.88									848.3	6543.75
5618.75									848.2	6262.5
5725									848.1	6306.25
5818.75									848	6428.12
5681.25									847.9	6471.88
5775									847.8	6840.62
5843.75									847.7	6512.5
5850									847.6	6375
5878.12									847.5	6490.62
5737.5									847.4	6565.62
5818.75									847.3	6537.5
5912.5									847.2	6471.88
5909.38									847.1	6675
5781.25									847	6150
5656.25									846.9	6159.38
5850									846.8	6456.25
5787.5									846.7	6431.25
5856.25									846.6	6600
5825									846.5	6353.12
5803.12									846.4	6615.62
5900									846.3	6503.12
5950									846.2	6412.5
5596.88									846.1	6406.25
5906.25									846	6668.75
									845.9	6334.38
									845.8	6418.75
									845.7	6493.75
									845.6	6518.75
									845.5	6675
									845.4	6631.25
									845.3	6537.5
									845.2	6406.25
									845.1	6443.75
									845	6556.25
									844.9	6300
									844.8	6406.25
									844.7	6268.75
									844.6	6803.12
									844.5	6621.88
									844.4	6334.38
									844.3	6512.5
									844.2	6278.12
									844.1	6534.38
									844	6359.38

## Sheet: Figure 1f
Ni/POM@MOF									POM@MOF
B.E.	Raw	Intensity	Peak	Sum	Background	Peak	1		B.E.	Raw	Intensity	Peak	Sum	Background	Peak	1
965.9	6490.62	6741.85	6480.62	6487.12	6503.36	6505.42	6687.83		966.7	7309.38	7712.29	7299.38	7308.94	7321.48	7334.2	7645.81
965.8	6281.25	6744.89	6470.68	6477.21	6493.6	6495.92	6690.18		966.6	7628.12	7720.62	7289.41	7299.03	7311.7	7324.84	7653.29
965.7	6459.38	6747.86	6459.73	6466.31	6482.86	6485.44	6692.46		966.5	7696.88	7731.12	7280.63	7290.31	7303.11	7316.67	7662.92
965.6	6825	6752.76	6449.73	6456.35	6473.05	6475.9	6696.65		966.4	7337.5	7742.95	7272.13	7281.88	7294.8	7308.81	7673.86
965.5	6487.5	6760.55	6441.6	6448.26	6465.12	6468.25	6703.71		966.3	7462.5	7754.56	7262.37	7272.18	7285.23	7299.69	7684.57
965.4	6696.88	6767.8	6431.82	6438.53	6455.55	6458.97	6710.21		966.2	7668.75	7767.76	7253.09	7262.96	7276.14	7291.08	7696.84
965.3	6587.5	6777.26	6423.14	6429.89	6447.07	6450.8	6718.91		966.1	7871.88	7782.86	7244.59	7254.52	7267.84	7283.26	7711
965.2	6584.38	6787.4	6413.96	6420.75	6438.1	6442.14	6728.28		966	7756.25	7799.86	7236.85	7246.85	7260.3	7276.23	7727.02
965.1	6812.5	6798.8	6404.8	6411.64	6429.16	6433.52	6738.88		965.9	7587.5	7817.63	7228.72	7238.78	7252.37	7268.82	7743.8
965	6721.88	6812.62	6396.83	6403.71	6421.4	6426.1	6751.89		965.8	7531.25	7835.97	7220.01	7230.14	7243.87	7260.86	7761.13
964.9	6975	6827.32	6388.44	6395.37	6413.23	6418.29	6765.75		965.7	8071.88	7855.3	7211.13	7221.33	7235.2	7252.74	7779.42
964.8	6768.75	6844.6	6381.35	6388.33	6406.36	6411.79	6782.18		965.6	7831.25	7877.77	7204.23	7214.5	7228.52	7246.63	7800.82
964.7	6903.12	6862.19	6373.27	6380.3	6398.51	6404.32	6798.89		965.5	7956.25	7900.5	7196.49	7206.83	7220.99	7239.69	7822.47
964.6	6853.12	6881.77	6365.91	6372.98	6391.37	6397.57	6817.57		965.4	7856.25	7924.82	7189.23	7199.63	7213.94	7233.26	7845.67
964.5	7100	6902.38	6358.32	6365.45	6384.02	6390.63	6837.26		965.3	7965.62	7949.81	7181.63	7192.1	7206.56	7226.52	7869.52
964.4	6846.88	6925.44	6352.01	6359.18	6377.93	6384.98	6859.38		965.2	8006.25	7976.18	7174.46	7185	7199.61	7220.22	7894.72
964.3	6978.12	6948.35	6344.46	6351.68	6370.62	6378.12	6881.32		965.1	8062.5	8003.6	7167.45	7178.07	7192.84	7214.12	7920.93
964.2	6881.25	6972.9	6337.61	6344.88	6364.01	6371.97	6904.88		965	8318.75	8031.95	7160.68	7171.36	7186.29	7208.28	7948.05
964.1	7237.5	6997.82	6330.31	6337.63	6356.95	6365.39	6928.78		964.9	8296.88	8061.85	7154.85	7165.61	7180.69	7203.41	7976.69
964	7196.88	7025.08	6324.81	6332.18	6351.7	6360.64	6955		964.8	8078.12	8092.06	7148.97	7159.8	7175.04	7198.52	8005.6
963.9	7134.38	7052.48	6319.14	6326.56	6346.28	6355.75	6981.32		964.7	8050	8121.67	7142.31	7153.22	7168.63	7192.88	8033.88
963.8	7290.62	7079.52	6313.19	6320.66	6340.58	6350.59	7007.26		964.6	8381.25	8151.14	7135.58	7146.56	7162.14	7187.2	8061.98
963.7	7456.25	7106.9	6308.04	6315.57	6335.69	6346.27	7033.5		964.5	8084.38	8181.41	7130.07	7141.13	7156.87	7182.77	8090.85
963.6	7196.88	7134.21	6303.74	6311.32	6331.65	6342.82	7059.66		964.4	8193.75	8209.93	7123.51	7134.64	7150.56	7177.33	8117.93
963.5	7206.25	7158.79	6298.18	6305.81	6326.35	6338.13	7083.04		964.3	8309.38	8237.76	7117.37	7128.58	7144.67	7172.34	8144.28
963.4	7471.88	7181.43	6292.69	6300.37	6321.12	6333.55	7104.45		964.2	8246.88	8264.52	7111.66	7122.95	7139.22	7167.82	8169.52
963.3	7040.62	7202.78	6288.54	6296.28	6317.25	6330.35	7124.54		964.1	8337.5	8289.19	7105.75	7117.12	7133.56	7163.14	8192.62
963.2	7068.75	7218.8	6282.28	6290.07	6311.26	6325.05	7139.25		964	8493.75	8311.83	7100.19	7111.63	7128.27	7158.85	8213.65
963.1	7184.38	7231.22	6276.18	6284.03	6305.44	6319.97	7150.33		963.9	8518.75	8332.28	7095.21	7106.74	7123.55	7155.18	8232.45
963	7496.88	7239.97	6270.69	6278.59	6300.23	6315.52	7157.69		963.8	8193.75	8349.62	7090.34	7101.95	7118.95	7151.66	8248.08
962.9	7118.75	7245.63	6266.78	6274.74	6296.61	6312.68	7161.94		963.7	8737.5	8362.22	7084.32	7096	7113.2	7147.04	8258.92
962.8	7171.88	7244.52	6261.01	6269.02	6291.13	6308.03	7159.36		963.6	8334.38	8372.89	7080.27	7092.04	7109.43	7144.44	8267.78
962.7	7146.88	7238.69	6255.53	6263.6	6285.95	6303.71	7152.01		963.5	8487.5	8377.92	7074.79	7086.65	7104.23	7140.46	8270.96
962.6	7146.88	7227.8	6249.95	6258.09	6280.67	6299.34	7139.56		963.4	8900	8379.18	7069.88	7081.82	7099.61	7137.1	8270.29
962.5	7268.75	7212.22	6244.41	6252.6	6275.43	6295.04	7122.37		963.3	8478.12	8377.48	7066.48	7078.5	7096.49	7135.3	8266.61
962.4	6881.25	7192.88	6239.49	6247.75	6270.82	6291.43	7101.36		963.2	8340.62	8369.83	7061.56	7073.67	7091.87	7132.05	8256.92
962.3	7068.75	7167.75	6232.68	6240.99	6264.32	6285.96	7074.52		963.1	8550	8357.36	7056.17	7068.37	7086.78	7128.38	8242.34
962.2	7121.88	7140.24	6226.83	6235.2	6258.79	6281.5	7045.24		963	8118.75	8341.52	7051.55	7063.84	7082.46	7125.54	8224.34
962.1	7237.5	7110.26	6221.27	6229.71	6253.56	6277.4	7013.42		962.9	8021.88	8320.28	7045.4	7057.77	7076.62	7121.24	8200.84
962	7306.25	7078.74	6216.32	6224.82	6248.93	6273.95	6980		962.8	8265.62	8295.2	7038.92	7051.38	7070.45	7116.68	8173.44
961.9	6765.62	7046.01	6211.73	6220.29	6244.68	6270.94	6945.29		962.7	8034.38	8267.9	7033.34	7045.89	7065.18	7113.09	8143.74
961.8	6962.5	7009.6	6204.48	6213.11	6237.76	6265.32	6906.85		962.6	8231.25	8237.07	7026.94	7039.59	7059.11	7108.77	8110.43
961.7	6959.38	6973.67	6198.24	6206.94	6231.87	6260.79	6868.82		962.5	7821.88	8204.73	7021.28	7034.02	7053.77	7105.26	8075.52
961.6	6709.38	6937.64	6192.02	6200.78	6226	6256.34	6830.59		962.4	7962.5	8169.09	7014.17	7027	7046.99	7100.38	8037.22
961.5	7168.75	6900.66	6184.59	6193.41	6218.92	6250.76	6791.35		962.3	7925	8132.62	7007.58	7020.51	7040.74	7096.11	7997.99
961.4	6625	6866.54	6179.48	6188.37	6214.16	6247.57	6754.87		962.2	7943.75	8095.04	7000.89	7013.92	7034.39	7091.84	7957.57
961.3	6806.25	6830.56	6171.69	6180.65	6206.74	6241.8	6716.44		962.1	7990.62	8056.93	6994.29	7007.41	7028.13	7087.75	7916.49
961.2	6684.38	6796.5	6164.84	6173.86	6200.26	6237.05	6679.85		962	7809.38	8018.75	6987.88	7001.1	7022.07	7083.96	7875.24
961.1	6693.75	6763	6157.42	6166.51	6193.22	6231.83	6643.7		961.9	7853.12	7979.94	6980.84	6994.16	7015.39	7079.65	7833.25
961	6731.25	6730.84	6150.08	6159.25	6186.26	6226.79	6608.79		961.8	8203.12	7941.62	6973.98	6987.4	7008.9	7075.63	7791.63
960.9	6809.38	6700.2	6142.97	6152.2	6179.54	6222.08	6575.29		961.7	7615.62	7905.1	6968.41	6981.93	7003.69	7073.03	7751.67
960.8	6675	6671.38	6136.28	6145.58	6173.24	6217.9	6543.49		961.6	7871.88	7867.17	6960.74	6974.37	6996.4	7068.46	7710.16
960.7	6975	6643.31	6128.95	6138.33	6166.31	6213.21	6512.31		961.5	7828.12	7831.06	6954.02	6967.75	6990.06	7064.97	7670.34
960.6	6721.88	6618.17	6123.15	6132.6	6160.92	6210.18	6483.93		961.4	7775	7795.8	6947.17	6961.01	6983.6	7061.5	7631.21
960.5	6784.38	6593.22	6116.13	6125.65	6154.31	6206.05	6455.59		961.3	7821.88	7761.49	6940.15	6954.1	6976.97	7058.02	7592.86
960.4	6587.5	6570	6109.44	6119.04	6148.05	6202.41	6428.83		961.2	7740.62	7728.55	6933.33	6947.38	6970.55	7054.89	7555.72
960.3	6615.62	6547.21	6101.82	6111.49	6140.85	6197.98	6402.35		961.1	7581.25	7696.57	6926.24	6940.4	6963.86	7051.68	7519.35
960.2	6821.88	6525.95	6094.37	6104.12	6133.83	6193.89	6377.21		961	8015.62	7665.36	6918.6	6932.87	6956.63	7048.1	7483.56
960.1	6512.5	6507.06	6087.98	6097.81	6127.89	6191.05	6354.26		960.9	7437.5	7637.06	6912.55	6926.94	6951	7046.31	7450.46
960	6271.88	6487.95	6080.09	6089.99	6120.44	6186.88	6330.89		960.8	7765.62	7608.07	6904.44	6918.94	6943.32	7042.68	7416.46
959.9	6709.38	6468.92	6071.04	6081.03	6111.85	6181.77	6307.39		960.7	7890.62	7581.66	6897.55	6912.16	6936.85	7040.48	7384.8
959.8	6546.88	6453.33	6064.21	6074.28	6105.49	6179.09	6287.1		960.6	7603.12	7557.1	6891.12	6905.85	6930.87	7039.01	7354.74
959.7	6459.38	6438.13	6056.6	6066.76	6098.36	6175.88	6266.96		960.5	7609.38	7532.94	6883.69	6898.53	6923.89	7036.79	7324.79
959.6	6537.5	6423.68	6048.6	6058.84	6090.84	6172.53	6247.28		960.4	7765.62	7510.2	6876.3	6891.27	6916.95	7034.91	7295.98
959.5	6431.25	6410.77	6041.03	6051.35	6083.75	6169.89	6228.87		960.3	7637.5	7489.45	6869.51	6884.59	6910.62	7033.93	7268.84
959.4	6646.88	6398.44	6032.97	6043.37	6076.19	6167.06	6210.73		960.2	7343.75	7469.65	6862.27	6877.48	6903.86	7032.85	7242.3
959.3	6515.62	6388.29	6026.02	6036.5	6069.74	6165.68	6194.42		960.1	7703.12	7450.21	6854.01	6869.34	6896.07	7031.1	7215.73
959.2	6390.62	6378.56	6018.45	6029.02	6062.69	6164.03	6178.17		960	7462.5	7433.47	6847.07	6862.52	6889.62	7031.07	7191.47
959.1	6675	6369.29	6010.3	6020.95	6055.06	6162.21	6161.94		959.9	7656.25	7417.28	6839.29	6854.86	6882.33	7030.65	7167.3
959	6431.25	6362.48	6003.6	6014.34	6048.89	6162.28	6147.75		959.8	7496.88	7403.21	6832.23	6847.94	6875.77	7031.42	7144.77
958.9	6471.88	6355.54	5995.72	6006.56	6041.56	6161.67	6132.91		959.7	7484.38	7389.99	6824.62	6840.46	6868.68	7032.16	7122.56
958.8	6481.25	6349.87	5988.08	5999.01	6034.48	6161.82	6118.81		959.6	7721.88	7378.15	6817	6832.97	6861.58	7033.47	7101.15
958.7	6146.88	6345.35	5980.53	5991.55	6027.48	6162.67	6105.24		959.5	7481.25	7368.64	6810.26	6826.36	6855.37	7036.28	7081.42
958.6	6375	6340.3	5971.36	5982.47	6018.88	6162.56	6090.46		959.4	7915.62	7359.73	6802.68	6818.91	6848.33	7038.95	7061.59
958.5	6559.38	6337.57	5963.36	5974.57	6011.47	6164.36	6077.25		959.3	7293.75	7353.9	6796.69	6813.06	6842.89	7043.96	7044.07
958.4	6453.12	6336.98	5956.32	5967.62	6005.02	6167.96	6065.33		959.2	7734.38	7347.38	6788.48	6804.98	6835.23	7047.6	7025
958.3	6381.25	6337.16	5948.79	5960.19	5998.09	6171.99	6053.25		959.1	7531.25	7344.04	6781.89	6798.53	6829.21	7053.78	7008.19
958.2	6484.38	6338.35	5940.94	5952.43	5990.86	6176.73	6041.15		959	7431.25	7341.63	6774.59	6791.37	6822.49	7060.27	6991.27
958.1	6075	6341.55	5933.63	5945.23	5984.18	6183.18	6029.86		958.9	7603.12	7340.58	6766.96	6783.88	6815.45	7067.54	6974.57
958	6687.5	6344.29	5924.33	5936.03	5975.52	6188.91	6016.82		958.8	7543.75	7341.94	6759.97	6777.04	6809.06	7076.68	6959.06
957.9	6437.5	6351.8	5918.12	5929.93	5969.96	6199.18	6007.1		958.7	7425	7344.96	6752.79	6770.01	6802.5	7086.97	6943.86
957.8	6400	6359.9	5910.7	5922.61	5963.2	6209.82	5996.38		958.6	7737.5	7349.54	6745.21	6762.58	6795.54	7098.34	6928.73
957.7	6640.62	6369.83	5903.13	5915.14	5956.31	6222.08	5985.69		958.5	7656.25	7357.33	6738.79	6756.3	6789.75	7112.46	6915.18
957.6	6809.38	6383.15	5896.79	5908.91	5950.66	6237.54	5976.42		958.4	7640.62	7367.02	6732.1	6749.76	6783.71	7128.06	6901.78
957.5	6415.62	6399.65	5891.32	5903.55	5945.89	6256.01	5968.18		958.3	7712.5	7378.96	6725.37	6743.19	6777.64	7145.52	6888.72
957.4	6281.25	6416.76	5883.93	5896.26	5939.21	6274.92	5958.16		958.2	7606.25	7393.61	6718.93	6736.9	6771.87	7165.31	6876.31
957.3	6662.5	6435.96	5875.9	5888.34	5931.91	6295.76	5947.64		958.1	7365.62	7410.48	6712.12	6730.26	6765.75	7186.97	6863.87
957.2	6562.5	6460.03	5869.81	5882.36	5926.56	6321.34	5939.19		958	7768.75	7429.2	6704.48	6722.77	6758.8	7210.15	6850.9
957.1	6621.88	6486.82	5863.24	5875.91	5920.76	6349.5	5930.39		957.9	7575	7452.26	6698.31	6716.77	6753.35	7237.39	6839.7
957	6706.25	6517.3	5857.01	5869.79	5915.3	6381.22	5922.02		957.8	7728.12	7477.64	6691.47	6710.09	6747.23	7266.64	6828.09
956.9	6453.12	6551.85	5851.23	5864.12	5910.3	6416.89	5914.21		957.7	7715.62	7506.75	6685.21	6703.99	6741.71	7299.35	6817.31
956.8	6346.88	6588.96	5844.22	5857.23	5904.1	6455.01	5905.26		957.6	7506.25	7539.15	6678.92	6697.87	6736.17	7335.12	6806.74
956.7	6531.25	6629.57	5836.71	5849.85	5897.41	6496.53	5895.91		957.5	7693.75	7574.24	6671.9	6691.02	6729.92	7373.33	6795.66
956.6	7021.88	6675.33	5830.16	5843.42	5891.7	6543.09	5887.6		957.4	7750	7613.62	6665.58	6684.88	6724.39	7415.62	6785.48
956.5	6640.62	6727.83	5826.08	5839.46	5888.47	6596.3	5881.83		957.3	7606.25	7656.88	6659.49	6678.96	6719.1	7461.57	6775.71
956.4	6650	6782.87	5820.12	5833.62	5883.39	6651.95	5874.27		957.2	7978.12	7703.42	6652.9	6672.55	6713.32	7510.61	6765.63
956.3	7053.12	6842.35	5814.24	5827.87	5878.4	6711.96	5866.84		957.1	7771.88	7755.18	6647.67	6667.51	6708.93	7564.69	6757.07
956.2	7015.62	6908.19	5810.39	5824.15	5875.46	6778.24	5861.52		957	7775	7810.04	6641.73	6661.74	6703.83	7621.7	6747.94
956.1	6818.75	6978.06	5806.38	5820.27	5872.37	6848.46	5856.08		956.9	7640.62	7868.81	6635.81	6656.01	6698.79	7682.44	6738.99
956	6996.88	7050.73	5801.4	5815.42	5868.35	6921.41	5849.75		956.8	8187.5	7930.81	6629.43	6649.82	6693.29	7746.27	6729.71
955.9	7043.75	7127.64	5797.34	5811.49	5865.25	6998.53	5844.38		956.7	7740.62	7998.37	6625.04	6645.62	6689.81	7815.51	6722.55
955.8	6946.88	7207.29	5793.52	5807.82	5862.43	7078.3	5839.31		956.6	7928.12	8067.69	6619.06	6639.84	6684.75	7886.37	6713.91
955.7	7278.12	7287.97	5789.25	5803.68	5859.16	7159.04	5833.83		956.5	7918.75	8140.56	6613.78	6634.75	6680.41	7960.65	6706.09
955.6	7296.88	7370.5	5786.64	5801.21	5857.59	7241.56	5830.07		956.4	8153.12	8215.84	6608.48	6629.65	6676.08	8037.2	6698.35
955.5	7240.62	7451.53	5784.14	5798.85	5856.14	7322.5	5826.45		956.3	8187.5	8293.57	6604.05	6625.42	6672.63	8116.09	6691.57
955.4	7425	7528.72	5781.37	5796.23	5854.45	7399.55	5822.61		956.2	8306.25	8372.19	6599.75	6621.33	6669.34	8195.75	6685.02
955.3	7425	7600.85	5779.53	5794.53	5853.72	7471.46	5819.73		956.1	8193.75	8450.91	6595.9	6617.69	6666.52	8275.39	6679.01
955.2	7418.75	7664.5	5777.7	5792.85	5853.01	7534.83	5816.91		956	8518.75	8527.44	6591.66	6613.65	6663.32	8352.74	6672.69
955.1	7206.25	7717.12	5775.85	5791.15	5852.31	7587.11	5814.1		955.9	8378.12	8601.89	6588.6	6610.81	6661.34	8427.9	6667.63
955	7384.38	7755.26	5772.95	5788.4	5850.6	7624.84	5810.27		955.8	8500	8670.72	6585.05	6607.47	6658.89	8497.35	6662.15
954.9	7571.88	7778.97	5770.95	5786.56	5849.8	7648.08	5807.38		955.7	8434.38	8733.06	6581.95	6604.59	6656.91	8560.21	6657.19
954.8	7725	7786.99	5769.89	5785.66	5849.98	7655.57	5805.46		955.6	8678.12	8786.37	6578.62	6601.49	6654.73	8613.94	6652.07
954.7	7453.12	7778.73	5769.6	5785.52	5850.95	7646.73	5804.34		955.5	8553.12	8829.84	6576.19	6599.28	6653.47	8657.74	6647.91
954.6	7681.25	7752.51	5767.96	5784.05	5850.6	7619.85	5801.89		955.4	8665.62	8860.62	6573.31	6596.64	6651.79	8688.76	6643.36
954.5	7653.12	7712.09	5767.46	5783.71	5851.42	7578.72	5800.61		955.3	8968.75	8878.26	6570.85	6594.41	6650.56	8706.55	6639.29
954.4	7462.5	7658.09	5766.82	5783.24	5852.14	7523.95	5799.22		955.2	8456.25	8882.7	6569.49	6593.28	6650.45	8711.05	6636.37
954.3	7296.88	7592.14	5765.24	5781.83	5851.94	7457.16	5796.92		955.1	8803.12	8870.75	6566.28	6590.32	6648.54	8699.07	6631.66
954.2	7181.25	7516.88	5762.84	5779.6	5850.97	7381.02	5793.82		955	8581.25	8845.86	6564.35	6588.63	6647.91	8674.09	6628.27
954.1	7128.12	7435.06	5759.89	5776.82	5849.47	7298.25	5790.18		954.9	8684.38	8806.84	6561.61	6586.14	6646.53	8634.88	6624.13
954	7118.75	7349.42	5756.68	5773.79	5847.75	7211.6	5786.32		954.8	8728.12	8756.23	6559.26	6584.04	6645.56	8584	6620.41
953.9	6981.25	7262.13	5753.44	5770.73	5846.04	7123.23	5782.44		954.7	8406.25	8695.45	6557.07	6582.11	6644.79	8522.87	6616.91
953.8	6731.25	7174.35	5749.54	5767.01	5843.7	7034.31	5777.92		954.6	8153.12	8624.99	6553.74	6579.04	6642.9	8451.97	6612.29
953.7	6893.75	7086.83	5744.41	5762.07	5840.18	6945.6	5772.2		954.5	8218.75	8547.08	6549.5	6575.06	6640.14	8373.55	6606.82
953.6	7059.38	7002.61	5740.12	5757.97	5837.54	6860.12	5767.33		954.4	8259.38	8464.64	6545.51	6571.34	6637.68	8290.53	6601.63
953.5	6850	6922.56	5736.67	5754.71	5835.78	6778.75	5763.32		954.3	8137.5	8379.4	6541.69	6567.79	6635.41	8204.62	6596.65
953.4	6531.25	6845.23	5732.19	5750.44	5833.04	6700.04	5758.3		954.2	8015.62	8292.25	6537.44	6563.82	6632.76	8116.73	6591.27
953.3	6784.38	6770.52	5726.16	5744.6	5828.78	6623.88	5751.74		954.1	8068.75	8204.44	6532.77	6559.42	6629.72	8028.09	6585.5
953.2	6815.62	6701.4	5721.42	5740.06	5825.86	6553.25	5746.48		954	8012.5	8117.79	6528.3	6555.24	6626.93	7940.54	6579.97
953.1	6553.12	6636.81	5716.85	5735.69	5823.17	6487.07	5741.42		953.9	8162.5	8032.67	6523.65	6550.88	6624.01	7854.43	6574.29
953	6612.5	6575.33	5711	5730.05	5819.25	6423.94	5735.09		953.8	7896.88	7950.59	6519.55	6547.08	6621.68	7771.29	6569.2
952.9	6421.88	6518.41	5705.48	5724.74	5815.71	6365.29	5729.09		953.7	7606.25	7870.51	6514.51	6542.34	6618.45	7690.07	6563.19
952.8	6484.38	6464.74	5699.03	5718.52	5811.3	6309.83	5722.19		953.6	7621.88	7792.66	6508.45	6536.58	6614.25	7611	6556.18
952.7	6378.12	6415.38	5692.93	5712.63	5807.29	6258.6	5715.65		953.5	7615.62	7718.48	6502.46	6530.9	6610.17	7535.51	6549.27
952.6	6390.62	6369.27	5686.33	5706.26	5802.85	6210.54	5708.62		953.4	7612.5	7647.94	6496.47	6525.23	6606.15	7463.58	6542.39
952.5	6246.88	6326.83	5679.83	5699.98	5798.56	6166.08	5701.7		953.3	7678.12	7581.21	6490.49	6519.57	6602.19	7395.38	6535.55
952.4	6237.5	6287.03	5672.65	5693.03	5793.65	6124.18	5694.11		953.2	7365.62	7518.5	6484.77	6514.17	6598.54	7331.12	6528.98
952.3	6121.88	6250.35	5665.45	5686.07	5788.8	6085.31	5686.52		953.1	7259.38	7458.38	6477.94	6507.68	6593.84	7269.36	6521.34
952.2	6109.38	6216.01	5657.72	5678.57	5783.48	6048.71	5678.4		953	7340.62	7401.58	6470.76	6500.83	6588.85	7210.83	6513.36
952.1	6112.5	6184.3	5649.96	5671.06	5778.21	6014.64	5670.27		952.9	7006.25	7348.6	6463.89	6494.3	6584.23	7156.03	6505.72
952	6037.5	6155.11	5642.26	5663.6	5773.08	5983	5662.2		952.8	6962.5	7297.89	6455.85	6486.6	6578.5	7103.41	6496.91
951.9	6006.25	6127.83	5634.22	5655.81	5767.69	5953.17	5653.81		952.7	7209.38	7250.31	6447.67	6478.78	6572.71	7053.83	6488.01
951.8	6071.88	6102.48	5626.06	5647.92	5762.26	5925.19	5645.31		952.6	7112.5	7206.74	6440.42	6471.89	6567.91	7008.16	6480.03
951.7	6031.25	6079.38	5618.28	5640.39	5757.3	5899.34	5637.19		952.5	7043.75	7165.82	6432.84	6464.68	6562.86	6965.04	6471.76
951.6	5703.12	6057.8	5610.33	5632.71	5752.26	5874.91	5628.91		952.4	7006.25	7127.44	6425.04	6457.25	6557.67	6924.37	6463.28
951.5	6103.12	6036.18	5600.79	5623.44	5745.73	5850.33	5619.05		952.3	6937.5	7091.6	6417.14	6449.72	6552.45	6886.12	6454.71
951.4	5950	6018	5593.28	5616.21	5741.33	5829.07	5611.23		952.2	6990.62	7057.99	6409.01	6441.98	6547.09	6850	6445.94
951.3	5946.88	6000.37	5585.05	5608.26	5736.32	5808.25	5602.7		952.1	6950	7026.87	6401.1	6434.47	6542.04	6816.27	6437.41
951.2	5946.88	5983.92	5576.85	5600.34	5731.44	5788.49	5594.2		952	6903.12	6997.79	6393.08	6426.85	6536.96	6784.45	6428.77
951.1	5790.62	5968.57	5568.69	5592.47	5726.73	5769.69	5585.75		951.9	6931.25	6970.54	6384.92	6419.09	6531.84	6754.35	6420.01
951	5653.12	5953.45	5559.79	5583.86	5721.4	5750.99	5576.57		951.8	6750	6945.27	6376.89	6411.47	6526.95	6726.11	6411.4
950.9	5759.38	5938.58	5550.25	5574.63	5715.56	5732.39	5566.76		951.7	6765.62	6921.08	6368.23	6403.24	6521.54	6698.82	6402.18
950.8	5440.62	5925.1	5541.29	5565.98	5710.44	5715.03	5557.53		951.6	6731.25	6898.54	6359.66	6395.1	6516.32	6673.05	6393.05
950.7	5871.88	5910.84	5530.79	5555.79	5703.92	5696.74	5546.77		951.5	6550	6877.37	6351	6386.88	6511.13	6648.52	6383.85
950.6	5718.75	5899.47	5522.48	5547.8	5699.75	5681.17	5538.2		951.4	6493.75	6856.92	6341.72	6378.04	6505.44	6624.56	6374.04
950.5	5650	5888.04	5513.46	5539.1	5695.01	5665.38	5528.93		951.3	6600	6837.55	6332.27	6369.04	6499.71	6601.53	6364.07
950.4	5493.75	5876.94	5504.14	5530.11	5690.15	5649.72	5519.36		951.2	6662.5	6819.74	6323.23	6360.47	6494.52	6579.92	6354.53
950.3	5728.12	5865.7	5494.09	5520.39	5684.74	5633.74	5509.07		951.1	6440.62	6803.26	6314.45	6352.16	6489.74	6559.47	6345.26
950.2	5553.12	5856.23	5485.25	5511.9	5680.73	5619.34	5500		951	6450	6787.01	6304.91	6343.1	6484.34	6539.07	6335.23
950.1	5515.62	5846.49	5475.58	5502.59	5676.1	5604.44	5490.11		950.9	6465.62	6771.74	6295.43	6334.11	6479.16	6519.49	6325.29
950	5512.5	5837.13	5465.78	5493.15	5671.53	5589.71	5480.09		950.8	6600	6757.44	6286.05	6325.22	6474.24	6500.68	6315.44
949.9	5543.75	5828.31	5456.02	5483.74	5667.22	5575.29	5470.11		950.7	6325	6744.47	6277.18	6316.86	6470.01	6483.01	6306.12
949.8	5631.25	5820.2	5446.45	5474.55	5663.34	5561.34	5460.33		950.6	6387.5	6731.3	6267.35	6307.55	6465.02	6464.93	6295.86
949.7	5706.25	5813.06	5437.37	5465.85	5660.18	5548.1	5451.04		950.5	6484.38	6719.13	6257.78	6298.51	6460.47	6447.64	6285.86
949.6	5525	5806.84	5428.7	5457.57	5657.7	5535.5	5442.17		950.4	6281.25	6708.03	6248.6	6289.87	6456.52	6431.19	6276.26
949.5	5668.75	5800.24	5419.18	5448.44	5654.64	5522.25	5432.45		950.3	6400	6696.91	6238.72	6280.53	6452.09	6414.48	6265.97
949.4	5618.75	5794.89	5410.42	5440.09	5652.62	5509.94	5423.5		950.2	6215.62	6686.89	6229.3	6271.67	6448.35	6398.62	6256.15
949.3	5600	5789.82	5401.45	5431.53	5650.69	5497.61	5414.34		950.1	6437.5	6676.86	6219.25	6262.2	6444.23	6382.48	6245.7
949.2	5781.25	5785.2	5392.44	5422.94	5649.03	5485.4	5405.14		950	6203.12	6668.29	6210.03	6253.56	6441.2	6367.52	6236.11
949.1	5565.62	5782.02	5384.37	5415.3	5648.66	5474.29	5396.89		949.9	6615.62	6659.5	6200.01	6244.14	6437.64	6352.05	6225.7
949	5590.62	5778.32	5375.27	5406.64	5647.59	5462.29	5387.61		949.8	6478.12	6652.83	6191.51	6236.24	6435.89	6338.39	6216.84
948.9	5621.88	5775.31	5366.34	5398.16	5647.06	5450.6	5378.51		949.7	6681.25	6646.29	6182.54	6227.89	6433.98	6324.52	6207.51
948.8	5484.38	5773.01	5357.61	5389.88	5647.12	5439.23	5369.61		949.6	6406.25	6641.1	6174.34	6220.32	6433.18	6311.66	6198.95
948.7	5746.88	5770.61	5348.24	5380.98	5646.93	5427.35	5360.07		949.5	6306.25	6635.54	6165.17	6211.81	6431.74	6298.06	6189.44
948.6	5231.25	5770.12	5340.22	5373.44	5648.53	5416.92	5351.88		949.4	6425	6630.25	6155.68	6202.97	6430.36	6284.35	6179.61
948.5	5800	5767.66	5329.68	5363.39	5648.03	5404.08	5341.18		949.3	6246.88	6626.03	6146.65	6194.62	6429.81	6271.3	6170.25
948.4	5603.12	5768.65	5322.01	5356.22	5650.89	5394.22	5333.36		949.2	6390.62	6621.81	6137.01	6185.67	6429.07	6257.82	6160.29
948.3	5668.75	5769.3	5313.41	5348.12	5653.27	5383.52	5324.6		949.1	6293.75	6618.78	6127.93	6177.28	6429.32	6245.07	6150.89
948.2	5609.38	5770.91	5305.17	5340.41	5656.53	5373.27	5316.22		949	6421.88	6616.06	6118.52	6168.6	6429.7	6232.17	6141.17
948.1	5506.25	5772.91	5296.68	5332.46	5660.07	5362.85	5307.58		948.9	5987.5	6614.5	6109.62	6160.43	6431.06	6219.91	6131.96
948	5484.38	5775.07	5287.72	5324.04	5663.68	5352.04	5298.48		948.8	6231.25	6612.08	6099.18	6150.74	6431.39	6206.27	6121.22
947.9	5365.62	5777.83	5278.7	5315.58	5667.8	5341.24	5289.31		948.7	6168.75	6611.27	6089.65	6141.98	6433.17	6193.67	6111.4
947.8	5450	5780.72	5269.13	5306.58	5671.95	5329.97	5279.6		948.6	6171.88	6610.98	6079.94	6133.05	6435.32	6181.02	6101.4
947.7	5596.88	5784.76	5260.03	5298.06	5677.19	5319.23	5270.36		948.5	6340.62	6611.46	6070.27	6124.18	6438.11	6168.53	6091.45
947.6	5593.75	5790.31	5251.7	5290.33	5683.85	5309.33	5261.9		948.4	6053.12	6613.36	6061.24	6115.98	6442.17	6156.79	6082.15
947.5	5625	5796.62	5243.4	5282.64	5691.18	5299.52	5253.47		948.3	6418.75	6615.03	6051.21	6106.78	6445.87	6144.17	6071.85
947.4	5650	5803.88	5235.29	5275.17	5699.39	5289.97	5245.23		948.2	5956.25	6618.86	6042.54	6098.97	6451.6	6133	6062.91
947.3	5428.12	5812.07	5227.35	5267.87	5708.47	5280.63	5237.17		948.1	6353.12	6621.9	6032.23	6089.53	6456.42	6120.29	6052.34
947.2	5793.75	5820	5218.35	5259.52	5717.21	5270.28	5228.04		948	6309.38	6627.26	6023.38	6081.59	6463.44	6109.14	6043.24
947.1	5787.5	5830.61	5211.2	5253.05	5728.56	5261.84	5220.78		947.9	6231.25	6633.4	6014.41	6073.54	6471.13	6097.95	6034.02
947	5468.75	5842.05	5204.07	5246.6	5740.67	5253.45	5213.52		947.8	6078.12	6640.2	6005.19	6065.26	6479.37	6086.6	6024.55
946.9	5815.62	5852.8	5195.38	5238.62	5752.04	5243.56	5204.72		947.7	6146.88	6647.44	5995.46	6056.49	6487.94	6074.81	6014.57
946.8	5465.62	5866.18	5188.46	5232.43	5765.96	5235.48	5197.68		947.6	6131.25	6655.95	5986	6048.02	6497.68	6063.38	6004.88
946.7	5790.62	5878.73	5179.84	5224.55	5779.01	5225.74	5188.94		947.5	6368.75	6665.45	5976.53	6039.56	6508.31	6051.99	5995.17
946.6	5806.25	5893.86	5172.87	5218.35	5794.56	5217.69	5181.86		947.4	6443.75	6676.89	5967.94	6032.01	6520.77	6041.57	5986.36
946.5	5853.12	5909.99	5166.01	5212.27	5811.06	5209.8	5174.9		947.3	6212.5	6689.69	5959.65	6024.78	6534.51	6031.51	5977.85
946.4	5565.62	5927.33	5159.43	5206.48	5828.71	5202.2	5168.2		947.2	6418.75	6702.79	5950.56	6016.78	6548.46	6020.71	5968.54
946.3	5743.75	5944.2	5151.44	5199.32	5845.83	5193.25	5160.12		947.1	6421.88	6717.82	5942.25	6009.58	6564.24	6010.75	5960.01
946.2	5762.5	5962.93	5144.38	5193.11	5864.76	5185.25	5152.95		947	6346.88	6734.04	5933.98	6002.45	6581.12	6000.88	5951.52
946.1	6018.75	5982.75	5137.45	5187.05	5884.73	5177.41	5145.92		946.9	6512.5	6751.22	5925.47	5995.11	6598.88	5990.83	5942.8
946	5865.62	6004.81	5131.83	5182.31	5906.87	5170.9	5140.2		946.8	6712.5	6770.23	5917.58	5988.43	6618.37	5981.46	5934.71
945.9	6137.5	6027.09	5125.47	5176.87	5929.19	5163.69	5133.74		946.7	6675	6791.22	5910.45	5982.53	6639.77	5972.89	5927.37
945.8	6175	6051.68	5120.49	5172.84	5953.76	5157.9	5128.67		946.6	6562.5	6813.38	5903.2	5976.55	6662.25	5964.25	5919.93
945.7	6181.25	6077.4	5115.73	5169.04	5979.4	5152.33	5123.81		946.5	6812.5	6836.42	5895.58	5970.23	6685.53	5955.28	5912.11
945.6	6434.38	6104.1	5111.02	5165.32	6005.98	5146.85	5119.01		946.4	6906.25	6861.7	5888.88	5964.86	6710.97	5947.28	5905.23
945.5	6350	6132.94	5107.59	5162.91	6034.64	5142.67	5115.49		946.3	6971.88	6888.63	5882.55	5959.9	6737.98	5939.69	5898.7
945.4	6528.12	6162.25	5103.76	5160.13	6063.72	5138.11	5111.57		946.2	6881.25	6917.12	5876.47	5955.23	6766.47	5932.39	5892.44
945.3	6271.88	6193.25	5100.83	5158.28	6094.43	5134.48	5108.55		946.1	7003.12	6946.64	5870.09	5950.3	6795.9	5924.83	5885.88
945.2	6753.12	6223.76	5096.65	5155.2	6124.6	5129.61	5104.28		946	7375	6977.9	5864.17	5945.87	6827	5917.77	5879.79
945.1	6831.25	6257.4	5094.87	5154.57	6157.84	5127.18	5102.42		945.9	7537.5	7011.84	5859.62	5942.84	6860.69	5912.1	5875.05
945	6903.12	6292.04	5093.49	5154.36	6192.04	5125.16	5100.96		945.8	7062.5	7047.61	5855.66	5940.45	6896.15	5907.07	5870.93
944.9	6650	6327.62	5092.47	5154.56	6227.11	5123.52	5099.86		945.7	7728.12	7082.93	5850.01	5936.41	6931.07	5900.38	5865.1
944.8	6871.88	6362.39	5090.21	5153.54	6261.31	5120.65	5097.51		945.6	7453.12	7121.88	5846.78	5934.84	6969.54	5896.13	5861.7
944.7	7043.75	6398.6	5089.05	5153.67	6296.91	5118.9	5096.28		945.5	7571.88	7160.96	5842.56	5932.34	7008.05	5890.93	5857.33
944.6	6684.38	6435.92	5088.76	5154.7	6333.55	5118.04	5095.9		945.4	7706.25	7201.57	5838.8	5930.33	7048.02	5886.21	5853.4
944.5	6971.88	6471.51	5086.68	5153.98	6368.41	5115.4	5093.75		945.3	7903.12	7243.62	5835.52	5928.87	7089.35	5882.01	5849.97
944.4	6859.38	6508.48	5086.04	5154.75	6404.59	5114.22	5093.03		945.2	7909.38	7287.27	5832.98	5928.18	7132.19	5878.56	5847.26
944.3	6862.5	6544.61	5084.84	5155.01	6439.87	5112.5	5091.76		945.1	7718.75	7331.73	5830.46	5927.58	7175.76	5875.17	5844.59
944.2	6893.75	6580.33	5083.67	5155.33	6474.68	5110.82	5090.51		945	7921.88	7376.07	5827.26	5926.36	7219.12	5871.12	5841.24
944.1	6846.88	6615.58	5082.66	5155.86	6508.95	5109.31	5089.43		944.9	8009.38	7421.62	5824.81	5925.94	7263.61	5867.85	5838.64
944	6868.75	6649.71	5081.41	5156.22	6542.04	5107.59	5088.11		944.8	8015.62	7467.69	5822.68	5925.92	7308.53	5864.91	5836.36
943.9	6915.62	6682.88	5080.29	5156.74	6574.1	5105.99	5086.92		944.7	7909.38	7513.81	5820.58	5925.98	7353.41	5862.04	5834.12
943.8	6687.5	6714.92	5079.4	5157.55	6604.97	5104.65	5085.96		944.6	8246.88	7559.35	5818.1	5925.74	7397.61	5858.8	5831.5
943.7	6731.25	6744.24	5077.39	5157.29	6633.04	5102.18	5083.88		944.5	8240.62	7605.57	5816.86	5926.8	7442.41	5856.81	5830.11
943.6	6771.88	6771.96	5075.6	5157.32	6659.44	5099.96	5082.02		944.4	7896.88	7651	5815.59	5927.91	7486.32	5854.83	5828.71
943.5	6784.38	6797.78	5074.02	5157.63	6683.87	5097.96	5080.38		944.3	7987.5	7694.04	5813.09	5927.87	7527.74	5851.63	5826.07
943.4	6484.38	6821.34	5072.51	5158.06	6705.96	5096.04	5078.81		944.2	7921.88	7735.94	5810.92	5928.24	7567.91	5848.78	5823.77
943.3	6818.75	6840.82	5069.52	5157.09	6723.9	5092.65	5075.75		944.1	7640.62	7775.79	5808.53	5928.46	7605.94	5845.72	5821.25
943.2	7037.5	6859.19	5068.2	5157.86	6740.63	5090.94	5074.37		944	7940.62	7812.41	5805.13	5927.77	7640.63	5841.68	5817.72
943.1	6581.25	6875.68	5067.98	5159.79	6755.41	5090.34	5074.09		943.9	7925	7847.56	5802.82	5928.27	7673.73	5838.74	5815.29
943	6584.38	6886.75	5065.49	5159.54	6764.67	5087.48	5071.54		943.8	7800	7879.68	5800.47	5928.81	7703.7	5835.77	5812.81
942.9	6587.5	6894.57	5063.04	5159.41	6770.59	5084.66	5069.02		943.7	7971.88	7908.03	5797.67	5929.01	7729.78	5832.38	5809.89
942.8	6631.25	6899.03	5060.6	5159.38	6773.06	5081.87	5066.53		943.6	7921.88	7933.38	5795.51	5929.94	7752.73	5829.63	5807.6
942.7	6931.25	6900.3	5058.4	5159.67	6772.24	5079.33	5064.27		943.5	7778.12	7954.56	5793.17	5930.81	7771.39	5826.72	5805.14
942.6	6706.25	6899.63	5057.7	5161.56	6769.37	5078.29	5063.51		943.4	7465.62	7971.01	5790.32	5931.29	7785.19	5823.32	5802.18
942.5	6668.75	6894.43	5055.89	5162.44	6761.87	5076.14	5061.64		943.3	7621.88	7981.88	5786.36	5930.77	7793.27	5818.81	5798.1
942.4	6709.38	6885.72	5053.89	5163.24	6750.74	5073.83	5059.59		943.2	7887.5	7988.72	5782.97	5930.95	7797.18	5814.9	5794.6
942.3	6740.62	6873.99	5052.11	5164.36	6736.47	5071.73	5057.76		943.1	7890.62	7991.82	5780.55	5932.24	7797.21	5811.97	5792.06
942.2	6434.38	6859.35	5050.5	5165.76	6719.17	5069.81	5056.08		943	7696.88	7990.2	5778.16	5933.68	7792.37	5809.07	5789.56
942.1	6765.62	6840.28	5047.37	5165.78	6697.32	5066.38	5052.9		942.9	7387.5	7983.2	5775.07	5934.58	7781.98	5805.49	5786.36
942	6581.25	6820.2	5045.9	5167.58	6674.31	5064.62	5051.38		942.8	7787.5	7970.52	5770.88	5934.53	7765.74	5800.82	5782.06
941.9	6615.62	6796.73	5043.52	5168.61	6647.78	5061.96	5048.95		942.7	7678.12	7954.87	5768.15	5936.09	7746.38	5797.61	5779.22
941.8	6206.25	6771.25	5041.32	5169.96	6619.07	5059.48	5046.7		942.6	7687.5	7934.65	5765.03	5937.45	7722.24	5794.04	5776
941.7	6531.25	6741.78	5037.11	5169.44	6586.24	5055	5042.44		942.5	7578.12	7910.57	5761.95	5939.02	7694.07	5790.52	5772.82
941.6	6565.62	6712.24	5034.53	5170.72	6553.15	5052.15	5039.81		942.4	7753.12	7882.51	5758.5	5940.4	7661.72	5786.62	5769.26
941.5	6618.75	6681.47	5032.13	5172.35	6518.66	5049.49	5037.36		942.3	7468.75	7851.88	5755.68	5942.61	7626.59	5783.39	5766.35
941.4	6690.62	6649.78	5030.01	5174.43	6483.08	5047.11	5035.19		942.2	7528.12	7817.39	5751.86	5944.02	7587.38	5779.14	5762.42
941.3	6634.38	6617.56	5028.25	5177.07	6446.76	5045.1	5033.38		942.1	7684.38	7780.63	5748.26	5945.88	7545.67	5775.13	5758.72
941.2	6828.12	6584.4	5026.23	5179.63	6409.29	5042.84	5031.31		942	7537.5	7742.4	5745.23	5948.54	7502.25	5771.71	5755.6
941.1	6396.88	6551.73	5025.17	5183.39	6372.11	5041.54	5030.21		941.9	7421.88	7701.94	5741.69	5950.93	7456.34	5767.78	5751.96
941	6753.12	6516.73	5021.98	5185.23	6332.35	5038.12	5026.98		941.8	7509.38	7659.79	5737.74	5953.18	7408.48	5763.45	5747.92
940.9	6525	6483.46	5020.58	5189.1	6294.08	5036.48	5025.52		941.7	7478.12	7617.03	5734.13	5956.03	7359.71	5759.46	5744.21
940.8	6487.5	6449.24	5018.05	5192.09	6254.61	5033.73	5022.95		941.6	7562.5	7573.54	5730.41	5959.07	7309.92	5755.38	5740.4
940.7	6365.62	6415.18	5015.34	5195.18	6215.01	5030.81	5020.2		941.5	7628.12	7530.11	5727.01	5962.74	7259.87	5751.62	5736.91
940.6	6600	6380.99	5012.05	5197.97	6175	5027.3	5016.86		941.4	7684.38	7486.92	5723.86	5966.99	7209.72	5748.12	5733.68
940.5	6381.25	6348.63	5009.93	5202.25	6136.49	5024.97	5014.7		941.3	7496.88	7444.24	5720.93	5971.8	7159.73	5744.84	5730.65
940.4	6606.25	6315.93	5006.74	5205.79	6097.31	5021.57	5011.47		941.2	7465.62	7401.43	5717.32	5976.32	7109.22	5740.9	5726.96
940.3	6306.25	6285.25	5004.68	5210.81	6059.8	5019.31	5009.37		941.1	7443.75	7359.24	5713.62	5981.14	7058.92	5736.87	5723.18
940.2	6400	6254.07	5001.14	5214.73	6021.4	5015.57	5005.79		941	7775	7317.97	5709.86	5986.32	7009.1	5732.79	5719.33
940.1	6656.25	6224.44	4998.09	5219.55	5984.13	5012.33	5002.69		940.9	7256.25	7279	5707.3	5993.17	6961.12	5729.91	5716.68
940	6400	6197.27	4996.32	5226.09	5948.88	5010.37	5000.89		940.8	7131.25	7239.49	5702.88	5998.65	6912.1	5725.18	5712.18
939.9	6050	6170.07	4993.29	5231.85	5913.12	5007.15	4997.82		940.7	7359.38	7200.97	5698.02	6004.23	6863.54	5720.03	5707.25
939.8	6240.62	6142.48	4988.53	5236.39	5876.45	5002.22	4993.02		940.6	7503.12	7164.83	5694.01	6011.23	6816.77	5715.72	5703.15
939.7	6309.38	6117.26	4984.75	5242.46	5841.59	4998.25	4989.2		940.5	7090.62	7130.93	5690.53	6019.37	6771.61	5711.94	5699.59
939.6	6168.75	6093.86	4981.33	5249.51	5807.93	4994.65	4985.74		940.4	7331.25	7097.33	5685.57	6026.72	6726.06	5706.7	5694.56
939.5	6481.25	6071.33	4977.22	5256.54	5774.48	4990.38	4981.6		940.3	7190.62	7066.52	5681.5	6035.68	6682.58	5702.35	5690.41
939.4	6209.38	6051.98	4974.69	5265.87	5743.47	4987.68	4979.03		940.2	7356.25	7037.21	5676.94	6044.95	6639.79	5697.52	5685.77
939.3	6450	6032.99	4970.82	5274.66	5712.03	4983.64	4975.12		940.1	7378.12	7010.59	5672.99	6055.71	6598.8	5693.3	5681.75
939.2	5915.62	6016.99	4968.16	5285.54	5682.69	4980.82	4972.43		940	7106.25	6986.26	5669.14	6067.51	6559.15	5689.18	5677.82
939.1	6106.25	6000.21	4962.87	5294.76	5651.59	4975.37	4967.1		939.9	6993.75	6963.23	5664.31	6079.39	6519.74	5684.1	5672.92
939	6193.75	5986.38	4958.54	5306.03	5622.36	4970.89	4962.74		939.8	7262.5	6942.2	5659.1	6092.03	6481.2	5678.64	5667.64
938.9	6025	5975.07	4954.68	5318.96	5594.45	4966.87	4958.84		939.7	6965.62	6924.64	5654.88	6106.91	6444.86	5674.17	5663.35
938.8	6140.62	5965.15	4949.99	5332.39	5566.59	4962.03	4954.12		939.6	7196.88	6908.63	5649.6	6122.13	6408.65	5668.65	5658
938.7	6093.75	5958.17	4945.9	5347.91	5540.19	4957.79	4949.99		939.5	7168.75	6896.19	5645.18	6139.72	6374.52	5663.98	5653.5
938.6	5690.62	5953.47	4941.6	5364.88	5514.39	4953.35	4945.66		939.4	7096.88	6886.53	5640.67	6158.92	6341.46	5659.24	5648.93
938.5	6043.75	5949.47	4935.32	5381.72	5487.44	4946.92	4939.34		939.3	7065.62	6879.64	5635.91	6179.7	6309.32	5654.25	5644.1
938.4	5950	5950.12	4930.82	5402.42	5463.07	4942.28	4934.81		939.2	7109.38	6875.81	5631.06	6202.42	6278.22	5649.18	5639.19
938.3	6365.62	5953.43	4925.88	5424.97	5439.05	4937.21	4929.84		939.1	7290.62	6875.5	5626.39	6227.56	6248.38	5644.28	5634.45
938.2	6221.88	5962.16	4923.03	5452.19	5417.88	4934.22	4926.96		939	7043.75	6879.39	5622.39	6255.81	6220.3	5640.06	5630.38
938.1	6075	5973.81	4919.48	5481.6	5396.74	4930.54	4923.38		938.9	7115.62	6886.14	5617.51	6285.89	6192.37	5634.97	5625.44
938	5918.75	5988.66	4915.22	5513.46	5375.62	4926.14	4919.08		938.8	7059.38	6897.11	5612.91	6319.16	6165.74	5630.16	5620.77
937.9	6050	6007	4910.2	5548.13	5354.44	4921	4914.03		938.7	6881.25	6912.09	5608.12	6355.45	6139.91	5625.16	5615.92
937.8	6031.25	6030.58	4905.86	5587.35	5334.61	4916.53	4909.66		938.6	7062.5	6930.9	5602.7	6394.64	6114.39	5619.55	5610.44
937.7	6175	6059.05	4901.45	5630.81	5315.37	4911.99	4905.22		938.5	7393.75	6955.08	5597.97	6438.27	6090.46	5614.61	5605.64
937.6	6046.88	6093.64	4897.77	5679.75	5297.48	4908.2	4901.51		938.4	7471.88	6985.48	5594.44	6487.24	6068.61	5610.88	5602.05
937.5	6146.88	6133.34	4893.47	5733.2	5279.59	4903.78	4897.19		938.3	7043.75	7021.43	5591.2	6540.9	6047.92	5607.45	5598.75
937.4	6359.38	6179.78	4889.7	5792.8	5262.8	4899.89	4893.38		938.2	7096.88	7061.42	5586.43	6597.79	6026.5	5602.5	5593.93
937.3	6087.5	6233.89	4886.99	5859.5	5247.66	4897.07	4890.65		938.1	7468.75	7107.54	5581.88	6660.03	6006.07	5597.76	5589.31
937.2	6262.5	6293.72	4882.95	5931.37	5231.72	4892.92	4886.58		938	7484.38	7161.16	5578.67	6729.02	5987.74	5594.37	5586.05
937.1	6084.38	6361.96	4879.8	6011.14	5217.18	4889.65	4883.4		937.9	7240.62	7221.38	5575.54	6803.89	5970.19	5591.06	5582.86
937	6450	6437.18	4875.78	6097.38	5202.28	4885.52	4879.35		937.8	7206.25	7287.48	5571.54	6883.94	5952.47	5586.88	5578.8
936.9	6456.25	6522.56	4873.6	6193.3	5189.68	4883.23	4877.14		937.7	7168.75	7360.52	5567.43	6970.3	5935.28	5582.6	5574.64
936.8	6437.5	6616.5	4871.46	6297.33	5177.59	4880.98	4874.97		937.6	7212.5	7440.81	5563.2	7063.28	5918.59	5578.2	5570.35
936.7	6600	6719.21	4869.23	6409.67	5165.85	4878.65	4872.72		937.5	7525	7528.77	5559.14	7163.32	5902.66	5573.97	5566.24
936.6	6809.38	6831.79	4867.82	6531.49	5155.34	4877.15	4871.29		937.4	7662.5	7625.64	5556.23	7271.72	5888.44	5570.89	5563.27
936.5	7031.25	6954.38	4867.47	6662.9	5146.29	4876.68	4870.9		937.3	7484.38	7730.79	5553.81	7387.85	5875.26	5568.32	5560.8
936.4	6825	7087.02	4868.21	6803.99	5138.71	4877.33	4871.62		937.2	8056.25	7843.18	5550.77	7510.72	5861.95	5565.12	5557.71
936.3	7309.38	7227.05	4867.92	6952.09	5130.47	4876.94	4871.31		937.1	7925	7965.54	5549.8	7643.07	5851.19	5563.99	5556.68
936.2	7337.5	7377.28	4870.04	7110.06	5124.98	4878.97	4873.4		937	8168.75	8094.98	5548.35	7782.04	5840.42	5562.39	5555.19
936.1	7750	7534.49	4872.3	7274.68	5119.94	4881.13	4875.63		936.9	8321.88	8232.66	5547.8	7928.83	5830.96	5561.68	5554.58
936	7703.12	7698.86	4876.58	7446.14	5117.25	4885.32	4879.89		936.8	8315.62	8377.55	5547.79	8082.4	5822.47	5561.53	5554.52
935.9	7790.62	7866.22	4880.61	7620.3	5114.61	4889.26	4883.9		936.7	8346.88	8528.35	5547.76	8241.5	5814.34	5561.35	5554.44
935.8	8303.12	8034.32	4885.06	7794.9	5112.66	4893.62	4888.33		936.6	8768.75	8684.2	5547.85	8405.28	5806.69	5561.29	5554.48
935.7	8337.5	8201.93	4892.03	7968.76	5113.51	4900.5	4895.27		936.5	8843.75	8844.88	5549.45	8573.55	5800.9	5562.76	5556.04
935.6	8587.5	8362.68	4899.14	8135.49	5114.74	4907.52	4902.35		936.4	8906.25	9007.5	5551.32	8743.42	5795.71	5564.48	5557.86
935.5	8571.88	8512.76	4907.45	8291.31	5117.42	4915.75	4910.64		936.3	9378.12	9169.53	5553.41	8912.4	5791.04	5566.44	5559.9
935.4	8615.62	8645.92	4915.65	8429.98	5120.21	4923.85	4918.81		936.2	9240.62	9329.85	5557.19	9079.36	5788.36	5570.08	5563.63
935.3	9012.5	8757.18	4924.02	8546.54	5123.39	4932.14	4927.16		936.1	9356.25	9483.19	5560.46	9239.07	5785.44	5573.22	5566.86
935.2	9209.38	8843.65	4934.31	8638.09	5128.71	4942.36	4937.44		936	9196.88	9626.77	5564.14	9388.75	5783.19	5576.76	5570.49
935.1	9259.38	8900.47	4945.54	8699.8	5135.15	4953.5	4948.64		935.9	9653.12	9756	5567.23	9523.84	5780.6	5579.72	5573.53
935	8784.38	8924.29	4956.96	8728.32	5141.97	4964.84	4960.03		935.8	9981.25	9869.12	5571.95	9642.58	5779.87	5584.32	5578.2
934.9	8981.25	8911.64	4965.96	8720.19	5146.54	4973.76	4969.02		935.7	10021.9	9962.09	5577.84	9740.95	5780.53	5590.08	5584.05
934.8	8990.62	8866.76	4975.9	8679.67	5152.22	4983.62	4978.93		935.6	9806.25	10030.7	5583.85	9814.75	5781.52	5595.97	5590.02
934.7	9206.25	8791.24	4985.83	8608.35	5158.06	4993.48	4988.84		935.5	10421.9	10071.4	5589.06	9860.46	5781.9	5601.06	5595.19
934.6	8784.38	8689.89	4996.78	8511.04	5165.06	5004.35	4999.77		935.4	9978.12	10085.7	5596.48	9879.59	5784.67	5608.35	5602.55
934.5	8881.25	8564.38	5005.59	8389.44	5170.06	5013.09	5008.56		935.3	10212.5	10069.4	5602.26	9867.84	5785.99	5614.02	5608.3
934.4	8303.12	8422.27	5014.83	8251.09	5175.63	5022.26	5017.78		935.2	10312.5	10025.4	5608.87	9828.36	5788.3	5620.51	5614.87
934.3	8553.12	8265.42	5021.15	8097.88	5178.41	5028.51	5024.08		935.1	10368.8	9955.12	5615.82	9762.35	5791.11	5627.35	5621.77
934.2	8140.62	8102.56	5028.69	7938.52	5182.53	5035.98	5031.6		935	10146.9	9861.03	5622.95	9672.42	5794.24	5634.36	5628.85
934.1	7781.25	7934.36	5034.14	7773.72	5184.68	5041.35	5037.03		934.9	10078.1	9745.36	5629.25	9560.75	5796.68	5640.55	5635.11
934	7678.12	7764.7	5037.78	7607.34	5185.12	5044.92	5040.65		934.8	10203.1	9612.48	5635.27	9431.74	5799	5646.47	5641.1
933.9	7709.38	7597.35	5040.89	7443.17	5185.15	5047.97	5043.74		934.7	9475	9466.84	5641.73	9289.84	5801.86	5652.82	5647.52
933.8	7312.5	7435.27	5044.14	7284.15	5185.41	5051.15	5046.97		934.6	9756.25	9308.96	5645.55	9135.57	5802.2	5656.52	5651.29
933.7	7428.12	7277.71	5045.4	7129.57	5183.78	5052.34	5048.21		934.5	9375	9146.11	5650.35	8976.23	5803.66	5661.23	5656.06
933.6	7012.5	7128.18	5047.23	6982.93	5182.81	5054.11	5050.02		934.4	8962.5	8978.75	5653.78	8812.25	5803.84	5664.54	5659.44
933.5	7150	6984.88	5046.98	6842.42	5179.86	5053.8	5049.76		934.3	8887.5	8809.57	5655.7	8646.36	5802.62	5666.36	5661.33
933.4	6887.5	6850.76	5047.43	6711.02	5177.67	5054.18	5050.18		934.2	8909.38	8641.86	5657.34	8481.82	5801.22	5667.91	5662.93
933.3	6903.12	6724.12	5046.56	6587	5174.26	5053.25	5049.3		934.1	8537.5	8477.59	5659.06	8320.63	5799.99	5669.52	5664.61
933.2	7037.5	6606.22	5045.78	6471.65	5171	5052.41	5048.5		934	8365.62	8316.88	5659.43	8162.91	5797.51	5669.8	5664.94
933.1	7150	6497.39	5045.67	6365.3	5168.49	5052.24	5048.37		933.9	8287.5	8161.27	5659.18	8010.2	5794.49	5669.45	5664.66
933	6656.25	6397.39	5046.12	6267.71	5166.61	5052.62	5048.8		933.8	8375	8011.99	5658.65	7863.75	5791.28	5668.83	5664.09
932.9	6525	6302.73	5044.11	6175.39	5162.34	5050.56	5046.77		933.7	8040.62	7870.05	5658.44	7724.53	5788.46	5668.52	5663.84
932.8	6687.5	6214.94	5041.46	6089.88	5157.49	5047.85	5044.11		933.6	7496.88	7734.1	5657.02	7591.25	5784.52	5667.01	5662.39
932.7	6434.38	6134.99	5039.64	6012.14	5153.52	5045.97	5042.26		933.5	7728.12	7603.71	5653.65	7463.44	5778.69	5663.55	5658.98
932.6	6312.5	6060.32	5036.56	5939.62	5148.37	5042.84	5039.17		933.4	8040.62	7481.52	5651.12	7343.76	5773.78	5660.93	5656.42
932.5	6309.38	5991.22	5032.9	5872.62	5142.68	5039.12	5035.49		933.3	7543.75	7367.89	5649.73	7232.56	5770.07	5659.45	5655
932.4	6159.38	5927.74	5029.23	5811.18	5137.05	5035.4	5031.81		933.2	7240.62	7259.64	5646.56	7126.69	5764.65	5656.19	5651.79
932.3	5959.38	5868.78	5024.84	5754.21	5130.75	5030.95	5027.4		933.1	7737.5	7157.22	5642.3	7026.58	5758.2	5651.85	5647.49
932.2	6215.62	5813.62	5019.48	5700.98	5123.52	5025.54	5022.02		933	7112.5	7063.36	5639.85	6934.97	5753.62	5649.31	5645.01
932.1	5675	5764.08	5015.42	5653.33	5117.65	5021.43	5017.95		932.9	7093.75	6973.61	5635.16	6847.42	5746.85	5644.53	5640.28
932	5750	5715.86	5008.7	5606.94	5109.15	5014.65	5011.21		932.8	7093.75	6889.95	5630.41	6765.89	5740.09	5639.7	5635.5
931.9	5650	5671.6	5002.38	5564.47	5101.11	5008.28	5004.87		932.7	7090.62	6812.07	5625.68	6690.09	5733.4	5634.9	5630.74
931.8	5900	5630.13	4995.59	5524.75	5092.64	5001.44	4998.07		932.6	6765.62	6739.57	5620.96	6619.61	5726.77	5630.09	5625.99
931.7	5481.25	5592.85	4990.08	5489.17	5085.49	4995.88	4992.54		932.5	6637.5	6671.04	5615.09	6553.06	5719.03	5624.14	5620.08
931.6	5359.38	5556.11	4982.52	5454.1	5076.34	4988.27	4984.97		932.4	6478.12	6606.78	5608.77	6490.72	5710.9	5617.74	5613.73
931.5	5268.75	5521.18	4974.39	5420.79	5066.65	4980.09	4976.82		932.3	6615.62	6546.41	5601.9	6432.23	5702.26	5610.8	5606.83
931.4	5446.88	5487.93	4965.85	5389.12	5056.59	4971.51	4968.27		932.2	6237.5	6490.65	5595.56	6378.3	5694.19	5604.37	5600.45
931.3	4975	5457.5	4958.24	5360.25	5047.5	4963.85	4960.64		932.1	6365.62	6437.3	5587.87	6326.73	5684.82	5596.61	5592.74
931.2	5143.75	5426.47	4948.32	5330.73	5036.13	4953.88	4950.71		932	6193.75	6387.94	5580.67	6279.12	5675.99	5589.34	5585.51
931.1	5040.62	5397.84	4939.3	5303.56	5025.69	4944.81	4941.66		931.9	6078.12	6341.16	5572.88	6234.04	5666.6	5581.47	5577.69
931	4953.12	5370.11	4929.8	5277.28	5014.81	4935.26	4932.15		931.8	5943.75	6296.94	5564.7	6191.48	5656.86	5573.22	5569.48
930.9	4940.62	5343.22	4919.91	5251.8	5003.58	4925.33	4922.25		931.7	5796.88	6254.94	5556.06	6151.1	5646.71	5564.51	5560.81
930.8	5106.25	5317.44	4910.02	5227.39	4992.37	4915.39	4912.34		931.6	5846.88	6214.87	5546.93	6112.61	5636.09	5555.31	5551.65
930.7	5053.12	5293.53	4900.99	5204.83	4982.06	4906.32	4903.3		931.5	5915.62	6177.25	5538.01	6076.55	5625.73	5546.32	5542.7
930.6	5168.75	5270.31	4891.75	5182.92	4971.55	4897.03	4894.04		931.4	5821.88	6141.93	5529.38	6042.74	5615.67	5537.61	5534.03
930.5	4853.12	5248.54	4883.12	5162.44	4961.7	4888.36	4885.4		931.3	5834.38	6108.17	5520.43	6010.45	5605.35	5528.6	5525.06
930.4	5040.62	5226	4872.97	5141.15	4950.35	4878.17	4875.24		931.2	5725	6076.16	5511.56	5979.88	5595.13	5519.66	5516.16
930.3	4987.5	5205.14	4863.81	5121.52	4940.01	4868.96	4866.06		931.1	5896.88	6045.3	5502.33	5950.44	5584.58	5510.36	5506.9
930.2	4837.5	5184.69	4854.42	5102.28	4929.48	4859.53	4856.66		931	5493.75	6016.5	5493.75	5923.02	5574.72	5501.72	5498.29
930.1	5056.25	5164.13	4844.34	5082.89	4918.27	4849.41	4846.56		930.9	5843.75
930	4956.25	5145.24	4835.39	5065.16	4908.23	4840.42	4837.6		930.8	5637.5
929.9	4915.62	5126.4	4825.99	5047.44	4897.75	4830.98	4828.19		930.7	5581.25
929.8	4915.62	5107.88	4816.43	5030.02	4887.15	4821.39	4818.62		930.6	5634.38
929.7	4796.88	5089.83	4806.93	5013.06	4876.61	4811.84	4809.1		930.5	5450
929.6	4762.5								930.4	5521.88
929.5	4959.38								930.3	5575
929.4	4850								930.2	5556.25
929.3	4606.25								930.1	5484.38
929.2	4850								930	5681.25
929.1	4953.12								929.9	5731.25
929	5125								929.8	5490.62
928.9	4978.12								929.7	5934.38
928.8	4915.62								929.6	5762.5
928.7	4818.75								929.5	5659.38
928.6	4978.12								929.4	5706.25
928.5	4881.25								929.3	5475
928.4	4771.88								929.2	5862.5
928.3	4918.75								929.1	5531.25
928.2	4787.5								929	5562.5
928.1	4915.62								928.9	5434.38
928	5093.75								928.8	5678.12
927.9	4650								928.7	5512.5
927.8	4787.5								928.6	5471.88
927.7	4762.5								928.5	5787.5
927.6	4787.5								928.4	5378.12
927.5	4906.25								928.3	5459.38
927.4	5150								928.2	5650
927.3	4815.62								928.1	5346.88
927.2	4821.88								928	5684.38
927.1	4771.88								927.9	5506.25
927	4690.62								927.8	5481.25
926.9	4787.5								927.7	5475
926.8	4615.62								927.6	5503.12
									927.5	5365.62
									927.4	5537.5
									927.3	5484.38
									927.2	5587.5
									927.1	5540.62
									927	5571.88
									926.9	5434.38
									926.8	5243.75

## Sheet: Figure 1g
Ni/POM					Ni/POM@MOF					Ni-foil					energy NiO
energy i0 ifluor mufluor					energy i0 ifluor mufluor					energy i0 itrans mutrans					8137.7040 0.71016721E-02
8132.99	0.5803	0.007064	0.012173		8132.99	0.582707	0.008315	0.01427		8133	0.094174	0.059884	0.452738		8142.7056 0.66816525E-02
8138.01	0.581266	0.007329	0.012609		8138.01	0.582281	0.008577	0.01473		8138.01	0.094594	0.060502	0.446923		8147.7049 0.63643059E-02
8143.01	0.579441	0.007299	0.012596		8143	0.581953	0.008647	0.014859		8143	0.095127	0.061123	0.442326		8152.7062 0.58032431E-02
8148	0.578733	0.007114	0.012293		8148	0.580947	0.008469	0.014578		8148	0.095672	0.061741	0.437975		8157.7051 0.53539983E-02
8152.54	0.581264	0.007283	0.01253		8152.6	0.586071	0.0085	0.014504		8153	0.09702	0.062957	0.432469		8162.7060 0.49124765E-02
8157.55	0.580756	0.007294	0.01256		8157.79	0.586147	0.008576	0.014632		8158	0.097766	0.063812	0.426636		8167.7046 0.44197696E-02
8162.99	0.582237	0.0072	0.012367		8162.64	0.585608	0.008647	0.014765		8162.84	0.098782	0.064828	0.421175		8172.7051 0.41218700E-02
8167.99	0.586737	0.007527	0.012829		8167.77	0.584858	0.00869	0.014859		8167.99	0.099394	0.065605	0.415438		8177.7076 0.37180960E-02
8172.73	0.584844	0.007574	0.01295		8172.99	0.584586	0.008864	0.015162		8172.99	0.099957	0.066351	0.409776		8182.7076 0.31858075E-02
8177.99	0.586875	0.007673	0.013075		8177.99	0.586679	0.008888	0.01515		8177.8	0.100608	0.06712	0.404756		8187.7052 0.28430923E-02
8182.79	0.587478	0.007694	0.013097		8182.99	0.584712	0.008918	0.015252		8182.99	0.101855	0.068338	0.399076		8192.7048 0.25166258E-02
8187.99	0.589886	0.007639	0.01295		8187.8	0.585178	0.009078	0.015513		8187.83	0.102716	0.069342	0.39292		8197.7062 0.21653435E-02
8193	0.591081	0.007658	0.012956		8192.99	0.587097	0.009045	0.015405		8192.83	0.103334	0.07013	0.387612		8202.7052 0.17588465E-02
8197.82	0.591763	0.007751	0.013098		8197.84	0.585615	0.009137	0.015602		8198	0.10462	0.071361	0.382592		8207.7060 0.14069440E-02
8203	0.585959	0.007814	0.013336		8203	0.586105	0.009084	0.015499		8203	0.104979	0.071953	0.377747		8212.7044 0.98153219E-03
8207.99	0.586393	0.0077	0.013131		8207.83	0.586717	0.009156	0.015605		8207.81	0.10584	0.072903	0.372799		8217.7046 0.70819841E-03
8213	0.587107	0.007833	0.013342		8213	0.585301	0.009298	0.015886		8212.87	0.106716	0.073892	0.367557		8222.7067 0.27968911E-03
8217.99	0.586396	0.007862	0.013408		8217.83	0.586594	0.009223	0.015723		8218	0.107418	0.074791	0.362031		8227.7063 0.10422001E-03
8222.99	0.585926	0.007972	0.013605		8222.83	0.587781	0.009371	0.015944		8222.99	0.108165	0.075699	0.356884		8232.7077 -0.93222876E-04
8227.99	0.590544	0.007918	0.013408		8227.82	0.58613	0.009325	0.01591		8227.82	0.109223	0.076816	0.351979		8237.7065 -0.34697786E-03
8232.81	0.590601	0.007993	0.013533		8232.8	0.586721	0.009299	0.01585		8233	0.109593	0.077464	0.346954		8242.7071 -0.61767456E-03
8237.8	0.591564	0.00815	0.013777		8237.99	0.587589	0.009453	0.016088		8237.99	0.110761	0.078669	0.342121		8247.7051 -0.95537237E-03
8242.84	0.591994	0.008082	0.013652		8242.99	0.587469	0.00963	0.016393		8242.99	0.111515	0.079608	0.337045		8252.7049 -0.11633272E-02
8247.82	0.590179	0.008213	0.013915		8248	0.587523	0.009547	0.01625		8248	0.111905	0.080241	0.332615		8257.7065 -0.13122323E-02
8253	0.58754	0.008155	0.01388		8253	0.588532	0.009642	0.016384		8253	0.11301	0.081428	0.327755		8262.7055 -0.15129095E-02
8257.84	0.585026	0.008221	0.014053		8258	0.584736	0.009796	0.016752		8257.82	0.113068	0.081799	0.323731		8267.7062 -0.16396701E-02
8262.84	0.586631	0.008198	0.013975		8263	0.587713	0.009813	0.016696		8263	0.114277	0.083119	0.31835		8272.7043 -0.17669784E-02
8268	0.586895	0.008236	0.014033		8268	0.586231	0.009713	0.016569		8267.56	0.115157	0.084144	0.313772		8277.7041 -0.18053857E-02
8273	0.582157	0.008394	0.014418		8273	0.583933	0.009904	0.016962		8272.85	0.115133	0.084536	0.308917		8282.7057 -0.19698021E-02
8277.58	0.578829	0.008375	0.01447		8278	0.58421	0.009973	0.01707		8277.56	0.115088	0.084848	0.304834		8287.7045 -0.18471841E-02
8283	0.579344	0.008379	0.014463		8283.01	0.584149	0.010149	0.017375		8282.83	0.11582	0.085771	0.300359		8292.7050 -0.17305482E-02
8287.56	0.584733	0.008617	0.014736		8287.87	0.583808	0.010238	0.017537		8288	0.117031	0.087005	0.296471		8297.7073 -0.14457129E-02
8292.56	0.587195	0.008736	0.014877		8292.85	0.584993	0.010239	0.017503		8292.56	0.118087	0.088044	0.293577		8302.7068 -0.10708437E-02
8297.58	0.5892	0.008875	0.015064		8297.56	0.587064	0.010332	0.017599		8297.57	0.11914	0.08906	0.290989		8307.7080 -0.57416068E-03
8302.86	0.588104	0.008916	0.01516		8302.55	0.587956	0.010544	0.017934		8303.01	0.119951	0.089713	0.290469		8308.0056 -0.51217440E-03
8307.84	0.587468	0.009148	0.015573		8308	0.588168	0.010804	0.018369		8307.54	0.120253	0.089688	0.293265		8308.3077 -0.49381401E-03
8312.84	0.587682	0.009615	0.016362		8312.85	0.588852	0.011111	0.018869		8312.56	0.12105	0.088829	0.309483		8308.6053 -0.46447384E-03
8317.87	0.589377	0.011266	0.019116		8317.78	0.589225	0.012406	0.021054		8317.85	0.121243	0.05956	0.710815		8308.9074 -0.44566392E-03
8318.3	0.590482	0.011135	0.018858		8318.3	0.589084	0.012301	0.020881		8318.3	0.121197	0.055016	0.789782		8309.2051 -0.38459965E-03
8318.6	0.590744	0.010991	0.018606		8318.6	0.588396	0.012318	0.020935		8318.6	0.12159	0.052618	0.8376		8309.5073 -0.28628423E-03
8318.9	0.590366	0.010909	0.018478		8318.9	0.588601	0.012268	0.020843		8318.9	0.121589	0.050476	0.879153		8309.8049 -0.23323796E-03
8319.2	0.589981	0.010971	0.018596		8319.2	0.589185	0.012075	0.020494		8319.2	0.121454	0.048561	0.916713		8310.1072 -0.24067565E-03
8319.49	0.589219	0.010949	0.018583		8319.5	0.589687	0.012023	0.020389		8319.5	0.121187	0.046918	0.948944		8310.4049 -0.97093790E-04
8319.8	0.58935	0.011022	0.018702		8319.8	0.590322	0.012192	0.020653		8319.79	0.121143	0.045629	0.976421		8310.7072 -0.88248114E-04
8320.1	0.587773	0.011175	0.019013		8320.1	0.590371	0.012192	0.020651		8320.1	0.120717	0.04443	0.999526		8311.0050 0.64069592E-04
8320.4	0.586081	0.011302	0.019284		8320.4	0.589391	0.012218	0.02073		8320.4	0.120401	0.043482	1.01847		8311.3073 0.10994881E-03
8320.7	0.586951	0.011671	0.019884		8320.7	0.589205	0.01245	0.02113		8320.7	0.119853	0.042598	1.03446		8311.6051 0.28188822E-03
8321	0.587862	0.011887	0.02022		8321	0.589094	0.012647	0.021468		8320.99	0.119302	0.041829	1.04807		8311.9075 0.30959188E-03
8321.3	0.587558	0.012241	0.020835		8321.31	0.589425	0.01282	0.021749		8321.3	0.118256	0.040983	1.0597		8312.2054 0.28535053E-03
8321.6	0.587246	0.012545	0.021362		8321.6	0.590433	0.013011	0.022036		8321.6	0.116919	0.040113	1.06978		8312.5078 0.38002954E-03
8321.9	0.586513	0.012887	0.021972		8321.9	0.590951	0.013381	0.022643		8321.91	0.115122	0.038983	1.08287		8312.8057 0.29545450E-03
8322.2	0.586511	0.013186	0.022481		8322.2	0.591862	0.013679	0.023112		8322.2	0.113285	0.037717	1.0998		8313.1082 0.42503850E-03
8322.5	0.587112	0.013487	0.022972		8322.5	0.591151	0.014074	0.023808		8322.5	0.111151	0.036346	1.11781		8313.4061 0.45974477E-03
8322.8	0.587847	0.013694	0.023295		8322.8	0.590627	0.014385	0.024355		8322.8	0.109535	0.035072	1.13885		8313.7041 0.58013863E-03
8323.1	0.588967	0.014034	0.023828		8323.1	0.590661	0.01482	0.025091		8323.1	0.108748	0.034033	1.16171		8314.0066 0.67780713E-03
8323.4	0.589458	0.014479	0.024564		8323.4	0.59064	0.015392	0.026059		8323.39	0.108864	0.03323	1.18665		8314.3047 0.74137515E-03
8323.7	0.589487	0.014985	0.025421		8323.7	0.591307	0.015913	0.026912		8323.7	0.109611	0.032636	1.21153		8314.6072 0.86201521E-03
8324	0.588802	0.015692	0.02665		8324	0.592009	0.016605	0.028048		8324	0.111015	0.032283	1.23513		8314.9053 0.88519496E-03
8324.3	0.588224	0.016613	0.028242		8324.3	0.593174	0.017303	0.029171		8324.3	0.112179	0.031927	1.25664		8315.2079 0.10736318E-02
8324.6	0.589943	0.017631	0.029885		8324.61	0.592986	0.018164	0.030632		8324.6	0.113117	0.031545	1.277		8315.5060 0.11135503E-02
8324.9	0.593508	0.018758	0.031606		8324.9	0.5925	0.019453	0.032831		8324.9	0.113681	0.031099	1.29622		8315.8042 0.11849097E-02
8325.2	0.594549	0.020021	0.033675		8325.2	0.591992	0.020644	0.034873		8325.2	0.114104	0.03064	1.31479		8316.1069 0.12925457E-02
8325.51	0.595235	0.021358	0.035882		8325.5	0.592352	0.022003	0.037145		8325.5	0.114349	0.030169	1.33244		8316.4050 0.15545667E-02
8325.8	0.59554	0.022713	0.038139		8325.8	0.592759	0.02336	0.03941		8325.8	0.114024	0.029472	1.35298		8316.7078 0.14849656E-02
8326.1	0.595114	0.024331	0.040885		8326.1	0.59271	0.024945	0.042086		8326.1	0.113805	0.028727	1.37664		8317.0060 0.16316770E-02
8326.4	0.594681	0.026043	0.043792		8326.4	0.593107	0.026693	0.045006		8326.4	0.113434	0.027905	1.40243		8317.3042 0.18664874E-02
8326.7	0.594278	0.028065	0.047226		8326.7	0.593761	0.028654	0.048258		8326.7	0.112908	0.027014	1.4302		8317.6070 0.19512342E-02
8327	0.593974	0.030331	0.051065		8327	0.594114	0.030696	0.051667		8327	0.112423	0.026084	1.46096		8317.9053 0.19988174E-02
8327.3	0.595615	0.033005	0.055413		8327.3	0.5932	0.032804	0.0553		8327.3	0.111843	0.025092	1.49454		8318.2082 0.22371687E-02
8327.6	0.597704	0.035726	0.059772		8327.6	0.592558	0.035081	0.059203		8327.59	0.111116	0.024031	1.53123		8318.5065 0.23349905E-02
8327.91	0.599739	0.038864	0.064801		8327.91	0.59269	0.037518	0.063301		8327.9	0.110288	0.022925	1.57087		8318.8049 0.24803058E-02
8328.2	0.599962	0.041999	0.070003		8328.2	0.59223	0.040313	0.06807		8328.19	0.10924	0.021752	1.61384		8319.1078 0.25750077E-02
8328.5	0.599673	0.045373	0.075664		8328.5	0.593007	0.043306	0.073028		8328.5	0.108016	0.020599	1.65703		8319.4062 0.28136810E-02
8328.81	0.598697	0.048754	0.081433		8328.8	0.593438	0.046652	0.078613		8328.8	0.106691	0.019538	1.69757		8319.7046 0.28654941E-02
8329.1	0.595052	0.052158	0.087653		8329.1	0.593741	0.050271	0.084669		8329.09	0.105423	0.018422	1.74442		8320.0076 0.27996911E-02
8329.4	0.593243	0.055957	0.094324		8329.4	0.593163	0.054165	0.091316		8329.4	0.104109	0.017345	1.79216		8320.3061 0.29884752E-02
8329.7	0.593764	0.060043	0.101122		8329.7	0.592502	0.057947	0.0978		8329.7	0.102883	0.016325	1.84087		8320.6046 0.30895320E-02
8330	0.594779	0.064796	0.108941		8330	0.592088	0.062214	0.105075		8330	0.101849	0.015357	1.89189		8320.9076 0.32051598E-02
8330.3	0.595194	0.06941	0.116617		8330.3	0.591906	0.066489	0.112331		8330.3	0.100944	0.014472	1.94235		8321.2061 0.34405247E-02
8330.61	0.594413	0.073832	0.12421		8330.6	0.592444	0.070809	0.11952		8330.6	0.100009	0.013632	1.99281		8321.5047 0.36251646E-02
8330.89	0.593652	0.078759	0.132668		8330.9	0.592501	0.074769	0.126192		8330.9	0.099169	0.012875	2.04152		8321.8078 0.37111336E-02
8331.2	0.592856	0.0836	0.141012		8331.2	0.593367	0.078759	0.132732		8331.2	0.098316	0.012189	2.08769		8322.1064 0.40792631E-02
8331.5	0.592763	0.088456	0.149227		8331.5	0.593087	0.082062	0.138365		8331.5	0.097669	0.011589	2.13149		8322.4050 0.41655567E-02
8331.8	0.59315	0.093176	0.157086		8331.8	0.592213	0.085192	0.143854		8331.8	0.097124	0.011054	2.17316		8322.7082 0.44264496E-02
8332.1	0.593776	0.098073	0.165169		8332.1	0.591586	0.088007	0.148765		8332.1	0.096916	0.010645	2.20871		8323.0069 0.45020039E-02
8332.41	0.593907	0.102478	0.172549		8332.4	0.591404	0.090518	0.153057		8332.4	0.096578	0.010293	2.23887		8323.3056 0.46644340E-02
8332.7	0.594416	0.106253	0.178751		8332.7	0.591329	0.092376	0.156218		8332.7	0.096443	0.010053	2.26107		8323.6043 0.49502801E-02
8333	0.593441	0.109745	0.18493		8333	0.591943	0.093957	0.158727		8333	0.096036	0.009846	2.27767		8323.9076 0.51401917E-02
8333.29	0.593085	0.112537	0.189749		8333.31	0.592553	0.095021	0.160359		8333.3	0.095843	0.009693	2.29129		8324.2063 0.53850002E-02
8333.6	0.596298	0.114682	0.192324		8333.6	0.592656	0.095901	0.161816		8333.6	0.095582	0.009573	2.30104		8324.5051 0.56721885E-02
8333.91	0.59615	0.116044	0.194656		8333.9	0.591733	0.096103	0.16241		8333.9	0.095386	0.009488	2.30786		8324.8084 0.60379938E-02
8334.21	0.596363	0.116534	0.195408		8334.2	0.590904	0.095776	0.162084		8334.2	0.095158	0.009442	2.31038		8325.1073 0.62069909E-02
8334.5	0.596859	0.116345	0.194929		8334.5	0.59037	0.09533	0.161475		8334.5	0.094862	0.009409	2.31079		8325.4061 0.64203101E-02
8334.8	0.597381	0.115374	0.193133		8334.8	0.590391	0.094742	0.160473		8334.8	0.094568	0.009402	2.30836		8325.7050 0.66525067E-02
8335.1	0.597295	0.113799	0.190524		8335.1	0.590632	0.094229	0.159539		8335.1	0.09437	0.009421	2.30426		8326.0084 0.69256265E-02
8335.4	0.59641	0.111959	0.187722		8335.4	0.590876	0.093446	0.158149		8335.4	0.094347	0.009478	2.29797		8326.3073 0.72317892E-02
8335.71	0.595559	0.110085	0.184843		8335.71	0.591533	0.092322	0.156072		8335.7	0.094215	0.00953	2.29112		8326.6063 0.73949285E-02
8336	0.595445	0.107757	0.180969		8336	0.591521	0.091386	0.154493		8336	0.094325	0.009629	2.28193		8326.9052 0.76793341E-02
8336.3	0.595227	0.105501	0.177245		8336.3	0.591304	0.089977	0.152167		8336.3	0.094058	0.009675	2.27433		8327.2042 0.80503930E-02
8336.6	0.595372	0.103835	0.174403		8336.59	0.590728	0.088836	0.150384		8336.6	0.094047	0.009751	2.26643		8327.5078 0.82875208E-02
8336.9	0.59582	0.101922	0.171062		8336.9	0.590143	0.08744	0.148168		8336.9	0.09386	0.009804	2.25897		8327.8068 0.87291910E-02
8337.21	0.59615	0.100275	0.168204		8337.2	0.589565	0.086025	0.145912		8337.2	0.093753	0.009844	2.25384		8328.1058 0.91124507E-02
8337.5	0.596492	0.098773	0.16559		8337.5	0.589967	0.084565	0.143338		8337.5	0.093501	0.009881	2.24739		8328.4049 0.93861057E-02
8337.8	0.595731	0.096882	0.162627		8337.8	0.589739	0.083309	0.141264		8337.81	0.093292	0.009898	2.24344		8328.7040 0.99061310E-02
8338.1	0.590537	0.094686	0.160339		8338.1	0.591366	0.081923	0.138532		8338.1	0.09331	0.009909	2.24248		8329.0076 0.10318920E-01
8338.41	0.59044	0.093091	0.157664		8338.4	0.591126	0.080672	0.136472		8338.4	0.093036	0.009866	2.24394		8329.3068 0.10744806E-01
8338.7	0.589863	0.091453	0.155041		8338.7	0.590666	0.079233	0.134142		8338.7	0.093122	0.009838	2.24763		8329.6059 0.11238058E-01
8339	0.590315	0.090022	0.152498		8339	0.589844	0.077928	0.132116		8339	0.093067	0.009768	2.25418		8329.9051 0.11750285E-01
8339.3	0.590493	0.088651	0.150131		8339.3	0.589684	0.076712	0.130089		8339.3	0.092859	0.009648	2.26435		8330.2043 0.12249727E-01
8339.6	0.591676	0.087267	0.147492		8339.6	0.589126	0.075469	0.128103		8339.6	0.092892	0.009537	2.27631		8330.5081 0.12858090E-01
8339.9	0.591566	0.085846	0.145117		8339.9	0.589281	0.074264	0.126025		8339.9	0.092627	0.009367	2.29138		8330.8073 0.13481030E-01
8340.2	0.591164	0.084137	0.142324		8340.2	0.590671	0.073424	0.124306		8340.2	0.092305	0.009186	2.30742		8331.1066 0.14161610E-01
8340.5	0.590426	0.082589	0.139881		8340.5	0.591225	0.072578	0.122758		8340.5	0.092073	0.009008	2.32452		8331.4059 0.14856285E-01
8340.79	0.590552	0.081133	0.137385		8340.8	0.591831	0.071508	0.120826		8340.8	0.091708	0.008815	2.34212		8331.7052 0.15651275E-01
8341.1	0.589572	0.079739	0.13525		8341.1	0.591016	0.070653	0.119544		8341.1	0.091335	0.008631	2.35922		8332.0046 0.16537901E-01
8341.4	0.589155	0.078629	0.133461		8341.4	0.59087	0.069721	0.117998		8341.4	0.091298	0.00852	2.37176		8332.3039 0.17572960E-01
8341.7	0.588743	0.077278	0.131259		8341.7	0.59197	0.069262	0.117003		8341.69	0.091241	0.008415	2.38343		8332.6079 0.18634230E-01
8342	0.589726	0.076294	0.129373		8342	0.593407	0.068462	0.11537		8342	0.091213	0.008351	2.39082		8332.9073 0.20029423E-01
8342.3	0.589206	0.075231	0.127681		8342.3	0.594736	0.068174	0.114629		8342.3	0.091261	0.008304	2.39696		8333.2067 0.21728382E-01
8342.6	0.59341	0.07481	0.126067		8342.6	0.595482	0.067598	0.113517		8342.6	0.091173	0.008288	2.39794		8333.5061 0.23868958E-01
8342.9	0.592709	0.073989	0.124831		8342.91	0.595759	0.067127	0.112675		8342.9	0.091226	0.008306	2.39633		8333.8056 0.26931405E-01
8343.2	0.591065	0.073079	0.123639		8343.2	0.595859	0.066787	0.112085		8343.2	0.091292	0.008345	2.39241		8334.1051 0.30819969E-01
8343.5	0.590984	0.072542	0.122748		8343.5	0.594702	0.066185	0.11129		8343.5	0.091452	0.008409	2.38647		8334.4046 0.36045763E-01
8343.8	0.591225	0.072049	0.121864		8343.8	0.594121	0.065565	0.110356		8343.8	0.09173	0.008501	2.3787		8334.7042 0.41494830E-01
8344.1	0.592325	0.071443	0.120615		8344.1	0.593679	0.065162	0.109759		8344.1	0.091963	0.008585	2.37136		8335.0083 0.46004606E-01
8344.4	0.592424	0.0711	0.120016		8344.4	0.594085	0.064818	0.109105		8344.4	0.092333	0.008705	2.36151		8335.3078 0.47889475E-01
8344.71	0.5926	0.070541	0.119037		8344.7	0.594408	0.064646	0.108757		8344.7	0.092839	0.00883	2.35276		8335.6074 0.47216731E-01
8345.01	0.592204	0.07024	0.118608		8345	0.594865	0.064288	0.108072		8345	0.093287	0.008945	2.34459		8335.9071 0.45132344E-01
8345.3	0.591666	0.069896	0.118133		8345.3	0.595424	0.064053	0.107575		8345.3	0.093786	0.009057	2.33747		8336.2067 0.43047728E-01
8345.6	0.591507	0.069571	0.117616		8345.59	0.595595	0.063655	0.106876		8345.6	0.094254	0.009175	2.32952		8336.5064 0.42154304E-01
8345.9	0.591217	0.069271	0.117167		8345.9	0.595524	0.063268	0.106239		8345.9	0.094785	0.009287	2.323		8336.8061 0.42853647E-01
8346.21	0.590887	0.06894	0.116672		8346.2	0.594781	0.062917	0.105782		8346.2	0.095122	0.009375	2.31714		8337.1058 0.44599573E-01
8346.5	0.591728	0.068856	0.116365		8346.5	0.594212	0.062511	0.105199		8346.5	0.095377	0.009461	2.31067		8337.4055 0.47661941E-01
8346.8	0.591894	0.068591	0.115884		8346.8	0.594095	0.062302	0.104869		8346.8	0.095519	0.009535	2.30441		8337.7053 0.51873132E-01
8347.1	0.592308	0.068717	0.116016		8347.1	0.594256	0.061903	0.104168		8347.1	0.095899	0.009641	2.29729		8338.0051 0.57659991E-01
8347.4	0.589394	0.068433	0.116107		8347.4	0.594859	0.061758	0.103819		8347.4	0.0961	0.009729	2.29025		8338.3049 0.65062698E-01
8347.7	0.588441	0.068129	0.115779		8347.7	0.595177	0.061399	0.10316		8347.7	0.096531	0.00984	2.28339		8338.6047 0.73968513E-01
8348	0.58827	0.067873	0.115378		8348	0.595409	0.061259	0.102885		8348	0.096824	0.009937	2.27668		8338.9046 0.83484694E-01
8348.3	0.587473	0.067824	0.115451		8348.3	0.595046	0.061005	0.102521		8348.3	0.097343	0.010073	2.26843		8339.2044 0.92913798E-01
8348.61	0.588192	0.067928	0.115487		8348.6	0.594464	0.060689	0.10209		8348.59	0.097518	0.010161	2.26145		8339.5043 0.10218886
8348.9	0.588599	0.06779	0.115172		8348.9	0.59355	0.060519	0.10196		8348.9	0.097845	0.010289	2.25226		8339.8043 0.11135952
8349.2	0.589937	0.067819	0.11496		8349.2	0.59419	0.060288	0.101462		8349.2	0.098022	0.010396	2.24373		8340.1042 0.12090084
8349.5	0.589595	0.067478	0.114448		8349.5	0.59419	0.059979	0.100942		8349.5	0.097967	0.010471	2.23602		8340.4042 0.13194313
8349.81	0.588977	0.067296	0.11426		8349.8	0.594948	0.059638	0.100241		8349.8	0.098112	0.010575	2.22765		8340.7041 0.14543397
8350.1	0.588122	0.067075	0.114049		8350.1	0.595623	0.059454	0.099819		8350.1	0.098146	0.010661	2.21985		8341.0041 0.16217368
8350.41	0.588156	0.06684	0.113644		8350.4	0.595677	0.059416	0.099745		8350.4	0.09832	0.010744	2.21391		8341.3042 0.18270740
8350.71	0.587832	0.066549	0.113211		8350.7	0.595918	0.059156	0.099268		8350.7	0.098481	0.010816	2.20886		8341.6042 0.20824624
8351	0.588151	0.066153	0.112476		8351	0.595	0.058909	0.099007		8351	0.098878	0.010914	2.20383		8341.9043 0.23851471
8351.3	0.58855	0.06598	0.112106		8351.3	0.594026	0.058735	0.098877		8351.3	0.098953	0.010961	2.20026		8342.2044 0.27296787
8351.6	0.592559	0.065903	0.111217		8351.6	0.59378	0.058298	0.098182		8351.61	0.099227	0.011035	2.19633		8342.5045 0.30987863
8351.9	0.59449	0.06568	0.110481		8351.91	0.594053	0.058101	0.097804		8351.9	0.099421	0.011078	2.19442		8342.8046 0.34688339
8352.19	0.593862	0.0654	0.110127		8352.2	0.594949	0.057987	0.097465		8352.2	0.099508	0.011121	2.1914		8343.1048 0.38235688
8352.5	0.594122	0.065086	0.109551		8352.5	0.595503	0.057959	0.097327		8352.5	0.099441	0.011147	2.18836		8343.4050 0.41572635
8352.8	0.592935	0.064576	0.108909		8352.8	0.595263	0.057612	0.096784		8352.8	0.099559	0.011183	2.18635		8343.7052 0.44718891
8353.1	0.592819	0.064128	0.108175		8353.1	0.59549	0.05741	0.096408		8353.1	0.099548	0.011194	2.18528		8344.0054 0.47793504
8353.4	0.592994	0.063886	0.107735		8353.4	0.593816	0.057047	0.096069		8353.4	0.099716	0.011228	2.18394		8344.3057 0.50845229
8353.7	0.593493	0.063562	0.107098		8353.7	0.593351	0.056777	0.095688		8353.7	0.099927	0.011274	2.1819		8344.6059 0.53869623
8354	0.593832	0.063003	0.106097		8354	0.593623	0.056727	0.095561		8354	0.100253	0.011316	2.18152		8344.9062 0.56837362
8354.3	0.594005	0.062899	0.105891		8354.3	0.59446	0.056563	0.095151		8354.3	0.100496	0.011353	2.18067		8345.2066 0.59862591
8354.6	0.593904	0.062663	0.105511		8354.6	0.594784	0.056402	0.094828		8354.6	0.100564	0.011351	2.1815		8345.5069 0.63086540
8354.9	0.593072	0.062158	0.104807		8354.9	0.595123	0.056062	0.094203		8354.9	0.100639	0.01136	2.18141		8345.8073 0.66666242
8355.2	0.592764	0.061645	0.103995		8355.2	0.595133	0.05584	0.093828		8355.2	0.10076	0.011354	2.1832		8346.1076 0.70808572
8355.5	0.592515	0.061295	0.10345		8355.5	0.594537	0.055575	0.093475		8355.5	0.100824	0.011351	2.18409		8346.4080 0.75733441
8355.8	0.592456	0.061015	0.102987		8355.8	0.593949	0.055193	0.092925		8355.8	0.10088	0.011317	2.18761		8346.7039 0.81226342
8356.1	0.593482	0.060702	0.102281		8356.1	0.593543	0.054975	0.092622		8356.1	0.100804	0.011265	2.19146		8347.0044 0.87245892
8356.4	0.591771	0.060376	0.102026		8356.4	0.593242	0.054765	0.092315		8356.4	0.100912	0.011233	2.19541		8347.3048 0.93263158
8356.7	0.594248	0.060242	0.101375		8356.7	0.594154	0.054558	0.091824		8356.7	0.10087	0.011174	2.20025		8347.6053 0.98779752
8357	0.595213	0.060051	0.10089		8357	0.594252	0.054298	0.091373		8357	0.10117	0.011135	2.2067		8347.9059 1.0354954
8357.3	0.593922	0.059588	0.10033		8357.3	0.594866	0.054277	0.091243		8357.3	0.101309	0.011082	2.21286		8348.2064 1.0756080
8357.6	0.593803	0.059386	0.100011		8357.6	0.595056	0.054091	0.090901		8357.6	0.101488	0.011026	2.21972		8348.5070 1.1094139
8357.9	0.59316	0.059101	0.099637		8357.9	0.594333	0.053924	0.090731		8357.9	0.101512	0.010948	2.22699		8348.8075 1.1400332
8358.2	0.593017	0.058818	0.099185		8358.2	0.593249	0.053472	0.090134		8358.2	0.101635	0.010869	2.23551		8349.1081 1.1690498
8358.5	0.593552	0.058569	0.098676		8358.5	0.59291	0.053426	0.090109		8358.5	0.101857	0.010801	2.24393		8349.4042 1.1966940
8358.8	0.594123	0.058384	0.098269		8358.81	0.593041	0.053333	0.089932		8358.8	0.101739	0.010687	2.25334		8349.7049 1.2251853
8359.1	0.594703	0.058338	0.098096		8359.1	0.593681	0.05334	0.089846		8359.09	0.10169	0.010598	2.26125		8350.0055 1.2552721
8359.4	0.594002	0.058099	0.09781		8359.41	0.594412	0.053098	0.089329		8359.39	0.101781	0.010505	2.27094		8350.3062 1.2868784
8359.7	0.593249	0.057887	0.097577		8359.71	0.594452	0.053156	0.08942		8359.7	0.101885	0.01042	2.28013		8350.6070 1.3205124
8360	0.59322	0.057672	0.097218		8360	0.594478	0.053172	0.089443		8360	0.102152	0.010348	2.28964		8350.9077 1.3557693
8360.3	0.592957	0.057708	0.097322		8360.3	0.593723	0.052997	0.089262		8360.3	0.1024	0.010276	2.29906		8351.2085 1.3912825
8360.6	0.594193	0.057725	0.097148		8360.6	0.59269	0.052724	0.088956		8360.61	0.102532	0.010196	2.30814		8351.5047 1.4222355
8360.9	0.598175	0.05808	0.097095		8360.9	0.592486	0.052713	0.088968		8360.9	0.10261	0.010114	2.317		8351.8055 1.4466322
8361.2	0.599149	0.058148	0.09705		8361.2	0.592876	0.052715	0.088913		8361.21	0.102738	0.010038	2.32584		8352.1063 1.4604359
8361.5	0.599529	0.058265	0.097185		8361.5	0.593177	0.052729	0.088893		8361.5	0.102804	0.009948	2.33544		8352.4072 1.4628216
8361.8	0.598889	0.058378	0.097477		8361.8	0.594031	0.053108	0.089403		8361.8	0.102926	0.009865	2.34498		8352.7080 1.4548138
8362.1	0.598451	0.058359	0.097517		8362.1	0.59416	0.053262	0.089642		8362.1	0.102914	0.009767	2.35489		8353.0044 1.4392781
8362.41	0.597729	0.058428	0.09775		8362.4	0.594182	0.053098	0.089364		8362.4	0.103017	0.009675	2.36531		8353.3053 1.4182389
8362.7	0.597705	0.058603	0.098047		8362.7	0.59321	0.053363	0.089956		8362.71	0.103051	0.009581	2.37543		8353.6062 1.3929066
8363.01	0.597878	0.058832	0.098402		8363.01	0.592392	0.053431	0.090195		8363	0.103175	0.009489	2.3863		8353.9072 1.3649353
8364	0.598114	0.059752	0.099901		8364	0.592384	0.05421	0.091511		8363.99	0.103804	0.009227	2.42035		8354.2082 1.3350184
8365	0.599307	0.061063	0.101889		8365	0.592415	0.055294	0.093336		8364.99	0.104091	0.00901	2.44694		8354.5046 1.3045000
8366	0.598873	0.062462	0.1043		8366	0.592966	0.056348	0.095027		8365.99	0.104112	0.008854	2.46458		8354.8057 1.2728776
8366.99	0.598176	0.063871	0.106776		8367	0.593143	0.057779	0.097412		8367	0.104327	0.008835	2.46885		8355.1067 1.2417184
8368	0.597681	0.065719	0.109956		8368	0.593204	0.059443	0.100207		8368	0.104152	0.008892	2.46071		8355.4078 1.2120714
8369	0.597417	0.067194	0.112475		8369	0.593135	0.061143	0.103085		8369	0.103854	0.009023	2.44325		8355.7043 1.1852410
8370	0.593685	0.068441	0.115282		8370	0.592663	0.062474	0.105412		8370	0.103425	0.009232	2.41618		8356.0054 1.1601787
8371	0.593884	0.070112	0.118056		8371	0.59204	0.063693	0.107583		8371	0.102948	0.009506	2.38233		8356.3066 1.1380370
8372	0.594803	0.071401	0.120042		8372	0.591865	0.065185	0.110135		8371.99	0.102766	0.009849	2.34512		8356.6077 1.1192173
8373	0.595205	0.072821	0.122346		8373	0.591922	0.066434	0.112235		8373	0.102719	0.01018	2.31155		8356.9044 1.1039613
8373.99	0.594704	0.073859	0.124194		8374	0.59242	0.067436	0.113831		8374	0.102896	0.010522	2.28027		8357.2056 1.0899310
8375	0.593607	0.074782	0.12598		8374.99	0.592937	0.068345	0.115265		8375	0.103048	0.010871	2.24909		8357.5068 1.0778364
8375.99	0.593951	0.075884	0.127762		8376	0.59317	0.068911	0.116174		8376	0.103318	0.011195	2.22238		8357.8081 1.0663406
8377	0.593275	0.076565	0.129054		8377	0.59205	0.069042	0.116615		8376.99	0.103398	0.011471	2.19872		8358.1048 1.0548258
8377.99	0.593915	0.077295	0.130145		8377.98	0.591542	0.069431	0.117373		8378	0.103361	0.011692	2.17932		8358.4061 1.0420487
8379	0.594003	0.077948	0.131225		8379	0.590818	0.069822	0.118178		8379	0.103278	0.011838	2.16613		8358.7074 1.0277001
8380	0.594813	0.078303	0.131644		8380	0.590692	0.069886	0.118312		8380	0.103251	0.011918	2.15914		8359.0042 1.0119397
8381	0.594678	0.078464	0.131943		8381	0.590857	0.069667	0.117909		8381	0.103286	0.011952	2.15663		8359.3055 0.99380054
8382	0.593966	0.078602	0.132334		8382.01	0.59149	0.069631	0.117721		8382	0.103284	0.011955	2.15635		8359.6069 0.97439672
8383	0.593807	0.078551	0.132284		8383	0.591882	0.069776	0.117888		8383	0.103523	0.011969	2.15748		8359.9083 0.95427069
8384	0.596396	0.078547	0.131703		8383.99	0.592006	0.069493	0.117386		8384	0.103701	0.012016	2.15527		8360.2052 0.93430655
8385	0.59758	0.078683	0.131669		8385	0.59148	0.069312	0.117184		8385	0.103872	0.012093	2.15053		8360.5066 0.91426226
8385.99	0.5977	0.078499	0.131336		8386	0.590721	0.069043	0.116879		8386	0.104175	0.012202	2.14446		8360.8081 0.89522952
8387	0.597875	0.078292	0.130951		8387	0.59243	0.069148	0.116719		8386.99	0.104461	0.012293	2.13975		8361.1050 0.87797889
8388.01	0.598537	0.078301	0.13082		8387.98	0.594135	0.069259	0.116571		8387.98	0.104373	0.012324	2.13639		8361.4066 0.86219730
8389	0.597934	0.077852	0.130202		8389	0.59586	0.069148	0.116048		8389	0.104384	0.012331	2.13598		8361.7081 0.84814515
8390	0.597691	0.077611	0.129851		8390	0.597038	0.069018	0.115601		8389.98	0.104129	0.012265	2.13885		8362.0051 0.83666216
8391	0.59691	0.077497	0.12983		8391	0.596937	0.068753	0.115177		8391.01	0.104219	0.012193	2.14566		8362.3067 0.82689009
8391.99	0.596606	0.077179	0.129364		8392	0.596681	0.068558	0.114898		8392	0.104165	0.012082	2.15423		8362.6083 0.81956438
8393	0.596989	0.076949	0.128895		8393	0.595763	0.06832	0.114677		8393	0.104182	0.011957	2.16481		8362.9053 0.81459544
8394	0.597097	0.076737	0.128516		8394	0.595451	0.068073	0.114321		8393.99	0.104291	0.011887	2.17173		8363.2070 0.81171668
8395	0.597985	0.076508	0.127944		8394.99	0.595444	0.06785	0.113949		8395	0.104407	0.011828	2.17785		8363.5041 0.81124233
8396	0.597617	0.07616	0.127439		8396	0.596191	0.067588	0.113367		8396	0.104407	0.011766	2.18307		8363.8058 0.81308601
8397	0.597074	0.075604	0.126624		8397	0.59627	0.067286	0.112846		8396.99	0.104388	0.011683	2.18999		8364.1075 0.81709494
8397.99	0.59485	0.075015	0.126108		8398	0.596578	0.067177	0.112603		8398	0.104268	0.011577	2.19792		8364.4047 0.82304753
8399	0.591949	0.074203	0.125354		8399	0.596582	0.066889	0.112121		8399	0.104122	0.011434	2.20893		8364.7065 0.83143957
8400	0.592408	0.074104	0.12509		8400	0.596201	0.066703	0.11188		8399.99	0.104135	0.01129	2.22176		8365.0082 0.84156686
8401	0.592905	0.073834	0.124529		8401	0.595594	0.066305	0.111326		8401	0.104256	0.011147	2.2357		8365.3055 0.85312155
8402	0.592973	0.073543	0.124023		8402	0.594778	0.066042	0.111037		8402	0.104282	0.010994	2.24974		8365.6073 0.86631314
8402.99	0.591099	0.073057	0.123595		8403	0.593076	0.065511	0.110459		8402.98	0.10408	0.010835	2.26242		8365.9046 0.88000733
8404	0.589582	0.072697	0.123303		8404	0.592776	0.065133	0.109878		8403.99	0.104101	0.010709	2.27428		8366.2065 0.89370773
8405	0.589598	0.072165	0.122397		8404.99	0.593352	0.065046	0.109625		8404.99	0.104276	0.010597	2.28643		8366.5084 0.90716676
8406	0.590545	0.072211	0.122279		8406	0.595724	0.064965	0.109052		8406	0.104724	0.010508	2.29917		8366.8057 0.91917532
8407.01	0.592925	0.072188	0.121748		8407	0.59727	0.064912	0.108682		8407	0.105017	0.010399	2.31243		8367.1077 0.92944858
8407.99	0.593795	0.072064	0.121362		8408	0.596411	0.064615	0.108339		8408	0.105172	0.010265	2.32681		8367.4050 0.93787806
8408.99	0.594957	0.071937	0.120912		8409	0.595676	0.064215	0.107802		8409	0.105379	0.010129	2.34219		8367.7070 0.94431924
8410	0.594644	0.071718	0.120606		8410	0.595461	0.063831	0.107196		8410	0.105419	0.009985	2.35682		8368.0045 0.94855871
8411	0.593844	0.071523	0.120441		8410.98	0.596031	0.063705	0.106882		8410.99	0.105705	0.009846	2.37358		8368.3065 0.95074226
8412	0.597648	0.071521	0.11967		8411.99	0.596641	0.063637	0.106659		8412	0.10611	0.00973	2.38929		8368.6040 0.95101192
8413	0.597514	0.071361	0.119431		8413	0.596531	0.063361	0.106216		8413	0.106475	0.009617	2.40437		8368.9061 0.94971811
8414	0.596912	0.071118	0.119143		8414	0.596767	0.063286	0.106048		8414	0.106744	0.009538	2.4152		8369.2082 0.94702923
8415	0.596738	0.071034	0.119038		8414.99	0.595707	0.06338	0.106395		8415	0.107134	0.009489	2.42397		8369.5057 0.94272641
8416	0.598108	0.070948	0.11862		8415.99	0.595079	0.063242	0.106274		8416	0.107258	0.009466	2.42752		8369.8078 0.93786737
8416.99	0.5992	0.070967	0.118436		8417	0.595378	0.063175	0.10611		8416.99	0.107373	0.009503	2.42474		8370.1054 0.93212436
8418	0.59859	0.070714	0.118135		8418	0.595994	0.063115	0.105898		8418	0.107595	0.009592	2.41745		8370.4076 0.92594727
8419	0.598264	0.070729	0.118224		8419	0.597364	0.063495	0.106292		8418.99	0.107853	0.009721	2.40651		8370.7053 0.91965045
8420	0.597423	0.070547	0.118086		8420	0.597142	0.063479	0.106305		8420	0.107983	0.009886	2.3909		8371.0075 0.91323556
8421	0.596723	0.070337	0.117873		8421	0.596619	0.063479	0.106398		8421	0.108428	0.010084	2.37511		8371.3052 0.90756775
8422	0.596539	0.07023	0.11773		8421.99	0.596342	0.063897	0.107149		8422	0.108774	0.010287	2.35836		8371.6074 0.90218463
8423	0.596728	0.070262	0.117745		8423	0.595364	0.063953	0.107418		8423	0.10887	0.010503	2.33851		8371.9052 0.89759790
8424	0.598106	0.070504	0.117879		8424	0.595261	0.063871	0.1073		8424	0.109397	0.010778	2.31745		8372.2075 0.89358846
8425	0.598405	0.070696	0.118141		8425	0.596442	0.064307	0.107819		8425	0.109655	0.011051	2.2948		8372.5052 0.88989511
8426	0.593784	0.070139	0.118122		8426	0.596975	0.064461	0.10798		8426	0.109816	0.011327	2.27162		8372.8076 0.88656526
8427	0.59482	0.070467	0.118468		8427	0.597611	0.064648	0.108177		8427	0.109993	0.011599	2.24954		8373.1054 0.88374404
8428	0.596119	0.070791	0.118753		8428	0.597736	0.064822	0.108447		8428	0.110055	0.011847	2.22894		8373.4078 0.88107587
8429	0.596421	0.070896	0.118869		8429	0.597481	0.06515	0.109042		8429	0.11015	0.012071	2.21101		8373.7057 0.87825251
8430	0.597312	0.071296	0.119362		8430	0.59677	0.065221	0.109291		8429.99	0.110282	0.012272	2.19575		8374.0081 0.87547161
8431	0.598001	0.071468	0.119512		8431	0.596706	0.065377	0.109563		8430.99	0.110408	0.012438	2.1834		8374.3060 0.87242109
8432	0.598126	0.071672	0.119828		8432	0.596199	0.065414	0.109719		8432	0.110713	0.012627	2.17114		8374.6040 0.86906268
8433	0.597605	0.071833	0.120201		8433	0.596248	0.065698	0.110186		8432.99	0.111063	0.012832	2.15817		8374.9065 0.86565857
8433.99	0.597014	0.072146	0.120845		8433.99	0.598168	0.065658	0.109766		8434	0.11129	0.013062	2.14242		8375.2044 0.86202058
8434.99	0.59628	0.07229	0.121235		8434.98	0.598374	0.066135	0.110525		8435	0.111265	0.01329	2.12489		8375.5070 0.85804405
8436	0.596368	0.072482	0.121539		8436	0.598321	0.066342	0.11088		8436	0.111393	0.013572	2.10503		8375.8050 0.85403618
8437	0.596965	0.072538	0.121512		8437	0.597001	0.066376	0.111182		8437	0.111372	0.013845	2.08494		8376.1076 0.85016430
8437.99	0.597091	0.073005	0.122267		8438	0.59642	0.066156	0.110922		8438	0.111476	0.014156	2.06367		8376.4057 0.84633279
8439	0.597445	0.07332	0.122722		8438.98	0.596581	0.066494	0.111458		8439	0.111743	0.014481	2.04334		8376.7083 0.84244115
8440	0.601303	0.074005	0.123075		8440	0.597474	0.066706	0.111646		8440	0.112032	0.014772	2.02604		8377.0064 0.83899267
8441	0.600126	0.074005	0.123316		8441	0.597999	0.066744	0.111613		8440.99	0.112098	0.014991	2.0119		8377.3045 0.83567683
8441.99	0.599953	0.074244	0.123749		8442	0.598334	0.067164	0.112251		8442	0.112504	0.015207	2.00123		8377.6073 0.83268989
8443	0.599408	0.074355	0.124047		8443	0.598014	0.067147	0.112283		8442.99	0.112745	0.015341	1.99457		8377.7082 0.83187701
8444	0.599383	0.074359	0.124059		8444	0.597491	0.067179	0.112436		8444	0.11286	0.015399	1.99184		8378.8643 0.82564007
8445	0.599914	0.074567	0.124296		8445	0.596694	0.06705	0.112368		8445	0.113021	0.015404	1.99297		8380.1263 0.82779068
8446	0.600181	0.074804	0.124636		8446	0.596242	0.067293	0.112862		8446	0.113123	0.015369	1.99615		8381.4070 0.83971285
8447	0.600596	0.074967	0.12482		8447	0.598235	0.06768	0.113133		8447	0.11331	0.015288	2.00306		8382.7065 0.85840825
8448	0.600366	0.075059	0.125022		8448	0.598047	0.067745	0.113278		8448	0.113347	0.015146	2.01273		8384.0248 0.87899559
8449	0.600024	0.075227	0.125373		8449	0.599577	0.067881	0.113215		8449	0.113397	0.014977	2.02439		8385.3573 0.89717563
8450	0.600163	0.075479	0.125764		8450	0.599534	0.067955	0.113346		8450	0.113749	0.01484	2.0367		8386.7133 0.91060576
8451	0.600635	0.075481	0.125669		8450.99	0.59907	0.06805	0.113593		8451	0.114047	0.014681	2.05004		8388.0881 0.92051097
8452	0.602122	0.075667	0.125667		8452	0.59807	0.068046	0.113776		8452.01	0.114283	0.014511	2.0638		8389.4817 0.93448152
8452.98	0.602731	0.075906	0.125936		8453	0.597836	0.068016	0.11377		8453	0.114622	0.014335	2.07896		8390.8943 0.96044618
8454.01	0.602202	0.076079	0.126334		8454	0.598097	0.068181	0.113997		8454	0.114677	0.014157	2.09192		8392.3257 0.99680378
8455	0.597766	0.075725	0.12668		8455.01	0.598602	0.068336	0.114159		8455	0.114703	0.013977	2.10493		8393.7761 1.0347603
8456	0.596257	0.075606	0.126801		8456	0.598876	0.068308	0.11406		8456	0.114942	0.013846	2.11646		8395.2454 1.0674383
8457	0.595332	0.075583	0.126959		8456.99	0.598666	0.068373	0.114209		8457	0.114897	0.013739	2.12382		8396.7383 1.0910719
8458	0.595697	0.075629	0.126958		8458	0.59871	0.068449	0.114327		8458	0.114868	0.013641	2.13069		8398.2455 1.1071728
8459	0.595685	0.075734	0.127138		8459	0.59738	0.068497	0.114662		8459	0.114983	0.013622	2.13308		8399.7718 1.1199379
8460	0.596117	0.075903	0.127329		8460	0.59553	0.068215	0.114545		8459.99	0.115134	0.013644	2.1328		8401.3171 1.1297371
8461	0.597671	0.076085	0.127303		8461	0.596249	0.068557	0.114981		8461	0.115349	0.01371	2.12987		8402.8814 1.1313841
8462	0.597969	0.076059	0.127196		8462	0.595076	0.068486	0.115088		8461.99	0.115618	0.013798	2.1258		8404.4648 1.1185473
8463	0.597077	0.076267	0.127734		8463	0.596094	0.068477	0.114876		8462.99	0.115774	0.013893	2.12026		8406.0673 1.0951765
8464	0.596095	0.076108	0.127677		8464	0.596454	0.0686	0.115013		8464	0.115678	0.01396	2.11463		8407.6889 1.0694509
8464.98	0.595754	0.076025	0.127612		8465	0.596834	0.068809	0.115291		8465.01	0.115762	0.014025	2.11071		8409.3297 1.0439835
8465.99	0.595028	0.076146	0.127971		8465.98	0.597035	0.068727	0.115114		8466	0.115533	0.01401	2.10979		8410.9896 1.0170391
8466.98	0.595412	0.076197	0.127974		8467	0.597046	0.068834	0.115292		8467	0.11552	0.013982	2.11165		8412.6687 0.99290592
8468.01	0.601098	0.076826	0.127809		8467.99	0.597615	0.068719	0.114989		8468	0.11545	0.013884	2.11809		8414.3670 0.97203265
8469	0.60107	0.076655	0.127532		8469	0.59821	0.068987	0.115322		8469	0.11562	0.013743	2.12981		8416.0845 0.95220766
8469.99	0.60069	0.076654	0.12761		8470	0.599393	0.069095	0.115276		8470.01	0.115733	0.013532	2.14626		8417.8166 0.93295866
8470.99	0.600076	0.076607	0.127663		8470.99	0.601061	0.069134	0.115019		8471	0.11599	0.013277	2.16747		8419.5727 0.91829566
8472	0.599247	0.07666	0.127927		8472	0.601613	0.068811	0.114377		8472	0.11617	0.012966	2.19269		8421.3480 0.90934385
8472.99	0.598984	0.076574	0.127839		8473	0.600409	0.069087	0.115066		8472.99	0.11621	0.012648	2.21789		8423.1381 0.90559945
8473.99	0.59989	0.076598	0.127688		8473.99	0.5993	0.069563	0.116073		8474	0.116349	0.01233	2.24453		8424.9521 0.90807176
8475	0.600163	0.076596	0.127625		8475	0.603508	0.069469	0.11511		8474.99	0.116414	0.012048	2.26826		8426.7808 0.91714333
8476	0.600631	0.076621	0.127568		8476	0.602829	0.069072	0.114579		8476	0.116298	0.011784	2.28945		8428.6336 0.93152428
8477	0.600377	0.076655	0.127679		8477	0.605245	0.069263	0.114438		8476.99	0.11649	0.011601	2.30673		8430.5012 0.94702234
8477.99	0.600144	0.076554	0.127559		8478	0.604622	0.069263	0.114555		8478	0.11645	0.011443	2.32007		8432.3882 0.95969624
8479	0.598809	0.076319	0.127452		8479	0.607031	0.069335	0.11422		8479	0.116644	0.011353	2.32964		8434.2947 0.96627067
8479.99	0.598587	0.076152	0.127219		8480	0.606762	0.069123	0.11392		8480	0.116848	0.011297	2.3363		8436.2207 0.96833638
8481	0.599286	0.07634	0.127384		8480.99	0.606483	0.069012	0.11379		8481	0.11713	0.011274	2.34075		8438.1662 0.97066035
8482	0.596342	0.075872	0.127229		8482	0.605893	0.068967	0.113828		8482	0.117434	0.011275	2.3433		8440.1313 0.97369028
8483	0.596664	0.075798	0.127036		8483	0.606641	0.069062	0.113843		8483	0.117789	0.011291	2.3449		8442.1159 0.97790444
8485	0.596144	0.075758	0.12708		8485	0.607053	0.06905	0.113745		8485	0.118569	0.011396	2.34224		8444.1155 0.98641271
8487	0.595305	0.075415	0.126682		8487	0.607851	0.068735	0.113079		8487	0.118975	0.011559	2.33147		8446.1348 1.0009098
8489	0.594807	0.075307	0.126608		8489	0.60807	0.06898	0.113441		8489	0.119122	0.011828	2.30968		8448.1783 1.0192056
8491	0.594956	0.07502	0.126093		8491	0.607143	0.068759	0.113249		8491	0.119475	0.012257	2.277		8450.2369 1.0347988
8492.99	0.59567	0.075133	0.126132		8493	0.606237	0.068564	0.113097		8492.99	0.11976	0.012817	2.2347		8452.3153 1.0412489
8495	0.596102	0.075059	0.125916		8495	0.605484	0.06847	0.113084		8495	0.120069	0.013545	2.18204		8454.4133 1.0386232
8497	0.596327	0.074938	0.125665		8497	0.604588	0.068601	0.113468		8497	0.120691	0.014428	2.12408		8456.5265 1.0294425
8499	0.596656	0.07479	0.125349		8499	0.604333	0.068353	0.113105		8499	0.121009	0.015397	2.06168		8458.6641 1.0141684
8501	0.595907	0.074542	0.12509		8501	0.605558	0.068545	0.113193		8501	0.121494	0.01645	1.99953		8460.8169 0.99365395
8503	0.595285	0.07472	0.125519		8502.97	0.605936	0.068603	0.113218		8503	0.122005	0.017484	1.94278		8462.9896 0.97149429
8504.98	0.594899	0.074602	0.125404		8505	0.606092	0.068527	0.113064		8505	0.122291	0.018336	1.89752		8465.1821 0.94956841
8506.98	0.595879	0.074609	0.125208		8507	0.604884	0.068592	0.113397		8506.97	0.122376	0.018875	1.86925		8467.3946 0.93241420
8509.01	0.596512	0.074707	0.125239		8509	0.604668	0.068688	0.113597		8509	0.122803	0.019136	1.85902		8469.6224 0.92741389
8510.98	0.596046	0.074698	0.125323		8511	0.604257	0.068541	0.113431		8511	0.123124	0.019035	1.8669		8471.8701 0.93872725
8512.99	0.594384	0.07444	0.125239		8513	0.605026	0.068864	0.113819		8513	0.123666	0.018699	1.8891		8474.1379 0.96315682
8515	0.593596	0.074408	0.125352		8515	0.606048	0.069184	0.114157		8515	0.12438	0.018246	1.91938		8476.4256 0.99322665
8517	0.593794	0.074645	0.125709		8517	0.606552	0.069169	0.114036		8517	0.125069	0.017752	1.9524		8478.7335 1.0192600
8519	0.594596	0.074648	0.125544		8519	0.606434	0.069357	0.114369		8519	0.125296	0.017231	1.98396		8481.0568 1.0339228
8521	0.595254	0.075003	0.126002		8521	0.600424	0.068731	0.114471		8521	0.125685	0.016831	2.01055		8483.4002 1.0345382
8523	0.595541	0.0751	0.126104		8522.99	0.600523	0.068932	0.114786		8523	0.126163	0.016532	2.03228		8485.7638 1.0247391
8525	0.595232	0.07531	0.126521		8525.01	0.599514	0.068779	0.114725		8525	0.126262	0.01629	2.04784		8488.1476 1.0117067
8527	0.594524	0.075174	0.126443		8527	0.599844	0.069102	0.1152		8527	0.1265	0.016204	2.05498		8490.5469 1.0026708
8528.98	0.594315	0.075414	0.126893		8529	0.600786	0.069145	0.115091		8529	0.126903	0.01625	2.05533		8492.9712 1.0017717
8531	0.594078	0.075376	0.126878		8531	0.60128	0.069235	0.115145		8530.98	0.127386	0.016389	2.05062		8495.4064 1.0089150
8532.99	0.595724	0.075831	0.127292		8533	0.601599	0.069373	0.115314		8533	0.127862	0.016565	2.04364		8497.8666 1.0181595
8535	0.598267	0.076118	0.127231		8535	0.601056	0.069404	0.11547		8535	0.128126	0.016726	2.03605		8500.3425 1.0276048
8537	0.60028	0.076451	0.12736		8536.98	0.600308	0.0695	0.115775		8536.98	0.128587	0.01694	2.02692		8502.8387 1.0363881
8539	0.599475	0.076669	0.127894		8539	0.599472	0.069458	0.115866		8539	0.128838	0.017138	2.01726		8505.3555 1.0413919
8541	0.598731	0.076553	0.127859		8541	0.600047	0.069609	0.116005		8540.99	0.129151	0.017389	2.00517		8507.8879 1.0418752
8543	0.598443	0.076779	0.128298		8543.01	0.600581	0.06995	0.116471		8543.01	0.129259	0.017646	1.9913		8510.4409 1.0374918
8545	0.598783	0.076661	0.128028		8544.96	0.601429	0.06995	0.116307		8545	0.129583	0.017913	1.97878		8513.0144 1.0285576
8547	0.599265	0.077021	0.128525		8547	0.601267	0.070119	0.116619		8547	0.129953	0.018078	1.97248		8515.6084 1.0146619
8549	0.599857	0.077031	0.128415		8549	0.601113	0.070207	0.116795		8549	0.13038	0.018095	1.97484		8518.2184 0.99610295
8551	0.600187	0.077258	0.128724		8551	0.600918	0.070198	0.116818		8551	0.131525	0.017994	1.98916		8520.8442 0.97588738
8553	0.599547	0.077318	0.128961		8553	0.600407	0.07023	0.116971		8553	0.13175	0.017647	2.01033		8523.4955 0.95357876
8555	0.598972	0.077223	0.128926		8555	0.600702	0.070198	0.11686		8555	0.132278	0.017263	2.03637		8526.1627 0.93344870
8557	0.598444	0.07711	0.12885		8556.99	0.601421	0.070487	0.117201		8556.97	0.13267	0.016927	2.05893		8528.8507 0.92000218
8558.98	0.598727	0.077206	0.128951		8559	0.601957	0.070692	0.117437		8559	0.132995	0.016652	2.07781		8531.5547 0.91671246
8561	0.59959	0.077353	0.12901		8561	0.602082	0.070587	0.117239		8560.99	0.133127	0.016453	2.09081		8534.2796 0.92474998
8563	0.60016	0.077296	0.128792		8563	0.601523	0.070686	0.117512		8563	0.133426	0.01633	2.10053		8537.0205 0.94343117
8565	0.600018	0.077499	0.129161		8565	0.600974	0.07062	0.11751		8565	0.133775	0.016288	2.10574		8539.7823 0.96782908
8567	0.598922	0.077284	0.129039		8567	0.599554	0.070522	0.117624		8566.99	0.133939	0.016302	2.10608		8542.5651 0.99123635
8568.97	0.591688	0.076432	0.129177		8568.99	0.593842	0.069874	0.117664		8569	0.133258	0.01631	2.10053		8545.3641 1.0111933
8571.01	0.597483	0.077149	0.129124		8570.98	0.600595	0.070855	0.117975		8571.01	0.134928	0.016713	2.08854		8548.1841 1.0256155
8573	0.592464	0.076695	0.12945		8573	0.595518	0.070193	0.11787		8573	0.13398	0.016905	2.07005		8551.0251 1.0339989
8575	0.589515	0.07619	0.129241		8575	0.591263	0.069643	0.117787		8575	0.1337	0.017288	2.04561		8553.8825 1.0366072
8576.99	0.589003	0.076069	0.129148		8577	0.590519	0.06966	0.117964		8576.99	0.133882	0.017807	2.01734		8556.7562 1.0348454
8578.97	0.588921	0.076085	0.129193		8579	0.589992	0.069638	0.118032		8579	0.134113	0.018397	1.98648		8559.6510 1.0309572
8581	0.588522	0.076111	0.129325		8581	0.590242	0.069533	0.117805		8581	0.134445	0.019009	1.95626		8562.5671 1.0267277
8583	0.589308	0.076224	0.129345		8583	0.592396	0.069832	0.117881		8583	0.134861	0.01963	1.92718		8565.4996 1.0216217
8586	0.588816	0.076028	0.129121		8586	0.591713	0.069623	0.117663		8585.99	0.135143	0.020331	1.89416		8568.4534 1.0169391
8589	0.596163	0.077055	0.129251		8588.97	0.599063	0.070517	0.117712		8589	0.136445	0.021044	1.86931		8571.4237 1.0138442
8592	0.598637	0.077506	0.129471		8592.01	0.600645	0.070596	0.117534		8592	0.137468	0.021522	1.8543		8574.4154 1.0124006
8595	0.599213	0.077646	0.129581		8594.97	0.600773	0.070842	0.117918		8595	0.138092	0.021716	1.84986		8577.4237 1.0103994
8598	0.597883	0.077483	0.129596		8597.96	0.598714	0.070644	0.117993		8598	0.138271	0.021741	1.85004		8580.4534 1.0066923
8601	0.573477	0.074229	0.129436		8601	0.575129	0.068141	0.11848		8600.98	0.13337	0.020979	1.8496		8583.4998 1.0024656
8604	0.595291	0.076962	0.129285		8604	0.597533	0.070661	0.118254		8604	0.138532	0.02186	1.84646		8586.5677 0.99856925
8606.97	0.600187	0.07757	0.129244		8607	0.602719	0.071179	0.118096		8606.97	0.139987	0.022164	1.84307		8589.6524 0.99676458
8610	0.600713	0.077834	0.129569		8610.01	0.603419	0.071447	0.118404		8609.99	0.140726	0.022347	1.84013		8592.7587 0.99845559
8612.97	0.601201	0.077791	0.129392		8613	0.60302	0.071228	0.11812		8613	0.141429	0.022487	1.83884		8595.8818 1.0005056
8616	0.598644	0.077294	0.129115		8616	0.600351	0.070957	0.118192		8616	0.141506	0.022468	1.84024		8599.0265 0.99961908
8619	0.592003	0.076481	0.129191		8619	0.594768	0.070408	0.118379		8619	0.14059	0.02221	1.84532		8602.1882 0.99483947
8621.98	0.588101	0.076036	0.129292		8622	0.592057	0.070187	0.118547		8621.97	0.140458	0.022016	1.85316		8605.3669 0.98751461
8625	0.588757	0.07609	0.129238		8625	0.592934	0.070132	0.118279		8625	0.140889	0.021936	1.85985		8608.5673 0.98038330
8628	0.58708	0.075893	0.129273		8628	0.590919	0.070529	0.119355		8627.96	0.141076	0.021845	1.86534		8611.7848 0.97753357
8630.98	0.587374	0.076116	0.129586		8630.98	0.589767	0.070259	0.11913		8631	0.141116	0.021778	1.86869		8615.0241 0.97647355
8633.97	0.599252	0.077689	0.129644		8634	0.600014	0.071515	0.119189		8634	0.145694	0.022449	1.87025		8618.2806 0.97849767
8637.01	0.600072	0.077597	0.129314		8637	0.601479	0.071887	0.119517		8637	0.146951	0.022611	1.87165		8621.5542 0.98443412
8639.97	0.599628	0.077646	0.12949		8639.98	0.602688	0.071962	0.119401		8639.98	0.14775	0.022702	1.87307		8624.8498 0.98987812
8642.96	0.600106	0.077858	0.129741		8642.98	0.603361	0.072431	0.120046		8642.96	0.148529	0.022768	1.87541		8628.1627 0.99807524
8646.01	0.600319	0.077925	0.129807		8645.97	0.605047	0.072512	0.119846		8646	0.148997	0.022746	1.87953		8631.4976 1.0050531
8648.96	0.601324	0.078186	0.130023		8649.01	0.607071	0.07278	0.119887		8649	0.149583	0.022705	1.88528		8634.8499 1.0122123
8652	0.600385	0.07826	0.130349		8651.97	0.607138	0.073044	0.120308		8652	0.14988	0.022665	1.88899		8638.2195 1.0173460
8655	0.60035	0.078232	0.130311		8655	0.607173	0.073085	0.120369		8655	0.150437	0.022798	1.88688		8641.6114 1.0197858
8658	0.599819	0.078449	0.130788		8658	0.607358	0.073169	0.120471		8657.98	0.151038	0.02308	1.87859		8645.0158 1.0204489
8661	0.599682	0.078542	0.130972		8661	0.60767	0.073005	0.120139		8661	0.151758	0.02351	1.86488		8648.4474 1.0206154
8663.96	0.599666	0.078471	0.130858		8664	0.606874	0.073427	0.120993		8664	0.152442	0.024021	1.84787		8651.8916 1.0191988
8667	0.585222	0.076791	0.131216		8666.99	0.591948	0.07179	0.121277		8667	0.149172	0.023935	1.82977		8655.3583 1.0140381
8670	0.602253	0.079081	0.131308		8670	0.608786	0.073854	0.121314		8670	0.154258	0.025237	1.81032		8658.8426 1.0046969
8673	0.600946	0.079207	0.131803		8673	0.60757	0.073652	0.121224		8672.97	0.154611	0.025732	1.79318		8662.3494 0.99422574
8676	0.60043	0.079007	0.131584		8676	0.607874	0.073718	0.121272		8676	0.154923	0.026085	1.78158		8665.8690 0.98686016
8679	0.600724	0.079078	0.131638		8679	0.608847	0.073959	0.121474		8679	0.15413	0.026114	1.77533		8669.4112 0.98395395
8682	0.600939	0.079326	0.132003		8681.99	0.608784	0.073931	0.12144		8681.99	0.154695	0.026264	1.77325		8672.9711 0.98521877
8684.98	0.601348	0.079296	0.131863		8684.98	0.608568	0.074181	0.121894		8685	0.155366	0.02642	1.77167		8676.5538 0.98872298
8687.99	0.601948	0.079392	0.131892		8688	0.607997	0.07391	0.121563		8688	0.156159	0.026683	1.76683		8680.1494 0.99176481
8690.97	0.601594	0.079534	0.132205		8690.98	0.607607	0.07409	0.121938		8691	0.156778	0.027043	1.7574		8683.7678 0.99351327
8694	0.600414	0.079252	0.131996		8694	0.607535	0.074073	0.121924		8694	0.157274	0.027531	1.74266		8687.4041 0.99276315
8697	0.601032	0.079372	0.132059		8697	0.608372	0.074295	0.122121		8697	0.157708	0.028078	1.72576		8691.0634 0.99076575
8700	0.601611	0.079405	0.131988		8700	0.608783	0.074569	0.122488		8699.98	0.158194	0.028569	1.71152		8694.7357 0.99017525
8703	0.602289	0.079507	0.132009		8703	0.608488	0.07439	0.122253		8703	0.158855	0.028901	1.70411		8698.4311 0.99269841
8706	0.601845	0.07936	0.131861		8706	0.607861	0.074315	0.122256		8706	0.159319	0.029089	1.70056		8702.1445 0.99771379
8708.98	0.601341	0.079662	0.132475		8709	0.607483	0.074516	0.122663		8708.99	0.159935	0.029275	1.69805		8705.8762 1.0020834
8712	0.600324	0.079535	0.132488		8712	0.606966	0.074263	0.122351		8712	0.160601	0.029478	1.69528		8709.6260 1.0064123
8715	0.600463	0.079405	0.132239		8715	0.60777	0.074662	0.122847		8715	0.161379	0.029705	1.69244		8713.3990 1.0107230
8718	0.601177	0.079667	0.132518		8718	0.608958	0.07468	0.122636		8718	0.162153	0.029889	1.69105		8717.1853 1.0148843
8721	0.601369	0.079763	0.132636		8720.97	0.609085	0.074623	0.122516		8721	0.162704	0.029999	1.69076		8720.9950 1.0184800
8724	0.601874	0.079714	0.132442		8724	0.608085	0.074687	0.122823		8723.98	0.162876	0.030043	1.69038		8724.8230 1.0177438
8727	0.601995	0.079783	0.132532		8726.97	0.60746	0.074851	0.12322		8727	0.16356	0.030158	1.69073		8728.6695 1.0157033
8730	0.601204	0.079855	0.132826		8730	0.60771	0.074706	0.122931		8730	0.164692	0.03033	1.69194		8732.5344 1.0131756
8733	0.600392	0.079784	0.132887		8733	0.608271	0.074916	0.123163		8733	0.165815	0.030501	1.69312		8736.4179 1.0091276
8737	0.601639	0.080025	0.133012		8737	0.609061	0.074962	0.123078		8736.97	0.166777	0.030621	1.69497		8740.3199 1.0035294
8741	0.605304	0.080603	0.133161		8741	0.60857	0.074992	0.123227		8741	0.167936	0.030806	1.69588		8744.2405 0.99516513
8745	0.607536	0.080832	0.133049		8745	0.608001	0.075139	0.123583		8745	0.169054	0.031013	1.69582		8748.1849 0.98823832
8749	0.608118	0.080797	0.132865		8748.99	0.607327	0.075248	0.1239		8749	0.169426	0.031106	1.69501		8752.1429 0.98531098
8752.95	0.607318	0.080859	0.133142		8753	0.607365	0.075091	0.123634		8752.95	0.170009	0.031237	1.69424		8756.1246 0.98654186
8757.01	0.606243	0.081019	0.133641		8757	0.608019	0.075352	0.12393		8757	0.170711	0.031436	1.69203		8760.1202 0.99027529
8761	0.606075	0.081062	0.133749		8760.99	0.609074	0.075473	0.123914		8760.97	0.171654	0.031775	1.68679		8764.1396 0.99546753
8765	0.605822	0.080945	0.133612		8765	0.608313	0.075464	0.124054		8764.95	0.1722	0.032127	1.67894		8768.1729 0.99904915
8769	0.606883	0.081194	0.133788		8769	0.60861	0.075819	0.124578		8768.99	0.173842	0.032807	1.66752		8772.2302 0.99962651
8773	0.607764	0.08125	0.133686		8772.99	0.607685	0.075726	0.124613		8772.96	0.174489	0.033407	1.65309		8776.3015 0.99877442
8777	0.607355	0.081188	0.133674		8776.99	0.607255	0.075923	0.125027		8776.98	0.174796	0.033976	1.63797		8780.3968 0.99802813
8781	0.606243	0.081403	0.134275		8781	0.607482	0.076079	0.125237		8781	0.175334	0.034513	1.62535		8784.5113 0.99777235
8784.96	0.605153	0.081326	0.134389		8784.99	0.607919	0.076208	0.125359		8785	0.175928	0.034954	1.61605		8788.6398 0.99748572
8789	0.604823	0.081384	0.134559		8788.99	0.606748	0.076258	0.125683		8788.99	0.17692	0.03536	1.61012		8792.7926 0.99690669
8793.01	0.608288	0.081739	0.134375		8793	0.609176	0.076514	0.125603		8792.97	0.178677	0.035856	1.60607		8796.9595 0.99688352
8796.97	0.608258	0.081859	0.13458		8797	0.607807	0.076311	0.125552		8797	0.179082	0.036059	1.60269		8801.1458 0.99799084
8801	0.606795	0.081692	0.134629		8801	0.607112	0.076548	0.126086		8801	0.179631	0.036359	1.59746		8805.3564 0.99968243
8804.98	0.606389	0.081908	0.135076		8804.99	0.6071	0.076572	0.126128		8804.99	0.180544	0.036772	1.59124		8809.5814 1.0005467
8809	0.606244	0.082065	0.135366		8809	0.608627	0.076953	0.126438		8809	0.181516	0.037282	1.58284		8813.8258 1.0023609
8813	0.606151	0.082136	0.135505		8813	0.608397	0.076867	0.126343		8812.99	0.182518	0.037912	1.57158		8818.0898 1.0058212
8817	0.606721	0.082105	0.135326		8817	0.607027	0.076956	0.126775		8817	0.183565	0.038517	1.56147		8822.3732 1.0090669
8820.99	0.607294	0.082486	0.135825		8820.96	0.606791	0.076993	0.126886		8821	0.184146	0.038971	1.55292		8826.6763 1.0103370
8824.99	0.606803	0.082312	0.135649		8825.01	0.607141	0.077213	0.127175		8824.96	0.184632	0.039319	1.54667		8830.9990 1.0090728
8828.98	0.605329	0.082438	0.136187		8828.96	0.607554	0.077285	0.127207		8828.96	0.185474	0.039784	1.53945		8835.3363 1.0072360
8832.95	0.605064	0.082527	0.136395		8833	0.607831	0.077432	0.12739		8832.95	0.18635	0.040256	1.53237		8839.6984 1.0053897
8837	0.60627	0.082748	0.136487		8836.92	0.607334	0.077656	0.127863		8836.97	0.187573	0.040733	1.52713		8844.0753 1.0040448
8841	0.606505	0.082878	0.136649		8840.99	0.606712	0.077601	0.127905		8841	0.188246	0.041066	1.52258		8848.4720 1.0024437
8844.99	0.605955	0.082744	0.136552		8844.93	0.605504	0.077673	0.128278		8844.99	0.188853	0.041374	1.51832		8852.8886 1.0004785
8849	0.604804	0.082838	0.136967		8849	0.606188	0.077706	0.128187		8848.99	0.189675	0.041652	1.51596		8857.3251 0.99903720
8852.96	0.604439	0.082876	0.137113		8853	0.607044	0.078167	0.128767		8853	0.19042	0.041884	1.51433		8861.7817 0.99673245
8857.01	0.600111	0.082338	0.137205		8857	0.602613	0.077563	0.128712		8856.97	0.190158	0.041885	1.51293		8866.2532 0.99547557
8861	0.606468	0.083258	0.137283		8861	0.607408	0.07843	0.129122		8861	0.19287	0.042499	1.51254		8870.7448 0.99542752
8865	0.606296	0.08322	0.13726		8865	0.606741	0.07833	0.1291		8865	0.193752	0.042706	1.51225		8875.2566 0.99592281
8869	0.60584	0.083217	0.137358		8868.99	0.606208	0.078694	0.129814		8869	0.194594	0.042888	1.51233		8879.7886 0.99738814
8872.95	0.604346	0.083122	0.13754		8872.99	0.606502	0.078806	0.129935		8873	0.194833	0.042944	1.51224		8884.3357 0.99672759
8877	0.603571	0.0833	0.138012		8877	0.607231	0.07886	0.129868		8877	0.195677	0.043218	1.51021		8888.9083 0.99607250
8880.95	0.60222	0.082873	0.137612		8881	0.605272	0.078667	0.129969		8881	0.196295	0.043551	1.50568		8893.4909 0.99562752
8885	0.604883	0.083528	0.13809		8885	0.605975	0.079074	0.13049		8884.99	0.198048	0.04427	1.49821		8898.0992 0.99611417
8889	0.605096	0.083441	0.137896		8889	0.604473	0.078996	0.130685		8889	0.198953	0.044934	1.48788		8902.7279 0.99688227
8893	0.604096	0.083626	0.138432		8892.93	0.604963	0.079312	0.131103		8893	0.199656	0.045598	1.47673		8907.3721 0.99937183
8897	0.603403	0.083511	0.138401		8896.97	0.605803	0.079344	0.130973		8897	0.200067	0.046148	1.4668		8912.0316 1.0028005
8900.99	0.597194	0.082655	0.138406		8901.01	0.602155	0.07924	0.131594		8900.96	0.198872	0.04628	1.45795		8916.7169 1.0062768
8904.99	0.597256	0.083012	0.13899		8904.99	0.60307	0.079457	0.131753		8904.99	0.200053	0.046913	1.45029		8921.4178 1.0077500
8908.97	0.603801	0.083877	0.138915		8909	0.609061	0.080692	0.132486		8908.97	0.203092	0.047942	1.44366		8926.1394 1.0066398
8913.01	0.60439	0.084085	0.139124		8913	0.609304	0.080805	0.132618		8913	0.203891	0.048422	1.43762		8930.8767 1.0041566
8917	0.604121	0.083892	0.138866		8917	0.609903	0.08107	0.132922		8917	0.204914	0.048958	1.43163		8935.6348 1.0011417
8921	0.60322	0.084011	0.139271		8920.97	0.609892	0.081368	0.133413		8921	0.204517	0.049103	1.42674		8940.4138 0.99873988
8924.99	0.602168	0.084049	0.139578		8925	0.609735	0.081847	0.134235		8925	0.205146	0.049526	1.42124		8945.2086 0.99864202
8928.99	0.602044	0.084088	0.139671		8928.94	0.608962	0.082098	0.134816		8928.95	0.205773	0.04996	1.41554		8950.0244 0.99879084
8932.95	0.602332	0.084061	0.13956							8932.95	0.206591	0.05043	1.41015		8954.8614 0.99970106
8937.7	0.602323	0.084259	0.13989							8937.71	0.20801	0.051057	1.40464		8959.7142 0.99958127
8942.7	0.602559	0.084525	0.140276							8943.01	0.209381	0.051769	1.39738		8964.5882 0.99790648
8947.66	0.600468	0.084481	0.140692							8947.67	0.210096	0.052319	1.39021		8969.4783 0.99652237
8952.65	0.601536	0.08458	0.140606							8952.71	0.210918	0.052972	1.38172		8974.3897 0.99568620
8957.7	0.602156	0.084987	0.141138							8957.72	0.211943	0.053629	1.37423		8979.3172 0.99630016
8962.68	0.600999	0.084678	0.140896							8963	0.213086	0.054337	1.36649		8984.2661 0.99676959
8968	0.599276	0.084778	0.141468							8967.71	0.214573	0.055024	1.36088		8989.2365 0.99724618
8973	0.599271	0.084926	0.141716							8972.72	0.216047	0.055694	1.35562		8994.2232 0.99712597
8978	0.599805	0.085176	0.142006							8977.7	0.216763	0.056198	1.34992		8999.2262 0.99704604
8983	0.599363	0.085189	0.142133							8983.01	0.218106	0.056853	1.34451		9004.2509 0.99751606
8987.69	0.596223	0.084882	0.142367							8987.7	0.218516	0.057213	1.34008		9009.2973 0.99782159
8993	0.586949	0.083654	0.142523							8992.71	0.21708	0.057099	1.33549		9014.3602 0.99783863
8997.72	0.591461	0.084313	0.142551							8998	0.220231	0.058222	1.33042		9019.4396 0.99831759
9002.69	0.594252	0.084967	0.142981							9003.01	0.223033	0.059214	1.32616		9024.5410 0.99933972
9008	0.599038	0.085678	0.143026							9008	0.225517	0.0602	1.32072		9029.6643 1.0001782
9012.68	0.599056	0.085871	0.143345							9013	0.226109	0.060715	1.31482		9034.7989 0.99972543
9017.68	0.598426	0.085929	0.143592							9018	0.226932	0.061261	1.30951		9039.9609 0.99795000
9023	0.596797	0.08591	0.143952							9023	0.22786	0.061889	1.3034		9045.1344 0.99696778
9027.7	0.597063	0.085925	0.143913							9028	0.22924	0.062672	1.29686		9050.3301 0.99582527
9033.01	0.597638	0.08617	0.144184							9033	0.230493	0.063473	1.28961		9055.5481 0.99503579
9037.69	0.598773	0.086383	0.144267							9038	0.231768	0.064323	1.28182		9060.7830 0.99471332
9043	0.601575	0.086937	0.144515							9043	0.233156	0.065177	1.2746		9066.0349 0.99455718
9047.67	0.59971	0.08701	0.145086							9048	0.233322	0.065681	1.2676		9071.3039 0.99476744
9052.76	0.600408	0.087138	0.145131							9053	0.235198	0.066668	1.26071		9076.5954 0.99536054
9058.01	0.600618	0.087183	0.145156							9057.7	0.236582	0.067445	1.25498		9081.4384 0.99502726
9062.75	0.599575	0.087128	0.145317							9063	0.236499	0.067895	1.24798
9068.01	0.6014	0.087675	0.145785							9067.76	0.23817	0.068868	1.2408
9072.79	0.60072	0.08752	0.145691							9072.86	0.239424	0.069702	1.23401
9078.01	0.599145	0.087457	0.14597							9078	0.240793	0.070582	1.22716
9083	0.599715	0.087673	0.146191							9082.75	0.241878	0.071276	1.22188
9087.7	0.600129	0.087815	0.146327							9087.7	0.243218	0.072076	1.21624
9092.75	0.599456	0.087763	0.146405							9092.73	0.244381	0.072936	1.20915
9097.74	0.599007	0.087962	0.146846							9098	0.244698	0.073527	1.20237
9102.69	0.598389	0.087998	0.147058							9103	0.245773	0.074338	1.19578
9107.76	0.597013	0.087905	0.147241							9107.76	0.246959	0.075154	1.18968
9113.01	0.596659	0.088316	0.148018							9112.73	0.248055	0.075924	1.18392
9118	0.594966	0.087851	0.147656							9117.73	0.248813	0.076564	1.17857
9123	0.582808	0.086495	0.148411							9123	0.244642	0.075693	1.17311
9128	0.571604	0.084469	0.147775							9127.76	0.237987	0.073953	1.16879
9132.76	0.603603	0.089358	0.148041							9133	0.255711	0.079921	1.16301

## Sheet: Figure 1h
energy	Ni/POM@MOF	Ni/POM
8132.99	0.00197	0.00235
8138.01	0.00606	0.00558
8143	0.00635	0.00464
8148	0.00194	0.00101
8152.6	-6.85205e-06	0.00247
8157.79	0.000228474	0.00193
8162.64	0.000600827	-0.000752305
8167.77	0.000457566	0.00272
8172.99	0.00269	0.00307
8177.99	0.00136	0.00337
8182.99	0.00135	0.00279
8187.8	0.0032	0.000577278
8192.99	0.000722196	-0.000185102
8197.84	0.00183	0.000346168
8203	-0.00057812	0.00171
8207.83	-0.000513097	-0.00101
8213	0.00148	0.000131475
8217.83	-0.00154	-7.23043e-05
8222.83	-0.000190827	0.000940538
8227.82	-0.00177	-0.00171
8232.8	-0.00364	-0.00133
8237.99	-0.00215	0.000117718
8242.99	0.000163626	-0.00187
8248	-0.00267	-0.000238837
8253	-0.00232	-0.00141
8258	0.000713883	-0.000595228
8263	-0.00112	-0.00214
8268	-0.00376	-0.00244
8273	-0.000444756	0.000319023
8278	-0.000395083	5.25301e-05
8283.01	0.00191	-0.0008993
8287.87	0.00261	0.000892899
8292.85	0.00104	0.00138
8297.56	0.00102	0.0023
8302.55	0.00368	0.00233
8308	0.00737	0.00535
8312.85	0.01195	0.01187
8317.78	0.03584	0.03663
8318.3	0.03373	0.03416
8318.6	0.03428	0.03177
8318.9	0.03315	0.03053
8319.2	0.02908	0.03158
8319.5	0.02781	0.03141
8319.8	0.03076	0.03247
8320.1	0.03067	0.03531
8320.4	0.0315	0.03778
8320.7	0.03602	0.0433
8321	0.03983	0.04638
8321.31	0.04298	0.05204
8321.6	0.0462	0.05689
8321.9	0.05309	0.06251
8322.2	0.0584	0.06719
8322.5	0.06631	0.0717
8322.8	0.07251	0.07465
8323.1	0.08088	0.07955
8323.4	0.09192	0.08634
8323.7	0.10163	0.09426
8324	0.11459	0.10563
8324.3	0.1274	0.12037
8324.61	0.14408	0.13558
8324.9	0.16924	0.15153
8325.2	0.19259	0.1707
8325.5	0.21858	0.19115
8325.8	0.24449	0.21208
8326.1	0.27512	0.23754
8326.4	0.30854	0.2645
8326.7	0.34577	0.29636
8327	0.3848	0.33197
8327.3	0.4264	0.37232
8327.6	0.4711	0.41277
8327.91	0.51804	0.45945
8328.2	0.57267	0.50773
8328.5	0.62947	0.56028
8328.8	0.69346	0.61383
8329.1	0.76286	0.67157
8329.4	0.83903	0.7335
8329.7	0.91334	0.79661
8330	0.99671	0.86921
8330.3	1.07987	0.94047
8330.6	1.16215	1.01097
8330.9	1.23849	1.08951
8331.2	1.31332	1.16698
8331.5	1.37775	1.24326
8331.8	1.44052	1.31622
8332.1	1.49667	1.39127
8332.4	1.54571	1.45979
8332.7	1.58179	1.51736
8333	1.61038	1.57472
8333.31	1.62891	1.61945
8333.6	1.64544	1.64332
8333.9	1.65206	1.66494
8334.2	1.64813	1.67187
8334.5	1.64096	1.66737
8334.8	1.62928	1.65064
8335.1	1.61838	1.62635
8335.4	1.60225	1.60027
8335.71	1.57824	1.57347
8336	1.55994	1.53742
8336.3	1.53307	1.50278
8336.59	1.51244	1.47632
8336.9	1.48683	1.44523
8337.2	1.46077	1.41863
8337.5	1.43105	1.39429
8337.8	1.40707	1.36671
8338.1	1.37555	1.3454
8338.4	1.35174	1.3205
8338.7	1.32482	1.29608
8339	1.3014	1.27241
8339.3	1.27796	1.25036
8339.6	1.25499	1.22579
8339.9	1.23097	1.20368
8340.2	1.21106	1.17768
8340.5	1.19312	1.15493
8340.8	1.17078	1.13169
8341.1	1.15588	1.1118
8341.4	1.13797	1.09513
8341.7	1.12637	1.07462
8342	1.10745	1.05705
8342.3	1.09876	1.04128
8342.6	1.08582	1.02623
8342.91	1.07598	1.0147
8343.2	1.06902	1.00357
8343.5	1.05972	0.99525
8343.8	1.04882	0.98698
8344.1	1.04179	0.97533
8344.4	1.0341	0.96971
8344.7	1.02992	0.96056
8345	1.02188	0.95653
8345.3	1.01599	0.95207
8345.59	1.0078	0.94721
8345.9	1.0003	0.94299
8346.2	0.99487	0.93834
8346.5	0.988	0.93544
8346.8	0.98403	0.93092
8347.1	0.9758	0.93209
8347.4	0.97162	0.93289
8347.7	0.96387	0.92979
8348	0.96054	0.92601
8348.3	0.95617	0.92664
8348.6	0.95105	0.92692
8348.9	0.94937	0.92394
8349.2	0.94347	0.92192
8349.5	0.93732	0.91712
8349.8	0.9291	0.91532
8350.1	0.92408	0.91331
8350.4	0.92304	0.90949
8350.7	0.91738	0.90542
8351	0.9142	0.89854
8351.3	0.91253	0.89505
8351.6	0.90438	0.88674
8351.91	0.89985	0.87985
8352.2	0.89578	0.87651
8352.5	0.89401	0.87111
8352.8	0.8876	0.86509
8353.1	0.8831	0.85822
8353.4	0.87903	0.85408
8353.7	0.87448	0.84811
8354	0.87284	0.83876
8354.3	0.86795	0.83679
8354.6	0.86407	0.83321
8354.9	0.85671	0.82662
8355.2	0.85222	0.81902
8355.5	0.84799	0.81391
8355.8	0.8415	0.80956
8356.1	0.83784	0.80294
8356.4	0.83414	0.80052
8356.7	0.82832	0.79442
8357	0.82296	0.78987
8357.3	0.82129	0.78461
8357.6	0.81719	0.7816
8357.9	0.81505	0.77807
8358.2	0.80802	0.77382
8358.5	0.80755	0.76904
8358.81	0.80534	0.7652
8359.1	0.80417	0.76354
8359.41	0.79805	0.76083
8359.71	0.79891	0.75862
8360	0.799	0.75523
8360.3	0.79674	0.75614
8360.6	0.79305	0.75448
8360.9	0.793	0.75393
8361.2	0.79219	0.75346
8361.5	0.79178	0.75466
8361.8	0.79745	0.75732
8362.1	0.80001	0.75764
8362.4	0.79663	0.75976
8362.7	0.80324	0.76246
8363.01	0.8058	0.76571
8364	0.82029	0.77946
8365	0.84062	0.79776
8366	0.85941	0.81998
8367	0.88616	0.84281
8368	0.91762	0.87218
8369	0.95003	0.89541
8370	0.97611	0.92131
8371	1.00042	0.94691
8372	1.02909	0.96518
8373	1.05257	0.98641
8374	1.07028	1.00341
8374.99	1.08613	1.01982
8376	1.09596	1.0362
8377	1.10042	1.04802
8377.98	1.10852	1.05798
8379	1.11715	1.06783
8380	1.11809	1.07155
8381	1.11287	1.07415
8382.01	1.11011	1.0776
8383	1.11143	1.07695
8383.99	1.10509	1.07137
8385	1.10217	1.07088
8386	1.09808	1.0676
8387	1.09565	1.06384
8387.98	1.09337	1.06244
8389	1.08676	1.05652
8390	1.08105	1.05307
8391	1.07559	1.0527
8392	1.0718	1.04819
8393	1.06868	1.04364
8394	1.064	1.03994
8394.99	1.05915	1.03444
8396	1.05188	1.02956
8397	1.04532	1.0218
8398	1.04194	1.01683
8399	1.03583	1.00963
8400	1.03247	1.00699
8401	1.02554	1.0016
8402	1.02164	0.99671
8403	1.01442	0.99255
8404	1.00717	0.98964
8404.99	1.00369	0.98104
8406	0.99653	0.97975
8407	0.99171	0.97463
8408	0.98719	0.97086
8409	0.98045	0.96649
8410	0.97292	0.96345
8410.98	0.96875	0.96173
8411.99	0.9656	0.95438
8413	0.95994	0.95197
8414	0.95744	0.9491
8414.99	0.96084	0.94794
8415.99	0.95888	0.94386
8417	0.95642	0.94196
8418	0.95341	0.93897
8419	0.95735	0.9396
8420	0.95693	0.93813
8421	0.95742	0.93596
8421.99	0.96547	0.93444
8423	0.96797	0.93438
8424	0.96605	0.93543
8425	0.97143	0.93767
8426	0.9727	0.9373
8427	0.97439	0.94032
8428	0.97692	0.94278
8429	0.98317	0.94366
8430	0.98546	0.94804
8431	0.98801	0.94924
8432	0.98923	0.95198
8433	0.99402	0.95525
8433.99	0.98865	0.96104
8434.98	0.99679	0.96446
8436	1.00029	0.96709
8437	1.00319	0.96664
8438	0.99964	0.97346
8438.98	1.00523	0.97748
8440	1.00682	0.98056
8441	1.00588	0.9826
8442	1.01263	0.98643
8443	1.01244	0.989
8444	1.01364	0.98891
8445	1.01229	0.99091
8446	1.0174	0.99387
8447	1.01995	0.99537
8448	1.02105	0.99705
8449	1.01978	1.00011
8450	1.02072	1.00354
8450.99	1.023	1.00245
8452	1.02454	1.00223
8453	1.02392	1.00453
8454	1.02596	1.00802
8455.01	1.02726	1.01103
8456	1.02558	1.01196
8456.99	1.02674	1.01322
8458	1.02753	1.013
8459	1.03082	1.01447
8460	1.02893	1.01604
8461	1.03338	1.01559
8462	1.03405	1.01439
8463	1.03107	1.01919
8464	1.0321	1.01845
8465	1.03474	1.01764
8465.98	1.03217	1.02077
8467	1.03365	1.02059
8467.99	1.02963	1.01884
8469	1.0329	1.01606
8470	1.03183	1.01658
8470.99	1.02834	1.01687
8473	1.02778	1.01911
8475	1.0272	1.01808
8476	1.02057	1.01647
8477	1.01841	1.01567
8478	1.01921	1.01493
8479	1.01483	1.01575
8480	1.01084	1.01443
8480.99	1.00882	1.01322
8482	1.00871	1.01085
8483	1.00834	1.01216
8485	1.00614	1.01051
8487	0.99743	1.00851
8489	1.00051	1.00849
8491	0.99724	1.00436
8493	0.99443	1.00325
8495	0.99322	0.99803
8497	0.99656	0.99796
8499	0.99134	0.99552
8501	0.99129	0.99275
8502.97	0.99054	0.98938
8505	0.9877	0.98654
8507	0.99047	0.99009
8509	0.99172	0.98858
8511	0.98877	0.98632
8513	0.99218	0.98616
8515	0.99501	0.98651
8517	0.99259	0.98528
8519	0.99537	0.98588
8521	0.9955	0.98875
8522.99	0.99809	0.98677
8525.01	0.99635	0.99057
8527	1.00078	0.99107
8529	0.9985	0.99449
8531	0.9981	0.99331
8533	0.99901	0.99705
8535	0.99979	0.99644
8536.98	1.00228	0.99984
8539	1.0023	0.99881
8541	1.00288	0.99955
8543.01	1.00722	1.00405
8544.96	1.00435	1.00326
8547	1.0069	1.00687
8549	1.00792	1.0039
8551	1.00718	1.00805
8553	1.00794	1.00656
8555	1.00567	1.00896
8556.99	1.0086	1.0107
8559	1.01031	1.0099
8561	1.00705	1.00872
8563	1.00919	1.00919
8565	1.00819	1.00926
8567	1.00851	1.00675
8568.99	1.008	1.0097
8570.98	1.01059	1.00809
8573	1.00841	1.0089
8575	1.00648	1.00792
8577	1.00754	1.01046
8579	1.00735	1.00804
8581	1.00378	1.00669
8583	1.00369	1.00663
8586	0.99975	1.00736
8588.97	0.99889	1.00705
8592.01	0.9954	1.00424
8594.97	0.9984	1.00471
8597.96	0.99784	1.00601
8601	1.00199	1.00628
8604	0.99799	1.00567
8607	0.99477	1.00344
8610.01	0.9969	1.00128
8613	0.99225	1.00015
8616	0.99169	1.0024
8619	0.99245	1
8622	0.993	0.99665
8625	0.98855	0.99659
8628	0.99953	0.99676
8630.98	0.99559	0.99548
8634	0.9949	0.99503
8637	0.99731	0.99716
8639.98	0.99464	0.99692
8642.98	1.00069	0.99306
8645.97	0.99706	0.99392
8649.01	0.99619	0.99546
8651.97	0.99971	0.99527
8655	0.99907	0.99649
8658	0.99892	0.9987
8661	0.9938	0.99755
8664	1.00229	1.00117
8666.99	1.00425	1.00208
8670	1.00337	1.00021
8673	1.00105	1.00271
8676	1.00032	1.00275
8679	1.00135	1.00653
8681.99	0.99969	1.00367
8684.98	1.00363	1.00335
8688	0.99856	1.00591
8690.98	1.00161	1.00378
8694	1.00018	1.00321
8697	1.00119	1.00529
8700	1.00416	1.0025
8703	1.00022	1.00224
8706	0.99902	1.00073
8709	1.00246	1.00008
8712	0.99766	0.99785
8715	1.00213	1.00271
8718	0.99849	1.00196
8720.97	0.99592	0.99879
8724	0.99822	1.00051
8726.97	1.00159	1.00074
8730	0.99707	0.99807
8733	0.99854	0.99804
8737	0.99599	0.99989
8741	0.99613	0.99958
8745	0.99866	0.99957
8748.99	1.00075	0.99977
8753	0.99615	0.99754
8757	0.99802	0.99464
8760.99	0.99631	0.99603
8765	0.99641	0.99945
8769	1.00091	0.99925
8772.99	0.99982	0.99677
8776.99	1.00309	0.99718
8781	1.00402	0.99501
8784.99	1.00395	0.99368
8788.99	1.00621	0.99803
8793	1.00384	0.99786
8797	1.00182	0.99818
8801	1.00651	0.99522
8804.99	1.00557	0.99589
8809	1.00772	0.99507
8813	1.00522	0.99797
8817	1.00879	0.99939
8820.96	1.00869	0.99941
8825.01	1.01061	0.99647
8828.96	1.00963	0.99982
8833	1.01035	0.9969
8836.92	1.01446	1.00061
8840.99	1.01358	1.00125
8844.93	1.01655	1.00078
8849	1.01416	1.00098
8853	1.0195	0.99876
8857	1.01757	1.0013
8861	1.02098	1.00134
8865	1.01944	1.00085
8868.99	1.02636	1.00024
8872.99	1.02648	0.99869
8877	1.02446	0.99825
8881	1.02437	0.99861
8885	1.02911	1.00162
8889	1.03011	0.99656
8892.93	1.03371	0.99962
8896.97	1.03099	0.99645
8901.01	1.0369	1.00005
8904.99	1.03754	0.99838
8909	1.04476	0.99704
8913	1.0451	1.00108
8917	1.04743	0.99899
8920.97	1.05191	0.99952
8925	1.06018	0.99572
8928.94	1.06573	0.99807
		0.9995
		0.99894
		0.9965
		0.99787
		0.99965
		1.00172
		0.99911
		1.00221
		0.99814
		1.00149
		1.00195
		1.00279
		1.00211
		1.00252
		1.00197
		1.00045
		1.00256
		1.00096
		1.00213
		1.00251
		1.0038
		1.00162
		1.00207
		1.00101
		1.00123
		1.0047
		1.00311
		1.00126
		1.00086
		1.00311
		1.00031
		1.0008
		1.00083
		1.00018
		0.99885
		1.0009
		1.00083
		1.00044
		1.00548
		1.00004
		1.00496
		0.99696
		0.99742

## Sheet: Figure 1i
Ni/POM@MOF			Ni-foil	NiO		Ni-POM
R	FT((k2χ (k)) (Å-3)	R	FT((k2χ (k)) (Å-3)	R	FT((k2χ (k)) (Å-3)	R	FT((k2χ (k)) (Å-3)
0	0.23128	0	0.06627	0	0.08311	0	0.15035
0.03068	0.23195	0.03068	0.06714	0.03068	0.08578	0.03068	0.1511
0.06136	0.23378	0.06136	0.06942	0.06136	0.09262	0.06136	0.15304
0.09204	0.23631	0.09204	0.07235	0.09204	0.10102	0.09204	0.15541
0.12272	0.23892	0.12272	0.07503	0.12272	0.10842	0.12272	0.15735
0.1534	0.24109	0.1534	0.07674	0.1534	0.11295	0.1534	0.15828
0.18408	0.24258	0.18408	0.07705	0.18408	0.11359	0.18408	0.15812
0.21476	0.24359	0.21476	0.07594	0.21476	0.11019	0.21476	0.1574
0.24544	0.24482	0.24544	0.0738	0.24544	0.1036	0.24544	0.15714
0.27612	0.24749	0.27612	0.07137	0.27612	0.09579	0.27612	0.15845
0.3068	0.25308	0.3068	0.06965	0.3068	0.08996	0.3068	0.16197
0.33748	0.26297	0.33748	0.06953	0.33748	0.08966	0.33748	0.16749
0.36816	0.27801	0.36816	0.07139	0.36816	0.09658	0.36816	0.17386
0.39884	0.29815	0.39884	0.07486	0.39884	0.10906	0.39884	0.17945
0.42951	0.32249	0.42951	0.07897	0.42951	0.12355	0.42951	0.18277
0.46019	0.34948	0.46019	0.08259	0.46019	0.1366	0.46019	0.18313
0.49087	0.37728	0.49087	0.08477	0.49087	0.14554	0.49087	0.18132
0.52155	0.40403	0.52155	0.08495	0.52155	0.14875	0.52155	0.18019
0.55223	0.42811	0.55223	0.08309	0.55223	0.14576	0.55223	0.18478
0.58291	0.44828	0.58291	0.07984	0.58291	0.13768	0.58291	0.2007
0.61359	0.46381	0.61359	0.07659	0.61359	0.12801	0.61359	0.23098
0.64427	0.47455	0.64427	0.07532	0.64427	0.12335	0.64427	0.27445
0.67495	0.48108	0.67495	0.07787	0.67495	0.1317	0.67495	0.32719
0.70563	0.48465	0.70563	0.08476	0.70563	0.15633	0.70563	0.38459
0.73631	0.48717	0.73631	0.09485	0.73631	0.19357	0.73631	0.44236
0.76699	0.49098	0.76699	0.10611	0.76699	0.23743	0.76699	0.4969
0.79767	0.49843	0.79767	0.11646	0.79767	0.2828	0.79767	0.54551
0.82835	0.51137	0.82835	0.12423	0.82835	0.32586	0.82835	0.58655
0.85903	0.53058	0.85903	0.12835	0.85903	0.36397	0.85903	0.61961
0.88971	0.55561	0.88971	0.12847	0.88971	0.39567	0.88971	0.64551
0.92039	0.58484	0.92039	0.12503	0.92039	0.42078	0.92039	0.66623
0.95107	0.61599	0.95107	0.1195	0.95107	0.44045	0.95107	0.68454
0.98175	0.64658	0.98175	0.11425	0.98175	0.45711	0.98175	0.70337
1.01243	0.67447	1.01243	0.11215	1.01243	0.4741	1.01243	0.72503
1.04311	0.69822	1.04311	0.11505	1.04311	0.49485	1.04311	0.75053
1.07379	0.71745	1.07379	0.12241	1.07379	0.5219	1.07379	0.77937
1.10447	0.73305	1.10447	0.13132	1.10447	0.55598	1.10447	0.80984
1.13515	0.7473	1.13515	0.13787	1.13515	0.59588	1.13515	0.83982
1.16583	0.7638	1.16583	0.13826	1.16583	0.63894	1.16583	0.86774
1.19651	0.78699	1.19651	0.1293	1.19651	0.68205	1.19651	0.89345
1.22718	0.82132	1.22718	0.1087	1.22718	0.7226	1.22718	0.91877
1.25786	0.87011	1.25786	0.07532	1.25786	0.75923	1.25786	0.94752
1.28854	0.93454	1.28854	0.0316	1.28854	0.79232	1.28854	0.98487
1.31922	1.01339	1.31922	0.04131	1.31922	0.82415	1.31922	1.03582
1.3499	1.10332	1.3499	0.11048	1.3499	0.8585	1.3499	1.10335
1.38058	1.19962	1.38058	0.19051	1.38058	0.89974	1.38058	1.18707
1.41126	1.29693	1.41126	0.27536	1.41126	0.95136	1.41126	1.28294
1.44194	1.3898	1.44194	0.35992	1.44194	1.01459	1.44194	1.38406
1.47262	1.47306	1.47262	0.43868	1.47262	1.08751	1.47262	1.48197
1.5033	1.54207	1.5033	0.50601	1.5033	1.16527	1.5033	1.56787
1.53398	1.59289	1.53398	0.55673	1.53398	1.24092	1.53398	1.63359
1.56466	1.62241	1.56466	0.58702	1.56466	1.30652	1.56466	1.67224
1.59534	1.62845	1.59534	0.59587	1.59534	1.35418	1.59534	1.67874
1.62602	1.60979	1.62602	0.58771	1.62602	1.3768	1.62602	1.65006
1.6567	1.56623	1.6567	0.57665	1.6567	1.36876	1.6567	1.5854
1.68738	1.49853	1.68738	0.59067	1.68738	1.3263	1.68738	1.48621
1.71806	1.40843	1.71806	0.66547	1.71806	1.2478	1.71806	1.35609
1.74874	1.29856	1.74874	0.82229	1.74874	1.13398	1.74874	1.20055
1.77942	1.17233	1.77942	1.05746	1.77942	0.98786	1.77942	1.02674
1.8101	1.03386	1.8101	1.35551	1.8101	0.8147	1.8101	0.84313
1.84078	0.88788	1.84078	1.70014	1.84078	0.62166	1.84078	0.65939
1.87146	0.73972	1.87146	2.07637	1.87146	0.4175	1.87146	0.48664
1.90214	0.59542	1.90214	2.47	1.90214	0.21209	1.90214	0.33938
1.93282	0.46231	1.93282	2.86711	1.93282	0.0206	1.93282	0.24013
1.9635	0.35025	1.9635	3.25393	1.9635	0.1644	1.9635	0.21343
1.99418	0.27333	1.99418	3.61713	1.99418	0.31544	1.99418	0.24139
2.02485	0.24517	2.02485	3.94407	2.02485	0.43334	2.02485	0.27858
2.05553	0.26013	2.05553	4.22332	2.05553	0.51535	2.05553	0.30129
2.08621	0.2939	2.08621	4.44506	2.08621	0.56462	2.08621	0.30279
2.11689	0.3268	2.11689	4.60147	2.11689	0.59304	2.11689	0.28371
2.14757	0.34932	2.14757	4.68711	2.14757	0.62404	2.14757	0.24853
2.17825	0.35797	2.17825	4.69907	2.17825	0.68973	2.17825	0.20476
2.20893	0.35238	2.20893	4.63717	2.20893	0.8161	2.20893	0.16364
2.23961	0.334	2.23961	4.5039	2.23961	1.0084	2.23961	0.1404
2.27029	0.30559	2.27029	4.30433	2.27029	1.25447	2.27029	0.1449
2.30097	0.27104	2.30097	4.04582	2.30097	1.53595	2.30097	0.1678
2.33165	0.23537	2.33165	3.73768	2.33165	1.8342	2.33165	0.19282
2.36233	0.20481	2.36233	3.39076	2.36233	2.13196	2.36233	0.20994
2.39301	0.18594	2.39301	3.01688	2.39301	2.4135	2.39301	0.21503
2.42369	0.18261	2.42369	2.62831	2.42369	2.66494	2.42369	0.20798
2.45437	0.1927	2.45437	2.23724	2.45437	2.8744	2.45437	0.19211
2.48505	0.20974	2.48505	1.85517	2.48505	3.03241	2.48505	0.17447
2.51573	0.22731	2.51573	1.49251	2.51573	3.13216	2.51573	0.16553
2.54641	0.24105	2.54641	1.15812	2.54641	3.16968	2.54641	0.17426
2.57709	0.2486	2.57709	0.859	2.57709	3.14393	2.57709	0.20014
2.60777	0.24913	2.60777	0.60015	2.60777	3.05677	2.60777	0.23448
2.63845	0.24295	2.63845	0.38471	2.63845	2.91273	2.63845	0.26797
2.66913	0.23128	2.66913	0.21503	2.66913	2.71874	2.66913	0.29373
2.69981	0.21603	2.69981	0.1	2.69981	2.48369	2.69981	0.30721
2.73049	0.19961	2.73049	0.08304	2.73049	2.21794	2.73049	0.30581
2.76117	0.18464	2.76117	0.12938	2.76117	1.93276	2.76117	0.28852
2.79185	0.17328	2.79185	0.17154	2.79185	1.63981	2.79185	0.2558
2.82252	0.16656	2.82252	0.20458	2.82252	1.35063	2.82252	0.20943
2.8532	0.16381	2.8532	0.23399	2.8532	1.07623	2.8532	0.15263
2.88388	0.16297	2.88388	0.26471	2.88388	0.82689	2.88388	0.09136
2.91456	0.16145	2.91456	0.29886	2.91456	0.61226	2.91456	0.04903
2.94524	0.15694	2.94524	0.33587	2.94524	0.4418	2.94524	0.08304
2.97592	0.14783	2.97592	0.37391	2.97592	0.32456	2.97592	0.14501
3.0066	0.13335	3.0066	0.4111	3.0066	0.26324	3.0066	0.20508
3.03728	0.11363	3.03728	0.44629	3.03728	0.24227	3.03728	0.25687
3.06796	0.08995	3.06796	0.47918	3.06796	0.23388	3.06796	0.29737
3.09864	0.06592	3.09864	0.51014	3.09864	0.21849	3.09864	0.32493
3.12932	0.05155	3.12932	0.5398	3.12932	0.18879	3.12932	0.33893
3.16	0.06129	3.16	0.56867	3.16	0.14506	3.16	0.33965
3.19068	0.0892	3.19068	0.59679	3.19068	0.09323	3.19068	0.32816
3.22136	0.12282	3.22136	0.62364	3.22136	0.05765	3.22136	0.30625
3.25204	0.15652	3.25204	0.64821	3.25204	0.09144	3.25204	0.27628
3.28272	0.18759	3.28272	0.66926	3.28272	0.15961	3.28272	0.24103
3.3134	0.21442	3.3134	0.6856	3.3134	0.23409	3.3134	0.20375
3.34408	0.23601	3.34408	0.69642	3.34408	0.30902	3.34408	0.16809
3.37476	0.25184	3.37476	0.70142	3.37476	0.38252	3.37476	0.13824
3.40544	0.26187	3.40544	0.70099	3.40544	0.4539	3.40544	0.11854
3.43612	0.26648	3.43612	0.69623	3.43612	0.52281	3.43612	0.11145
3.4668	0.26651	3.4668	0.68892	3.4668	0.58882	3.4668	0.11489
3.49748	0.26311	3.49748	0.68148	3.49748	0.65118	3.49748	0.12361
3.52816	0.25773	3.52816	0.67685	3.52816	0.70874	3.52816	0.13299
3.55884	0.25185	3.55884	0.67832	3.55884	0.76004	3.55884	0.14038
3.58952	0.24682	3.58952	0.68925	3.58952	0.80351	3.58952	0.1447
3.62019	0.24355	3.62019	0.71262	3.62019	0.83778	3.62019	0.14584
3.65087	0.24229	3.65087	0.75053	3.65087	0.86197	3.65087	0.14416
3.68155	0.24264	3.68155	0.80383	3.68155	0.87597	3.68155	0.1403
3.71223	0.24366	3.71223	0.87195	3.71223	0.88063	3.71223	0.13492
3.74291	0.24415	3.74291	0.95299	3.74291	0.87787	3.74291	0.12853
3.77359	0.24293	3.77359	1.04404	3.77359	0.87057	3.77359	0.12144
3.80427	0.23905	3.80427	1.14141	3.80427	0.86237	3.80427	0.11365
3.83495	0.23186	3.83495	1.24099	3.83495	0.85703	3.83495	0.10496
3.86563	0.22111	3.86563	1.33846	3.86563	0.85776	3.86563	0.09501
3.89631	0.20689	3.89631	1.42959	3.89631	0.86636	3.89631	0.08349
3.92699	0.18966	3.92699	1.51044	3.92699	0.88272	3.92699	0.07022
3.95767	0.17019	3.95767	1.57759	3.95767	0.90485	3.95767	0.0554
3.98835	0.14954	3.98835	1.6284	3.98835	0.92939	3.98835	0.03988
4.01903	0.12901	4.01903	1.66112	4.01903	0.95239	4.01903	0.02644
4.04971	0.11015	4.04971	1.67507	4.04971	0.97006	4.04971	0.02321
4.08039	0.09468	4.08039	1.67071	4.08039	0.97933	4.08039	0.03365
4.11107	0.08408	4.11107	1.64958	4.11107	0.97823	4.11107	0.04852
4.14175	0.07894	4.14175	1.61429	4.14175	0.96616	4.14175	0.06272
4.17243	0.0783	4.17243	1.56831	4.17243	0.94401	4.17243	0.07416
4.20311	0.08014	4.20311	1.51572	4.20311	0.91432	4.20311	0.08165
4.23379	0.08241	4.23379	1.46086	4.23379	0.88128	4.23379	0.08442
4.26447	0.0837	4.26447	1.40791	4.26447	0.85057	4.26447	0.08206
4.29515	0.08327	4.29515	1.36047	4.29515	0.82885	4.29515	0.07456
4.32583	0.08094	4.32583	1.32118	4.32583	0.82253	4.32583	0.06225
4.35651	0.07693	4.35651	1.29151	4.35651	0.83606	4.35651	0.04593
4.38719	0.07171	4.38719	1.27177	4.38719	0.87041	4.38719	0.02704
4.41786	0.06595	4.41786	1.26138	4.41786	0.92289	4.41786	0.01162
4.44854	0.06035	4.44854	1.25919	4.44854	0.98819	4.44854	0.02309
4.47922	0.05557	4.47922	1.2639	4.47922	1.05997	4.47922	0.04349
4.5099	0.05202	4.5099	1.27422	4.5099	1.13202	4.5099	0.06272
4.54058	0.04977	4.54058	1.28897	4.54058	1.19885	4.54058	0.07875
4.57126	0.0485	4.57126	1.30691	4.57126	1.25594	4.57126	0.0904
4.60194	0.04778	4.60194	1.32663	4.60194	1.29974	4.60194	0.09687
4.63262	0.04722	4.63262	1.34643	4.63262	1.3276	4.63262	0.09777
4.6633	0.04666	4.6633	1.36423	4.6633	1.3377	4.6633	0.09309
4.69398	0.04623	4.69398	1.37767	4.69398	1.32897	4.69398	0.08319
4.72466	0.0463	4.72466	1.38432	4.72466	1.30104	4.72466	0.06878
4.75534	0.0473	4.75534	1.38182	4.75534	1.25414	4.75534	0.05088
4.78602	0.0495	4.78602	1.36819	4.78602	1.18908	4.78602	0.0307
4.8167	0.05286	4.8167	1.342	4.8167	1.10713	4.8167	0.00959
4.84738	0.057	4.84738	1.3025	4.84738	1.01	4.84738	0.01127
4.87806	0.06135	4.87806	1.24972	4.87806	0.8998	4.87806	0.03034
4.90874	0.06529	4.90874	1.18451	4.90874	0.779	4.90874	0.04667
4.93942	0.06826	4.93942	1.10844	4.93942	0.65056	4.93942	0.05941
4.9701	0.06982	4.9701	1.02372	4.9701	0.51814	4.9701	0.06801
5.00078	0.06963	5.00078	0.93309	5.00078	0.38717	5.00078	0.07227
5.03146	0.06752	5.03146	0.8396	5.03146	0.26842	5.03146	0.07234
5.06214	0.06346	5.06214	0.74644	5.06214	0.19106	5.06214	0.0687
5.09282	0.05752	5.09282	0.65672	5.09282	0.2048	5.09282	0.06218
5.1235	0.04991	5.1235	0.57327	5.1235	0.29039	5.1235	0.05387
5.15418	0.04098	5.15418	0.49839	5.15418	0.39664	5.15418	0.04519
5.18486	0.03119	5.18486	0.43365	5.18486	0.50279	5.18486	0.03778
5.21553	0.02137	5.21553	0.37968	5.21553	0.60124	5.21553	0.03322
5.24621	0.01363	5.24621	0.33609	5.24621	0.6882	5.24621	0.03202
5.27689	0.01344	5.27689	0.30162	5.27689	0.76138	5.27689	0.033
5.30757	0.02065	5.30757	0.27447	5.30757	0.81922	5.30757	0.03428
5.33825	0.02967	5.33825	0.25284	5.33825	0.86073	5.33825	0.03451
5.36893	0.03847	5.36893	0.23521	5.36893	0.88535	5.36893	0.0331
5.39961	0.04643	5.39961	0.22056	5.39961	0.89298	5.39961	0.03006
5.43029	0.05328	5.43029	0.20818	5.43029	0.88391	5.43029	0.02592
5.46097	0.05891	5.46097	0.1975	5.46097	0.85887	5.46097	0.02174
5.49165	0.06328	5.49165	0.18785	5.49165	0.81895	5.49165	0.01917
5.52233	0.06641	5.52233	0.17844	5.52233	0.76562	5.52233	0.0196
5.55301	0.06833	5.55301	0.16849	5.55301	0.70065	5.55301	0.02265
5.58369	0.06907	5.58369	0.15746	5.58369	0.6261	5.58369	0.02669
5.61437	0.06864	5.61437	0.14534	5.61437	0.54422	5.61437	0.03044
5.64505	0.06704	5.64505	0.13299	5.64505	0.45739	5.64505	0.03323
5.67573	0.06423	5.67573	0.12241	5.67573	0.36804	5.67573	0.03484
5.70641	0.06016	5.70641	0.11664	5.70641	0.27857	5.70641	0.03536
5.73709	0.0548	5.73709	0.11862	5.73709	0.19128	5.73709	0.03509
5.76777	0.04813	5.76777	0.12917	5.76777	0.10831	5.76777	0.03442
5.79845	0.04015	5.79845	0.1463	5.79845	0.03191	5.79845	0.03372
5.82913	0.03095	5.82913	0.16664	5.82913	0.03895	5.82913	0.03322
5.85981	0.02067	5.85981	0.18694	5.85981	0.09911	5.85981	0.0329
5.89049	0.00965	5.89049	0.20453	5.89049	0.15	5.89049	0.03254
5.92117	0.00435	5.92117	0.21734	5.92117	0.19093	5.92117	0.03184
5.95185	0.01576	5.95185	0.22387	5.95185	0.22183	5.95185	0.03054
5.98253	0.02824	5.98253	0.22309	5.98253	0.24299	5.98253	0.02856
6.0132	0.04062	6.0132	0.2145	6.0132	0.25503	6.0132	0.02597
6.04388	0.05251	6.04388	0.19812	6.04388	0.25879	6.04388	0.02309
6.07456	0.06359	6.07456	0.17456	6.07456	0.25534	6.07456	0.0204
6.10524	0.07358	6.10524	0.14528	6.10524	0.24586	6.10524	0.01849
6.13592	0.08226	6.13592	0.11332	6.13592	0.2316	6.13592	0.01772
6.1666	0.08948	6.1666	0.08581	6.1666	0.21386	6.1666	0.01797
6.19728	0.09517	6.19728	0.07809	6.19728	0.19388	6.19728	0.01866
6.22796	0.09932	6.22796	0.09993	6.22796	0.1729	6.22796	0.01921
6.25864	0.10205	6.25864	0.139	6.25864	0.1521	6.25864	0.01929
6.28932	0.10352	6.28932	0.18352	6.28932	0.13269	6.28932	0.0189
6.32	0.104	6.32	0.22793	6.32	0.11591	6.32	0.0184
6.35068	0.10379	6.35068	0.26922	6.35068	0.10309	6.35068	0.01843
6.38136	0.10322	6.38136	0.30534	6.38136	0.09545	6.38136	0.01959
6.41204	0.10261	6.41204	0.33479	6.41204	0.09367	6.41204	0.022
6.44272	0.10223	6.44272	0.35644	6.44272	0.09746	6.44272	0.02523
6.4734	0.10224	6.4734	0.3695	6.4734	0.1057	6.4734	0.02858
6.50408	0.1027	6.50408	0.37351	6.50408	0.11706	6.50408	0.03145
6.53476	0.10354	6.53476	0.36831	6.53476	0.13044	6.53476	0.03333
6.56544	0.10458	6.56544	0.35406	6.56544	0.14504	6.56544	0.0339
6.59612	0.10561	6.59612	0.33122	6.59612	0.16029	6.59612	0.03299
6.6268	0.10636	6.6268	0.3005	6.6268	0.17576	6.6268	0.03059
6.65748	0.10662	6.65748	0.26292	6.65748	0.19104	6.65748	0.02686
6.68816	0.10619	6.68816	0.21984	6.68816	0.20574	6.68816	0.02206
6.71884	0.10493	6.71884	0.17314	6.71884	0.21947	6.71884	0.0166
6.74952	0.10279	6.74952	0.12593	6.74952	0.23184	6.74952	0.01101
6.7802	0.09974	6.7802	0.08559	6.7802	0.24247	6.7802	0.00623
6.81087	0.09583	6.81087	0.07197	6.81087	0.25105	6.81087	0.00474
6.84155	0.09115	6.84155	0.0981	6.84155	0.25732	6.84155	0.00714
6.87223	0.08583	6.87223	0.14238	6.87223	0.26116	6.87223	0.0098
6.90291	0.08002	6.90291	0.19033	6.90291	0.26255	6.90291	0.01158
6.93359	0.07391	6.93359	0.23707	6.93359	0.26162	6.93359	0.01244
6.96427	0.06767	6.96427	0.28046	6.96427	0.25865	6.96427	0.01287
6.99495	0.06149	6.99495	0.31933	6.99495	0.25404	6.99495	0.01377
7.02563	0.05554	7.02563	0.35292	7.02563	0.24831	7.02563	0.01607
7.05631	0.04998	7.05631	0.38081	7.05631	0.24206	7.05631	0.01999
7.08699	0.04495	7.08699	0.40277	7.08699	0.23592	7.08699	0.02507
7.11767	0.04056	7.11767	0.41878	7.11767	0.23052	7.11767	0.03065
7.14835	0.03687	7.14835	0.42896	7.14835	0.22639	7.14835	0.03613
7.17903	0.0339	7.17903	0.43355	7.17903	0.22394	7.17903	0.04101
7.20971	0.03165	7.20971	0.43291	7.20971	0.22341	7.20971	0.0449
7.24039	0.03004	7.24039	0.42742	7.24039	0.22484	7.24039	0.04756
7.27107	0.02899	7.27107	0.41757	7.27107	0.22809	7.27107	0.04885
7.30175	0.02837	7.30175	0.40382	7.30175	0.23282	7.30175	0.04875
7.33243	0.02809	7.33243	0.38668	7.33243	0.23859	7.33243	0.04738
7.36311	0.02805	7.36311	0.36666	7.36311	0.24479	7.36311	0.04495
7.39379	0.02815	7.39379	0.34428	7.39379	0.25076	7.39379	0.04174
7.42447	0.02833	7.42447	0.32006	7.42447	0.25579	7.42447	0.0381
7.45515	0.02853	7.45515	0.29452	7.45515	0.25911	7.45515	0.03438
7.48583	0.02873	7.48583	0.26821	7.48583	0.26002	7.48583	0.0309
7.51651	0.02889	7.51651	0.24166	7.51651	0.25782	7.51651	0.0279
7.54719	0.02901	7.54719	0.21543	7.54719	0.25196	7.54719	0.02548
7.57787	0.0291	7.57787	0.19004	7.57787	0.24199	7.57787	0.02367
7.60854	0.02917	7.60854	0.16598	7.60854	0.22763	7.60854	0.0224
7.63922	0.02925	7.63922	0.14371	7.63922	0.20881	7.63922	0.02163
7.6699	0.02936	7.6699	0.12359	7.6699	0.18563	7.6699	0.0214
7.70058	0.0295	7.70058	0.10586	7.70058	0.15844	7.70058	0.02179
7.73126	0.02967	7.73126	0.09065	7.73126	0.1278	7.73126	0.02287
7.76194	0.02984	7.76194	0.07795	7.76194	0.09458	7.76194	0.02454
7.79262	0.02997	7.79262	0.06768	7.79262	0.06032	7.79262	0.02661
7.8233	0.02999	7.8233	0.05981	7.8233	0.03047	7.8233	0.0288
7.85398	0.02985	7.85398	0.05448	7.85398	0.03295	7.85398	0.0308
7.88466	0.02948	7.88466	0.05208	7.88466	0.06407	7.88466	0.03235
7.91534	0.02882	7.91534	0.05307	7.91534	0.09851	7.91534	0.03326
7.94602	0.02785	7.94602	0.05764	7.94602	0.13178	7.94602	0.0334
7.9767	0.02653	7.9767	0.06545	7.9767	0.16247	7.9767	0.03273
8.00738	0.02488	8.00738	0.07584	8.00738	0.18975	8.00738	0.03131
8.03806	0.02292	8.03806	0.0881	8.03806	0.21304	8.03806	0.02927
8.06874	0.02069	8.06874	0.10156	8.06874	0.23196	8.06874	0.02678
8.09942	0.01824	8.09942	0.11567	8.09942	0.24629	8.09942	0.02411
8.1301	0.01565	8.1301	0.12997	8.1301	0.25598	8.1301	0.02152
8.16078	0.013	8.16078	0.14405	8.16078	0.26113	8.16078	0.01927
8.19146	0.0104	8.19146	0.15759	8.19146	0.26198	8.19146	0.01756
8.22214	0.00803	8.22214	0.17029	8.22214	0.25894	8.22214	0.01644
8.25282	0.00625	8.25282	0.18192	8.25282	0.25253	8.25282	0.01583
8.2835	0.00572	8.2835	0.1923	8.2835	0.24337	8.2835	0.01555
8.31418	0.00682	8.31418	0.20125	8.31418	0.2322	8.31418	0.01544
8.34486	0.00903	8.34486	0.20865	8.34486	0.21976	8.34486	0.01543
8.37554	0.01182	8.37554	0.21441	8.37554	0.2068	8.37554	0.01555
8.40621	0.01494	8.40621	0.21846	8.40621	0.19398	8.40621	0.01589
8.43689	0.01827	8.43689	0.22075	8.43689	0.18175	8.43689	0.01651
8.46757	0.02171	8.46757	0.22126	8.46757	0.17035	8.46757	0.01739
8.49825	0.0252	8.49825	0.21999	8.49825	0.15968	8.49825	0.01839
8.52893	0.02864	8.52893	0.21696	8.52893	0.14939	8.52893	0.0193
8.55961	0.03193	8.55961	0.21218	8.55961	0.13898	8.55961	0.01987
8.59029	0.03498	8.59029	0.20568	8.59029	0.12791	8.59029	0.01987
8.62097	0.03769	8.62097	0.19751	8.62097	0.11578	8.62097	0.01912
8.65165	0.03999	8.65165	0.18769	8.65165	0.10252	8.65165	0.01751
8.68233	0.04183	8.68233	0.17629	8.68233	0.08853	8.68233	0.01499
8.71301	0.0432	8.71301	0.16335	8.71301	0.07502	8.71301	0.01166
8.74369	0.04411	8.74369	0.14895	8.74369	0.06435	8.74369	0.00792
8.77437	0.04463	8.77437	0.1332	8.77437	0.05996	8.77437	0.00558
8.80505	0.04487	8.80505	0.11626	8.80505	0.06408	8.80505	0.00809
8.83573	0.04498	8.83573	0.09835	8.83573	0.07511	8.83573	0.01356
8.86641	0.04514	8.86641	0.0798	8.86641	0.08942	8.86641	0.01986
8.89709	0.04551	8.89709	0.06114	8.89709	0.10401	8.89709	0.02631
8.92777	0.04623	8.92777	0.04342	8.92777	0.11684	8.92777	0.03256
8.95845	0.04737	8.95845	0.02941	8.95845	0.12656	8.95845	0.03833
8.98913	0.04893	8.98913	0.02599	8.98913	0.13227	8.98913	0.04342
9.01981	0.05082	9.01981	0.03539	9.01981	0.13342	9.01981	0.04769
9.05049	0.05291	9.05049	0.04973	9.05049	0.1298	9.05049	0.05102
9.08117	0.05503	9.08117	0.06449	9.08117	0.1215	9.08117	0.05339
9.11185	0.057	9.11185	0.0781	9.11185	0.10892	9.11185	0.05484
9.14253	0.05868	9.14253	0.0898	9.14253	0.09277	9.14253	0.05547
9.17321	0.05995	9.17321	0.09917	9.17321	0.07415	9.17321	0.05545
9.20388	0.06074	9.20388	0.10592	9.20388	0.05484	9.20388	0.05498
9.23456	0.06102	9.23456	0.10991	9.23456	0.03837	9.23456	0.05433
9.26524	0.06079	9.26524	0.11108	9.26524	0.03245	9.26524	0.05374
9.29592	0.06012	9.29592	0.10951	9.29592	0.04127	9.29592	0.05345
9.3266	0.05907	9.3266	0.10538	9.3266	0.05649	9.3266	0.05362
9.35728	0.05776	9.35728	0.09897	9.35728	0.07176	9.35728	0.05433
9.38796	0.05628	9.38796	0.09069	9.38796	0.0846	9.38796	0.05556
9.41864	0.05475	9.41864	0.0811	9.41864	0.09389	9.41864	0.05719
9.44932	0.05324	9.44932	0.07096	9.44932	0.0991	9.44932	0.05908
9.48	0.0518	9.48	0.06127	9.48	0.10008	9.48	0.06103
9.51068	0.05044	9.51068	0.05347	9.51068	0.09697	9.51068	0.06288
9.54136	0.04913	9.54136	0.04923	9.54136	0.09017	9.54136	0.06445
9.57204	0.04782	9.57204	0.04968	9.57204	0.0803	9.57204	0.06564
9.60272	0.04643	9.60272	0.05445	9.60272	0.06823	9.60272	0.06632
9.6334	0.04489	9.6334	0.06201	9.6334	0.05503	9.6334	0.06644
9.66408	0.04311	9.66408	0.07078	9.66408	0.04224	9.66408	0.06594
9.69476	0.04105	9.69476	0.07962	9.69476	0.03233	9.69476	0.06482
9.72544	0.03869	9.72544	0.08784	9.72544	0.0288	9.72544	0.06308
9.75612	0.03601	9.75612	0.09502	9.75612	0.03273	9.75612	0.06078
9.7868	0.03305	9.7868	0.10093	9.7868	0.04061	9.7868	0.058
9.81748	0.02984	9.81748	0.10547	9.81748	0.04922	9.81748	0.05487
9.84816	0.02646	9.84816	0.10862	9.84816	0.05718	9.84816	0.05155
9.87884	0.02297	9.87884	0.11043	9.87884	0.06408	9.87884	0.04825
9.90952	0.01945	9.90952	0.11103	9.90952	0.06998	9.90952	0.04519
9.9402	0.01599	9.9402	0.11054	9.9402	0.07518	9.9402	0.04263
9.97088	0.01266	9.97088	0.10913	9.97088	0.08001	9.97088	0.04075

## Sheet: Figure 1j
Ni/POM@MOF		Ni-POM
R	FT((k2χ (k)) (Å-3)	R	FT((k2χ (k)) (Å-3)
0	0.23128	0	0.15035
0.03068	0.23195	0.03068	0.1511
0.06136	0.23378	0.06136	0.15304
0.09204	0.23631	0.09204	0.15541
0.12272	0.23892	0.12272	0.15735
0.1534	0.24109	0.1534	0.15828
0.18408	0.24258	0.18408	0.15812
0.21476	0.24359	0.21476	0.1574
0.24544	0.24482	0.24544	0.15714
0.27612	0.24749	0.27612	0.15845
0.3068	0.25308	0.3068	0.16197
0.33748	0.26297	0.33748	0.16749
0.36816	0.27801	0.36816	0.17386
0.39884	0.29815	0.39884	0.17945
0.42951	0.32249	0.42951	0.18277
0.46019	0.34948	0.46019	0.18313
0.49087	0.37728	0.49087	0.18132
0.52155	0.40403	0.52155	0.18019
0.55223	0.42811	0.55223	0.18478
0.58291	0.44828	0.58291	0.2007
0.61359	0.46381	0.61359	0.23098
0.64427	0.47455	0.64427	0.27445
0.67495	0.48108	0.67495	0.32719
0.70563	0.48465	0.70563	0.38459
0.73631	0.48717	0.73631	0.44236
0.76699	0.49098	0.76699	0.4969
0.79767	0.49843	0.79767	0.54551
0.82835	0.51137	0.82835	0.58655
0.85903	0.53058	0.85903	0.61961
0.88971	0.55561	0.88971	0.64551
0.92039	0.58484	0.92039	0.66623
0.95107	0.61599	0.95107	0.68454
0.98175	0.64658	0.98175	0.70337
1.01243	0.67447	1.01243	0.72503
1.04311	0.69822	1.04311	0.75053
1.07379	0.71745	1.07379	0.77937
1.10447	0.73305	1.10447	0.80984
1.13515	0.7473	1.13515	0.83982
1.16583	0.7638	1.16583	0.86774
1.19651	0.78699	1.19651	0.89345
1.22718	0.82132	1.22718	0.91877
1.25786	0.87011	1.25786	0.94752
1.28854	0.93454	1.28854	0.98487
1.31922	1.01339	1.31922	1.03582
1.3499	1.10332	1.3499	1.10335
1.38058	1.19962	1.38058	1.18707
1.41126	1.29693	1.41126	1.28294
1.44194	1.3898	1.44194	1.38406
1.47262	1.47306	1.47262	1.48197
1.5033	1.54207	1.5033	1.56787
1.53398	1.59289	1.53398	1.63359
1.56466	1.62241	1.56466	1.67224
1.59534	1.62845	1.59534	1.67874
1.62602	1.60979	1.62602	1.65006
1.6567	1.56623	1.6567	1.5854
1.68738	1.49853	1.68738	1.48621
1.71806	1.40843	1.71806	1.35609
1.74874	1.29856	1.74874	1.20055
1.77942	1.17233	1.77942	1.02674
1.8101	1.03386	1.8101	0.84313
1.84078	0.88788	1.84078	0.65939
1.87146	0.73972	1.87146	0.48664
1.90214	0.59542	1.90214	0.33938
1.93282	0.46231	1.93282	0.24013
1.9635	0.35025	1.9635	0.21343
1.99418	0.27333	1.99418	0.24139
2.02485	0.24517	2.02485	0.27858
2.05553	0.26013	2.05553	0.30129
2.08621	0.2939	2.08621	0.30279
2.11689	0.3268	2.11689	0.28371
2.14757	0.34932	2.14757	0.24853
2.17825	0.35797	2.17825	0.20476
2.20893	0.35238	2.20893	0.16364
2.23961	0.334	2.23961	0.1404
2.27029	0.30559	2.27029	0.1449
2.30097	0.27104	2.30097	0.1678
2.33165	0.23537	2.33165	0.19282
2.36233	0.20481	2.36233	0.20994
2.39301	0.18594	2.39301	0.21503
2.42369	0.18261	2.42369	0.20798
2.45437	0.1927	2.45437	0.19211
2.48505	0.20974	2.48505	0.17447
2.51573	0.22731	2.51573	0.16553
2.54641	0.24105	2.54641	0.17426
2.57709	0.2486	2.57709	0.20014
2.60777	0.24913	2.60777	0.23448
2.63845	0.24295	2.63845	0.26797
2.66913	0.23128	2.66913	0.29373
2.69981	0.21603	2.69981	0.30721
2.73049	0.19961	2.73049	0.30581
2.76117	0.18464	2.76117	0.28852
2.79185	0.17328	2.79185	0.2558
2.82252	0.16656	2.82252	0.20943
2.8532	0.16381	2.8532	0.15263
2.88388	0.16297	2.88388	0.09136
2.91456	0.16145	2.91456	0.04903
2.94524	0.15694	2.94524	0.08304
2.97592	0.14783	2.97592	0.14501
3.0066	0.13335	3.0066	0.20508
3.03728	0.11363	3.03728	0.25687
3.06796	0.08995	3.06796	0.29737
3.09864	0.06592	3.09864	0.32493
3.12932	0.05155	3.12932	0.33893
3.16	0.06129	3.16	0.33965
3.19068	0.0892	3.19068	0.32816
3.22136	0.12282	3.22136	0.30625
3.25204	0.15652	3.25204	0.27628
3.28272	0.18759	3.28272	0.24103
3.3134	0.21442	3.3134	0.20375
3.34408	0.23601	3.34408	0.16809
3.37476	0.25184	3.37476	0.13824
3.40544	0.26187	3.40544	0.11854
3.43612	0.26648	3.43612	0.11145
3.4668	0.26651	3.4668	0.11489
3.49748	0.26311	3.49748	0.12361
3.52816	0.25773	3.52816	0.13299
3.55884	0.25185	3.55884	0.14038
3.58952	0.24682	3.58952	0.1447
3.62019	0.24355	3.62019	0.14584
3.65087	0.24229	3.65087	0.14416
3.68155	0.24264	3.68155	0.1403
3.71223	0.24366	3.71223	0.13492
3.74291	0.24415	3.74291	0.12853
3.77359	0.24293	3.77359	0.12144
3.80427	0.23905	3.80427	0.11365
3.83495	0.23186	3.83495	0.10496
3.86563	0.22111	3.86563	0.09501
3.89631	0.20689	3.89631	0.08349
3.92699	0.18966	3.92699	0.07022
3.95767	0.17019	3.95767	0.0554
3.98835	0.14954	3.98835	0.03988
4.01903	0.12901	4.01903	0.02644
4.04971	0.11015	4.04971	0.02321
4.08039	0.09468	4.08039	0.03365
4.11107	0.08408	4.11107	0.04852
4.14175	0.07894	4.14175	0.06272
4.17243	0.0783	4.17243	0.07416
4.20311	0.08014	4.20311	0.08165
4.23379	0.08241	4.23379	0.08442
4.26447	0.0837	4.26447	0.08206
4.29515	0.08327	4.29515	0.07456
4.32583	0.08094	4.32583	0.06225
4.35651	0.07693	4.35651	0.04593
4.38719	0.07171	4.38719	0.02704
4.41786	0.06595	4.41786	0.01162
4.44854	0.06035	4.44854	0.02309
4.47922	0.05557	4.47922	0.04349
4.5099	0.05202	4.5099	0.06272
4.54058	0.04977	4.54058	0.07875
4.57126	0.0485	4.57126	0.0904
4.60194	0.04778	4.60194	0.09687
4.63262	0.04722	4.63262	0.09777
4.6633	0.04666	4.6633	0.09309
4.69398	0.04623	4.69398	0.08319
4.72466	0.0463	4.72466	0.06878
4.75534	0.0473	4.75534	0.05088
4.78602	0.0495	4.78602	0.0307
4.8167	0.05286	4.8167	0.00959
4.84738	0.057	4.84738	0.01127
4.87806	0.06135	4.87806	0.03034
4.90874	0.06529	4.90874	0.04667
4.93942	0.06826	4.93942	0.05941
4.9701	0.06982	4.9701	0.06801
5.00078	0.06963	5.00078	0.07227
5.03146	0.06752	5.03146	0.07234
5.06214	0.06346	5.06214	0.0687
5.09282	0.05752	5.09282	0.06218
5.1235	0.04991	5.1235	0.05387
5.15418	0.04098	5.15418	0.04519
5.18486	0.03119	5.18486	0.03778
5.21553	0.02137	5.21553	0.03322
5.24621	0.01363	5.24621	0.03202
5.27689	0.01344	5.27689	0.033
5.30757	0.02065	5.30757	0.03428
5.33825	0.02967	5.33825	0.03451
5.36893	0.03847	5.36893	0.0331
5.39961	0.04643	5.39961	0.03006
5.43029	0.05328	5.43029	0.02592
5.46097	0.05891	5.46097	0.02174
5.49165	0.06328	5.49165	0.01917
5.52233	0.06641	5.52233	0.0196
5.55301	0.06833	5.55301	0.02265
5.58369	0.06907	5.58369	0.02669
5.61437	0.06864	5.61437	0.03044
5.64505	0.06704	5.64505	0.03323
5.67573	0.06423	5.67573	0.03484
5.70641	0.06016	5.70641	0.03536
5.73709	0.0548	5.73709	0.03509
5.76777	0.04813	5.76777	0.03442
5.79845	0.04015	5.79845	0.03372
5.82913	0.03095	5.82913	0.03322
5.85981	0.02067	5.85981	0.0329
5.89049	0.00965	5.89049	0.03254
5.92117	0.00435	5.92117	0.03184
5.95185	0.01576	5.95185	0.03054
5.98253	0.02824	5.98253	0.02856
6.0132	0.04062	6.0132	0.02597
6.04388	0.05251	6.04388	0.02309
6.07456	0.06359	6.07456	0.0204
6.10524	0.07358	6.10524	0.01849
6.13592	0.08226	6.13592	0.01772
6.1666	0.08948	6.1666	0.01797
6.19728	0.09517	6.19728	0.01866
6.22796	0.09932	6.22796	0.01921
6.25864	0.10205	6.25864	0.01929
6.28932	0.10352	6.28932	0.0189
6.32	0.104	6.32	0.0184
6.35068	0.10379	6.35068	0.01843
6.38136	0.10322	6.38136	0.01959
6.41204	0.10261	6.41204	0.022
6.44272	0.10223	6.44272	0.02523
6.4734	0.10224	6.4734	0.02858
6.50408	0.1027	6.50408	0.03145
6.53476	0.10354	6.53476	0.03333
6.56544	0.10458	6.56544	0.0339
6.59612	0.10561	6.59612	0.03299
6.6268	0.10636	6.6268	0.03059
6.65748	0.10662	6.65748	0.02686
6.68816	0.10619	6.68816	0.02206
6.71884	0.10493	6.71884	0.0166
6.74952	0.10279	6.74952	0.01101
6.7802	0.09974	6.7802	0.00623
6.81087	0.09583	6.81087	0.00474
6.84155	0.09115	6.84155	0.00714
6.87223	0.08583	6.87223	0.0098
6.90291	0.08002	6.90291	0.01158
6.93359	0.07391	6.93359	0.01244
6.96427	0.06767	6.96427	0.01287
6.99495	0.06149	6.99495	0.01377
7.02563	0.05554	7.02563	0.01607
7.05631	0.04998	7.05631	0.01999
7.08699	0.04495	7.08699	0.02507
7.11767	0.04056	7.11767	0.03065
7.14835	0.03687	7.14835	0.03613
7.17903	0.0339	7.17903	0.04101
7.20971	0.03165	7.20971	0.0449
7.24039	0.03004	7.24039	0.04756
7.27107	0.02899	7.27107	0.04885
7.30175	0.02837	7.30175	0.04875
7.33243	0.02809	7.33243	0.04738
7.36311	0.02805	7.36311	0.04495
7.39379	0.02815	7.39379	0.04174
7.42447	0.02833	7.42447	0.0381
7.45515	0.02853	7.45515	0.03438
7.48583	0.02873	7.48583	0.0309
7.51651	0.02889	7.51651	0.0279
7.54719	0.02901	7.54719	0.02548
7.57787	0.0291	7.57787	0.02367
7.60854	0.02917	7.60854	0.0224
7.63922	0.02925	7.63922	0.02163
7.6699	0.02936	7.6699	0.0214
7.70058	0.0295	7.70058	0.02179
7.73126	0.02967	7.73126	0.02287
7.76194	0.02984	7.76194	0.02454
7.79262	0.02997	7.79262	0.02661
7.8233	0.02999	7.8233	0.0288
7.85398	0.02985	7.85398	0.0308
7.88466	0.02948	7.88466	0.03235
7.91534	0.02882	7.91534	0.03326
7.94602	0.02785	7.94602	0.0334
7.9767	0.02653	7.9767	0.03273
8.00738	0.02488	8.00738	0.03131
8.03806	0.02292	8.03806	0.02927
8.06874	0.02069	8.06874	0.02678
8.09942	0.01824	8.09942	0.02411
8.1301	0.01565	8.1301	0.02152
8.16078	0.013	8.16078	0.01927
8.19146	0.0104	8.19146	0.01756
8.22214	0.00803	8.22214	0.01644
8.25282	0.00625	8.25282	0.01583
8.2835	0.00572	8.2835	0.01555
8.31418	0.00682	8.31418	0.01544
8.34486	0.00903	8.34486	0.01543
8.37554	0.01182	8.37554	0.01555
8.40621	0.01494	8.40621	0.01589
8.43689	0.01827	8.43689	0.01651
8.46757	0.02171	8.46757	0.01739
8.49825	0.0252	8.49825	0.01839
8.52893	0.02864	8.52893	0.0193
8.55961	0.03193	8.55961	0.01987
8.59029	0.03498	8.59029	0.01987
8.62097	0.03769	8.62097	0.01912
8.65165	0.03999	8.65165	0.01751
8.68233	0.04183	8.68233	0.01499
8.71301	0.0432	8.71301	0.01166
8.74369	0.04411	8.74369	0.00792
8.77437	0.04463	8.77437	0.00558
8.80505	0.04487	8.80505	0.00809
8.83573	0.04498	8.83573	0.01356
8.86641	0.04514	8.86641	0.01986
8.89709	0.04551	8.89709	0.02631
8.92777	0.04623	8.92777	0.03256
8.95845	0.04737	8.95845	0.03833
8.98913	0.04893	8.98913	0.04342
9.01981	0.05082	9.01981	0.04769
9.05049	0.05291	9.05049	0.05102
9.08117	0.05503	9.08117	0.05339
9.11185	0.057	9.11185	0.05484
9.14253	0.05868	9.14253	0.05547
9.17321	0.05995	9.17321	0.05545
9.20388	0.06074	9.20388	0.05498
9.23456	0.06102	9.23456	0.05433
9.26524	0.06079	9.26524	0.05374
9.29592	0.06012	9.29592	0.05345
9.3266	0.05907	9.3266	0.05362
9.35728	0.05776	9.35728	0.05433
9.38796	0.05628	9.38796	0.05556
9.41864	0.05475	9.41864	0.05719
9.44932	0.05324	9.44932	0.05908
9.48	0.0518	9.48	0.06103
9.51068	0.05044	9.51068	0.06288
9.54136	0.04913	9.54136	0.06445
9.57204	0.04782	9.57204	0.06564
9.60272	0.04643	9.60272	0.06632
9.6334	0.04489	9.6334	0.06644
9.66408	0.04311	9.66408	0.06594
9.69476	0.04105	9.69476	0.06482
9.72544	0.03869	9.72544	0.06308
9.75612	0.03601	9.75612	0.06078
9.7868	0.03305	9.7868	0.058
9.81748	0.02984	9.81748	0.05487
9.84816	0.02646	9.84816	0.05155
9.87884	0.02297	9.87884	0.04825
9.90952	0.01945	9.90952	0.04519
9.9402	0.01599	9.9402	0.04263
9.97088	0.01266	9.97088	0.04075

## Sheet: Figure 1k
R	chir_mag	fit	residual	running	window
0	0.26832	0.22157	0.04675	0	0
0.03068	0.26569	0.22019	0.0456	0	0
0.06136	0.25813	0.21626	0.04222	0	0
0.09204	0.2466	0.21041	0.0368	0	0
0.12272	0.2328	0.20366	0.02975	0	0
0.1534	0.21924	0.19736	0.02204	0	0
0.18408	0.20916	0.19307	0.01651	0	0
0.21476	0.20595	0.1922	0.0188	0	0
0.24544	0.212	0.19562	0.0285	0	0
0.27612	0.2275	0.20336	0.04122	0	0
0.3068	0.25052	0.21458	0.05498	0	0
0.33748	0.27811	0.22792	0.06891	0	0
0.36816	0.30732	0.24182	0.08247	0	0
0.39884	0.33571	0.25487	0.09525	0	0
0.42951	0.36142	0.26592	0.10692	0	0
0.46019	0.38318	0.27424	0.11725	0	0
0.49087	0.40033	0.27959	0.12605	0	0
0.52155	0.41276	0.28222	0.13321	0	0
0.55223	0.42096	0.28299	0.13873	0	0
0.58291	0.42601	0.28335	0.14266	0	0
0.61359	0.42952	0.28528	0.14514	0	0
0.64427	0.43347	0.29093	0.14637	0	0
0.67495	0.43995	0.30224	0.14662	0	0
0.70563	0.45073	0.32028	0.14619	0	0
0.73631	0.46689	0.34502	0.14539	0	0
0.76699	0.48846	0.37538	0.14449	0	0
0.79767	0.51451	0.40958	0.14373	0	0
0.82835	0.54329	0.44563	0.14323	0	0
0.85903	0.57271	0.48159	0.143	0	0
0.88971	0.60062	0.51583	0.14294	0	0
0.92039	0.62515	0.54716	0.14286	0	0
0.95107	0.64497	0.57499	0.1425	0	0
0.98175	0.65945	0.59936	0.14157	0	0
1.01243	0.66888	0.6211	0.1398	0.08144	1
1.04311	0.67463	0.64181	0.13695	0.15959	1
1.07379	0.67918	0.6638	0.13284	0.23311	1
1.10447	0.68615	0.68983	0.12736	0.30069	1
1.13515	0.69986	0.72275	0.12049	0.36118	1
1.16583	0.72462	0.7649	0.11228	0.41371	1
1.19651	0.76371	0.81764	0.1029	0.45783	1
1.22718	0.81851	0.88104	0.09257	0.49354	1
1.25786	0.88819	0.9539	0.0816	0.52128	1
1.28854	0.97006	1.03399	0.07039	0.54192	1
1.31922	1.06026	1.11836	0.05945	0.55664	1
1.3499	1.15437	1.20373	0.0494	0.56681	1
1.38058	1.24791	1.28667	0.04101	0.57382	1
1.41126	1.33659	1.36385	0.03513	0.57896	1
1.44194	1.41651	1.43216	0.03228	0.5833	1
1.47262	1.48418	1.48881	0.03209	0.5876	1
1.5033	1.5367	1.53144	0.03338	0.59224	1
1.53398	1.57172	1.55815	0.03485	0.5973	1
1.56466	1.58753	1.56755	0.03558	0.60257	1
1.59534	1.58308	1.55882	0.03503	0.60769	1
1.62602	1.55799	1.53173	0.03295	0.61221	1
1.6567	1.51252	1.48659	0.02931	0.61579	1
1.68738	1.44762	1.42429	0.02432	0.61825	1
1.71806	1.36481	1.34625	0.01856	0.61969	1
1.74874	1.26619	1.25439	0.01374	0.62048	1
1.77942	1.15436	1.15106	0.01378	0.62127	1
1.8101	1.03234	1.03903	0.01997	0.62293	1
1.84078	0.90354	0.92138	0.02901	0.62644	1
1.87146	0.77172	0.80154	0.03892	0.63275	1
1.90214	0.64103	0.68326	0.04882	0.64268	1
1.93282	0.5162	0.57074	0.05817	0.65678	1
1.9635	0.40307	0.4688	0.06656	0.67524	1
1.99418	0.3098	0.38317	0.07367	0.69785	1
2.02485	0.24786	0.3203	0.07924	0.72402	1
2.05553	0.22716	0.28516	0.08309	0.75279	1
2.08621	0.24189	0.27658	0.08511	0.78297	1
2.11689	0.2728	0.28583	0.08526	0.81326	1
2.14757	0.30423	0.30191	0.08359	0.84237	1
2.17825	0.32823	0.31662	0.08023	0.8692	1
2.20893	0.34146	0.32532	0.07541	0.89289	1
2.23961	0.34308	0.32596	0.06945	0.91299	1
2.27029	0.33362	0.31814	0.06281	0.92943	1
2.30097	0.31454	0.30258	0.05608	0.94254	1
2.33165	0.28805	0.28079	0.05007	0.95298	1
2.36233	0.25704	0.25491	0.04572	0.96169	1
2.39301	0.22517	0.22768	0.04393	0.96974	1
2.42369	0.19696	0.20233	0.04503	0.97818	1
2.45437	0.17743	0.18239	0.04858	0.98802	1
2.48505	0.17046	0.17079	0.05363	1	1
2.51573	0.17609	0.16853	0.05925	1	0
2.54641	0.19032	0.17389	0.06468	1	0
2.57709	0.2079	0.18341	0.06941	1	0
2.60777	0.22459	0.19358	0.07307	1	0
2.63845	0.23766	0.20176	0.07541	1	0
2.66913	0.24554	0.20625	0.07626	1	0
2.69981	0.24754	0.20621	0.07553	1	0
2.73049	0.2436	0.20143	0.07316	1	0
2.76117	0.23411	0.19222	0.06912	1	0
2.79185	0.21984	0.17931	0.06344	1	0
2.82252	0.20182	0.16381	0.05615	1	0
2.8532	0.18126	0.14716	0.04732	1	0
2.88388	0.15952	0.13109	0.03707	1	0
2.91456	0.13805	0.11756	0.02561	1	0
2.94524	0.11836	0.10834	0.01366	1	0
2.97592	0.10195	0.10437	0.00819	1	0
3.0066	0.09012	0.10518	0.01973	1	0
3.03728	0.08367	0.10905	0.03507	1	0
3.06796	0.08248	0.11392	0.05141	1	0
3.09864	0.08566	0.11805	0.06822	1	0
3.12932	0.09218	0.12029	0.08515	1	0
3.16	0.10135	0.12	0.10192	1	0
3.19068	0.11287	0.11701	0.11824	1	0
3.22136	0.1266	0.11149	0.13382	1	0
3.25204	0.14233	0.1039	0.14841	1	0
3.28272	0.15969	0.09498	0.16177	1	0
3.3134	0.1781	0.08569	0.17368	1	0
3.34408	0.19684	0.07722	0.18399	1	0
3.37476	0.21515	0.07078	0.19257	1	0
3.40544	0.23225	0.06729	0.19937	1	0
3.43612	0.24745	0.06695	0.20436	1	0
3.4668	0.26014	0.06903	0.20761	1	0
3.49748	0.26989	0.07231	0.2092	1	0
3.52816	0.27641	0.07559	0.20927	1	0
3.55884	0.27958	0.07796	0.208	1	0
3.58952	0.27946	0.07886	0.20557	1	0
3.62019	0.27627	0.07801	0.20217	1	0
3.65087	0.27036	0.0754	0.19799	1	0
3.68155	0.26219	0.07123	0.19315	1	0
3.71223	0.25228	0.06587	0.18778	1	0
3.74291	0.24118	0.05987	0.18192	1	0
3.77359	0.22942	0.05392	0.17559	1	0
3.80427	0.21744	0.04879	0.16875	1	0
3.83495	0.20557	0.04524	0.16136	1	0
3.86563	0.19399	0.04371	0.15335	1	0
3.89631	0.18275	0.04408	0.14466	1	0
3.92699	0.17178	0.04572	0.13527	1	0
3.95767	0.16091	0.04781	0.1252	1	0
3.98835	0.14997	0.04963	0.11453	1	0
4.01903	0.13884	0.05069	0.10339	1	0
4.04971	0.12748	0.05069	0.092	1	0
4.08039	0.11599	0.04954	0.08067	1	0
4.11107	0.10461	0.04731	0.06978	1	0
4.14175	0.09377	0.04417	0.05983	1	0
4.17243	0.08403	0.04045	0.05142	1	0
4.20311	0.07604	0.03654	0.04519	1	0
4.23379	0.07038	0.03295	0.04159	1	0
4.26447	0.0673	0.03021	0.04052	1	0
4.29515	0.06655	0.02872	0.04129	1	0
4.32583	0.06739	0.02856	0.04289	1	0
4.35651	0.06889	0.02943	0.04447	1	0
4.38719	0.07018	0.03082	0.0454	1	0
4.41786	0.07063	0.03219	0.04532	1	0
4.44854	0.06982	0.03316	0.04404	1	0
4.47922	0.06756	0.03348	0.04155	1	0
4.5099	0.06387	0.03304	0.03792	1	0
4.54058	0.05895	0.03182	0.03336	1	0
4.57126	0.05321	0.02991	0.0282	1	0
4.60194	0.04728	0.02745	0.02302	1	0
4.63262	0.04207	0.02465	0.01881	1	0
4.6633	0.03869	0.02181	0.0171	1	0
4.69398	0.03814	0.01925	0.01891	1	0
4.72466	0.04057	0.01732	0.02336	1	0
4.75534	0.04521	0.01628	0.02897	1	0
4.78602	0.05092	0.01615	0.03478	1	0
4.8167	0.05675	0.01668	0.04026	1	0
4.84738	0.06201	0.0175	0.04509	1	0
4.87806	0.06626	0.01826	0.04909	1	0
4.90874	0.06919	0.01874	0.05211	1	0
4.93942	0.07063	0.01879	0.05407	1	0
4.9701	0.07048	0.01837	0.05492	1	0
5.00078	0.06874	0.01751	0.05465	1	0
5.03146	0.06544	0.01627	0.05327	1	0
5.06214	0.06068	0.01475	0.05081	1	0
5.09282	0.05458	0.0131	0.04732	1	0
5.1235	0.04732	0.0115	0.04291	1	0
5.15418	0.03909	0.01014	0.03774	1	0
5.18486	0.03019	0.00918	0.03204	1	0
5.21553	0.02108	0.00874	0.02628	1	0
5.24621	0.0131	0.00873	0.02133	1	0
5.27689	0.01099	0.00899	0.01884	1	0
5.30757	0.01738	0.00931	0.02036	1	0
5.33825	0.02658	0.00952	0.02543	1	0
5.36893	0.03612	0.00953	0.03237	1	0
5.39961	0.04529	0.00929	0.03998	1	0
5.43029	0.05369	0.00881	0.04754	1	0
5.46097	0.06107	0.00811	0.0546	1	0
5.49165	0.06717	0.00724	0.06081	1	0
5.52233	0.07182	0.00627	0.06589	1	0
5.55301	0.07485	0.0053	0.0696	1	0
5.58369	0.07614	0.00442	0.07175	1	0
5.61437	0.07561	0.00377	0.07221	1	0
5.64505	0.07323	0.00343	0.07088	1	0
5.67573	0.06902	0.0034	0.06772	1	0
5.70641	0.06304	0.00358	0.06276	1	0
5.73709	0.05542	0.00382	0.05606	1	0
5.76777	0.04631	0.004	0.04776	1	0
5.79845	0.03594	0.00407	0.03804	1	0
5.82913	0.02454	0.00402	0.02712	1	0
5.85981	0.01241	0.00384	0.01529	1	0
5.89049	0.00090022	0.00356	0.00295	1	0
5.92117	0.01298	0.0032	0.01007	1	0
5.95185	0.02554	0.00278	0.02284	1	0
5.98253	0.03765	0.00236	0.03529	1	0
6.0132	0.04903	0.00197	0.04712	1	0
6.04388	0.05944	0.00163	0.05803	1	0
6.07456	0.06868	0.00138	0.06779	1	0
6.10524	0.07658	0.00121	0.07621	1	0
6.13592	0.08307	0.00112	0.08315	1	0
6.1666	0.0881	0.00106	0.08855	1	0
6.19728	0.09171	0.001	0.0924	1	0
6.22796	0.09397	0.000918236	0.09478	1	0
6.25864	0.09505	0.000805302	0.09585	1	0
6.28932	0.09517	0.000666731	0.09582	1	0
6.32	0.09457	0.000513379	0.095	1	0
6.35068	0.09355	0.000364855	0.09371	1	0
6.38136	0.09241	0.000263437	0.09232	1	0
6.41204	0.09145	0.000277848	0.09118	1	0
6.44272	0.09089	0.000392943	0.09056	1	0
6.4734	0.09088	0.00054571	0.09065	1	0
6.50408	0.09147	0.000712123	0.09148	1	0
6.53476	0.09258	0.000886152	0.09294	1	0
6.56544	0.09408	0.00107	0.09483	1	0
6.59612	0.09575	0.00124	0.09686	1	0
6.6268	0.09736	0.00142	0.09876	1	0
6.65748	0.0987	0.00158	0.10026	1	0
6.68816	0.09957	0.00171	0.10113	1	0
6.71884	0.09982	0.00181	0.10122	1	0
6.74952	0.09935	0.00186	0.10044	1	0
6.7802	0.09811	0.00186	0.09876	1	0
6.81087	0.09606	0.00181	0.09621	1	0
6.84155	0.09325	0.00173	0.09287	1	0
6.87223	0.08975	0.00162	0.08888	1	0
6.90291	0.08563	0.00152	0.08439	1	0
6.93359	0.08104	0.00147	0.07959	1	0
6.96427	0.07612	0.00151	0.07467	1	0
6.99495	0.07101	0.00166	0.06982	1	0
7.02563	0.0659	0.00188	0.06521	1	0
7.05631	0.06094	0.00216	0.06095	1	0
7.08699	0.0563	0.00243	0.05715	1	0
7.11767	0.05212	0.00269	0.05382	1	0
7.14835	0.0485	0.0029	0.05094	1	0
7.17903	0.04549	0.00305	0.04844	1	0
7.20971	0.04308	0.00313	0.04621	1	0
7.24039	0.04122	0.00314	0.04416	1	0
7.27107	0.03978	0.00309	0.0422	1	0
7.30175	0.03863	0.00297	0.04027	1	0
7.33243	0.03764	0.00281	0.03835	1	0
7.36311	0.03667	0.00263	0.03645	1	0
7.39379	0.03566	0.00245	0.03459	1	0
7.42447	0.03453	0.0023	0.03283	1	0
7.45515	0.03326	0.00219	0.0312	1	0
7.48583	0.03187	0.00212	0.02975	1	0
7.51651	0.03037	0.00209	0.02848	1	0
7.54719	0.02882	0.00208	0.0274	1	0
7.57787	0.02725	0.00206	0.02645	1	0
7.60854	0.02573	0.002	0.02559	1	0
7.63922	0.02428	0.00191	0.02474	1	0
7.6699	0.02293	0.00176	0.02386	1	0
7.70058	0.02169	0.00156	0.02288	1	0
7.73126	0.02056	0.00132	0.0218	1	0
7.76194	0.01951	0.00108	0.02059	1	0
7.79262	0.01853	0.000914512	0.01928	1	0
7.8233	0.01759	0.000901712	0.0179	1	0
7.85398	0.0167	0.00107	0.0165	1	0
7.88466	0.01586	0.00135	0.01514	1	0
7.91534	0.01511	0.00167	0.01389	1	0
7.94602	0.01448	0.00198	0.01283	1	0
7.9767	0.01404	0.00224	0.01204	1	0
8.00738	0.01384	0.00245	0.01156	1	0
8.03806	0.01391	0.00259	0.01143	1	0
8.06874	0.01425	0.00265	0.01166	1	0
8.09942	0.01484	0.00264	0.01221	1	0
8.1301	0.01562	0.00256	0.01306	1	0
8.16078	0.01656	0.00242	0.01416	1	0
8.19146	0.0176	0.00222	0.01548	1	0
8.22214	0.01873	0.00198	0.01699	1	0
8.25282	0.01993	0.00173	0.01864	1	0
8.2835	0.0212	0.00148	0.02041	1	0
8.31418	0.02253	0.00125	0.02225	1	0
8.34486	0.02394	0.00107	0.02411	1	0
8.37554	0.0254	0.000957214	0.02594	1	0
8.40621	0.0269	0.000916959	0.0277	1	0
8.43689	0.02841	0.000926434	0.02933	1	0
8.46757	0.02987	0.000954375	0.0308	1	0
8.49825	0.03124	0.000974749	0.03206	1	0
8.52893	0.03245	0.000971894	0.03308	1	0
8.55961	0.03346	0.000939142	0.03384	1	0
8.59029	0.0342	0.000876344	0.03432	1	0
8.62097	0.03464	0.000788026	0.03453	1	0
8.65165	0.03477	0.00068227	0.03447	1	0
8.68233	0.03459	0.000570288	0.03417	1	0
8.71301	0.03412	0.000466633	0.03367	1	0
8.74369	0.03341	0.000389077	0.03303	1	0
8.77437	0.03256	0.000353336	0.03231	1	0
8.80505	0.03166	0.000359375	0.03161	1	0
8.83573	0.03087	0.000388593	0.03101	1	0
8.86641	0.0303	0.000420357	0.03062	1	0
8.89709	0.03008	0.000442082	0.03051	1	0
8.92777	0.03029	0.000448765	0.03073	1	0
8.95845	0.03095	0.000440682	0.03131	1	0
8.98913	0.032	0.00042187	0.03222	1	0
9.01981	0.03336	0.000399095	0.03339	1	0
9.05049	0.03488	0.000380478	0.03473	1	0
9.08117	0.03643	0.000372989	0.03614	1	0
9.11185	0.03789	0.000379234	0.03752	1	0
9.14253	0.03917	0.000396134	0.03878	1	0
9.17321	0.04019	0.000417021	0.03985	1	0
9.20388	0.0409	0.0004349	0.04067	1	0
9.23456	0.04129	0.000444497	0.0412	1	0
9.26524	0.04137	0.00044295	0.04143	1	0
9.29592	0.04118	0.000429895	0.04138	1	0
9.3266	0.04076	0.000407394	0.04107	1	0
9.35728	0.04019	0.000379845	0.04056	1	0
9.38796	0.03955	0.000353691	0.0399	1	0
9.41864	0.03892	0.000336371	0.03919	1	0
9.44932	0.03837	0.000333792	0.0385	1	0
9.48	0.03795	0.000347277	0.03792	1	0
9.51068	0.0377	0.000373087	0.03749	1	0
9.54136	0.03761	0.000405223	0.03726	1	0
9.57204	0.03766	0.000438455	0.03722	1	0
9.60272	0.03781	0.000469712	0.03736	1	0
9.6334	0.03799	0.000498239	0.03761	1	0
9.66408	0.03814	0.000525191	0.0379	1	0
9.69476	0.03819	0.00055289	0.03814	1	0
9.72544	0.0381	0.000583844	0.03827	1	0
9.75612	0.03783	0.000619726	0.03821	1	0
9.7868	0.03736	0.000660657	0.03791	1	0
9.81748	0.03667	0.000705071	0.03735	1	0
9.84816	0.03577	0.000750144	0.03651	1	0
9.87884	0.03468	0.000792507	0.0354	1	0
9.90952	0.03342	0.000828976	0.03405	1	0
9.9402	0.03204	0.000857131	0.03248	1	0
9.97088	0.03056	0.000875716	0.03076	1	0

## Sheet: Figure 1l
R	chir_mag	fit	residual	running	window
0	0.15035	0.20249	0.05214	0	0
0.03068	0.1511	0.20237	0.05141	0	0
0.06136	0.15304	0.20204	0.04944	0	0
0.09204	0.15541	0.20157	0.04677	0	0
0.12272	0.15735	0.20115	0.0443	0	0
0.1534	0.15828	0.20108	0.04305	0	0
0.18408	0.15812	0.20177	0.04373	0	0
0.21476	0.1574	0.20369	0.04632	0	0
0.24544	0.15714	0.20722	0.05012	0	0
0.27612	0.15845	0.21246	0.05423	0	0
0.3068	0.16197	0.2192	0.05792	0	0
0.33748	0.16749	0.22685	0.06087	0	0
0.36816	0.17386	0.23466	0.06322	0	0
0.39884	0.17945	0.24185	0.06557	0	0
0.42951	0.18277	0.24787	0.0689	0	0
0.46019	0.18313	0.25264	0.07423	0	0
0.49087	0.18132	0.25663	0.08223	0	0
0.52155	0.18019	0.2609	0.09291	0	0
0.55223	0.18478	0.26692	0.1057	0	0
0.58291	0.2007	0.27617	0.11971	0	0
0.61359	0.23098	0.28968	0.13396	0	0
0.64427	0.27445	0.30754	0.14751	0	0
0.67495	0.32719	0.32893	0.15956	0	0
0.70563	0.38459	0.35235	0.16947	0	0
0.73631	0.44236	0.37617	0.17675	0	0
0.76699	0.4969	0.39905	0.1811	0	0
0.79767	0.54551	0.42033	0.18241	0	0
0.82835	0.58655	0.44023	0.18073	0	0
0.85903	0.61961	0.45988	0.17625	0	0
0.88971	0.64551	0.48111	0.16933	0	0
0.92039	0.66623	0.50595	0.16045	0	0
0.95107	0.68454	0.53599	0.1502	0	0
0.98175	0.70337	0.57182	0.13926	0	0
1.01243	0.72503	0.61277	0.12838	0.06514	1
1.04311	0.75053	0.65711	0.11831	0.12046	1
1.07379	0.77937	0.70264	0.10974	0.16805	1
1.10447	0.80984	0.74728	0.10311	0.21006	1
1.13515	0.83982	0.78977	0.09854	0.24844	1
1.16583	0.86774	0.83008	0.09576	0.28468	1
1.19651	0.89345	0.86975	0.09417	0.31973	1
1.22718	0.91877	0.9117	0.09304	0.35394	1
1.25786	0.94752	0.95974	0.09171	0.38718	1
1.28854	0.98487	1.01754	0.08971	0.41898	1
1.31922	1.03582	1.0874	0.0868	0.44876	1
1.3499	1.10335	1.16934	0.08302	0.476	1
1.38058	1.18707	1.26073	0.07857	0.5004	1
1.41126	1.28294	1.35671	0.07386	0.52196	1
1.44194	1.38406	1.45088	0.06929	0.54093	1
1.47262	1.48197	1.5362	0.06522	0.55774	1
1.5033	1.56787	1.60577	0.06183	0.57285	1
1.53398	1.63359	1.65342	0.05901	0.58661	1
1.56466	1.67224	1.67416	0.05647	0.59922	1
1.59534	1.67874	1.66454	0.05384	0.61067	1
1.62602	1.65006	1.62285	0.05082	0.62088	1
1.6567	1.5854	1.54921	0.04737	0.62975	1
1.68738	1.48621	1.44558	0.04375	0.63731	1
1.71806	1.35609	1.31562	0.04049	0.64379	1
1.74874	1.20055	1.16455	0.03831	0.64959	1
1.77942	1.02674	0.99889	0.03766	0.6552	1
1.8101	0.84313	0.82631	0.0384	0.66102	1
1.84078	0.65939	0.65552	0.03975	0.66727	1
1.87146	0.48664	0.4968	0.04068	0.67381	1
1.90214	0.33938	0.36352	0.04029	0.68022	1
1.93282	0.24013	0.27466	0.03804	0.68594	1
1.9635	0.21343	0.24715	0.03392	0.69049	1
1.99418	0.24139	0.26777	0.02886	0.69378	1
2.02485	0.27858	0.3023	0.02547	0.69634	1
2.05553	0.30129	0.32888	0.02779	0.6994	1
2.08621	0.30279	0.33935	0.03663	0.7047	1
2.11689	0.28371	0.33255	0.04905	0.7142	1
2.14757	0.24853	0.31085	0.06234	0.72956	1
2.17825	0.20476	0.27884	0.07468	0.75161	1
2.20893	0.16364	0.2427	0.08468	0.77994	1
2.23961	0.1404	0.20979	0.09128	0.81287	1
2.27029	0.1449	0.18744	0.09378	0.84763	1
2.30097	0.1678	0.17962	0.09184	0.88096	1
2.33165	0.19282	0.18383	0.08568	0.90997	1
2.36233	0.20994	0.19309	0.07632	0.93299	1
2.39301	0.21503	0.20087	0.06605	0.95024	1
2.42369	0.20798	0.20335	0.05921	0.96409	1
2.45437	0.19211	0.19931	0.06115	0.97887	1
2.48505	0.17447	0.18958	0.07312	1	1
2.51573	0.16553	0.17655	0.09121	1	0
2.54641	0.17426	0.16356	0.11096	1	0
2.57709	0.20014	0.1541	0.1292	1	0
2.60777	0.23448	0.15036	0.14379	1	0
2.63845	0.26797	0.15203	0.15321	1	0
2.66913	0.29373	0.15655	0.15658	1	0
2.69981	0.30721	0.16067	0.1536	1	0
2.73049	0.30581	0.16176	0.14474	1	0
2.76117	0.28852	0.15835	0.13146	1	0
2.79185	0.2558	0.15019	0.11668	1	0
2.82252	0.20943	0.1381	0.10546	1	0
2.8532	0.15263	0.12386	0.10432	1	0
2.88388	0.09136	0.11008	0.11679	1	0
2.91456	0.04903	0.09969	0.14013	1	0
2.94524	0.08304	0.09488	0.16888	1	0
2.97592	0.14501	0.0956	0.19844	1	0
3.0066	0.20508	0.09954	0.22556	1	0
3.03728	0.25687	0.10373	0.24797	1	0
3.06796	0.29737	0.10588	0.26408	1	0
3.09864	0.32493	0.1048	0.27289	1	0
3.12932	0.33893	0.10031	0.27389	1	0
3.16	0.33965	0.09308	0.26706	1	0
3.19068	0.32816	0.0845	0.25279	1	0
3.22136	0.30625	0.07646	0.23185	1	0
3.25204	0.27628	0.07096	0.20535	1	0
3.28272	0.24103	0.06916	0.17465	1	0
3.3134	0.20375	0.07063	0.14136	1	0
3.34408	0.16809	0.07366	0.10731	1	0
3.37476	0.13824	0.07632	0.07483	1	0
3.40544	0.11854	0.07723	0.04791	1	0
3.43612	0.11145	0.07576	0.03591	1	0
3.4668	0.11489	0.07192	0.04471	1	0
3.49748	0.12361	0.06634	0.06096	1	0
3.52816	0.13299	0.06011	0.07581	1	0
3.55884	0.14038	0.05467	0.08678	1	0
3.58952	0.1447	0.05137	0.09335	1	0
3.62019	0.14584	0.05082	0.0957	1	0
3.65087	0.14416	0.05238	0.0945	1	0
3.68155	0.1403	0.05472	0.09065	1	0
3.71223	0.13492	0.0565	0.08524	1	0
3.74291	0.12853	0.05686	0.07937	1	0
3.77359	0.12144	0.05545	0.07391	1	0
3.80427	0.11365	0.05238	0.06931	1	0
3.83495	0.10496	0.04818	0.06545	1	0
3.86563	0.09501	0.04367	0.06173	1	0
3.89631	0.08349	0.03988	0.05734	1	0
3.92699	0.07022	0.03765	0.0516	1	0
3.95767	0.0554	0.03724	0.04412	1	0
3.98835	0.03988	0.03813	0.03499	1	0
4.01903	0.02644	0.03936	0.02501	1	0
4.04971	0.02321	0.04008	0.01688	1	0
4.08039	0.03365	0.03977	0.01719	1	0
4.11107	0.04852	0.03828	0.02589	1	0
4.14175	0.06272	0.0358	0.03643	1	0
4.17243	0.07416	0.03277	0.04586	1	0
4.20311	0.08165	0.02988	0.05285	1	0
4.23379	0.08442	0.02783	0.0566	1	0
4.26447	0.08206	0.02706	0.05669	1	0
4.29515	0.07456	0.02748	0.05299	1	0
4.32583	0.06225	0.0285	0.04576	1	0
4.35651	0.04593	0.02943	0.03573	1	0
4.38719	0.02704	0.02977	0.02465	1	0
4.41786	0.01162	0.02925	0.01785	1	0
4.44854	0.02309	0.02786	0.02358	1	0
4.47922	0.04349	0.02583	0.03655	1	0
4.5099	0.06272	0.02353	0.05031	1	0
4.54058	0.07875	0.02146	0.06245	1	0
4.57126	0.0904	0.02007	0.07171	1	0
4.60194	0.09687	0.01958	0.0773	1	0
4.63262	0.09777	0.01979	0.07878	1	0
4.6633	0.09309	0.02027	0.07602	1	0
4.69398	0.08319	0.02056	0.0692	1	0
4.72466	0.06878	0.02033	0.05882	1	0
4.75534	0.05088	0.01945	0.04568	1	0
4.78602	0.0307	0.01797	0.03105	1	0
4.8167	0.00959	0.01607	0.01758	1	0
4.84738	0.01127	0.01407	0.01481	1	0
4.87806	0.03034	0.01239	0.02553	1	0
4.90874	0.04667	0.01141	0.038	1	0
4.93942	0.05941	0.01128	0.04862	1	0
4.9701	0.06801	0.01172	0.0563	1	0
5.00078	0.07227	0.01231	0.06061	1	0
5.03146	0.07234	0.01267	0.06147	1	0
5.06214	0.0687	0.0126	0.05915	1	0
5.09282	0.06218	0.01203	0.05422	1	0
5.1235	0.05387	0.01102	0.04752	1	0
5.15418	0.04519	0.00972	0.04024	1	0
5.18486	0.03778	0.00836	0.03392	1	0
5.21553	0.03322	0.00723	0.03019	1	0
5.24621	0.03202	0.00659	0.02981	1	0
5.27689	0.033	0.00652	0.03182	1	0
5.30757	0.03428	0.0068	0.0344	1	0
5.33825	0.03451	0.00713	0.03613	1	0
5.36893	0.0331	0.00728	0.03631	1	0
5.39961	0.03006	0.00714	0.03474	1	0
5.43029	0.02592	0.00668	0.03166	1	0
5.46097	0.02174	0.00596	0.02765	1	0
5.49165	0.01917	0.00506	0.02376	1	0
5.52233	0.0196	0.00413	0.02135	1	0
5.55301	0.02265	0.00334	0.02155	1	0
5.58369	0.02669	0.00287	0.02412	1	0
5.61437	0.03044	0.00277	0.02777	1	0
5.64505	0.03323	0.0029	0.03137	1	0
5.67573	0.03484	0.00304	0.03422	1	0
5.70641	0.03536	0.00307	0.03604	1	0
5.73709	0.03509	0.00293	0.03681	1	0
5.76777	0.03442	0.00263	0.03669	1	0
5.79845	0.03372	0.00222	0.03594	1	0
5.82913	0.03322	0.00177	0.03482	1	0
5.85981	0.0329	0.00136	0.03355	1	0
5.89049	0.03254	0.00113	0.03225	1	0
5.92117	0.03184	0.00111	0.03088	1	0
5.95185	0.03054	0.00121	0.02935	1	0
5.98253	0.02856	0.00129	0.02756	1	0
6.0132	0.02597	0.0013	0.0255	1	0
6.04388	0.02309	0.00121	0.02326	1	0
6.07456	0.0204	0.00104	0.02108	1	0
6.10524	0.01849	0.000818967	0.0193	1	0
6.13592	0.01772	0.000607055	0.01821	1	0
6.1666	0.01797	0.000493279	0.0179	1	0
6.19728	0.01866	0.000541037	0.01816	1	0
6.22796	0.01921	0.000678384	0.01861	1	0
6.25864	0.01929	0.000819346	0.01897	1	0
6.28932	0.0189	0.000931686	0.01911	1	0
6.32	0.0184	0.00101	0.01917	1	0
6.35068	0.01843	0.00108	0.01951	1	0
6.38136	0.01959	0.00114	0.02049	1	0
6.41204	0.022	0.00121	0.0223	1	0
6.44272	0.02523	0.00129	0.02479	1	0
6.4734	0.02858	0.00138	0.02752	1	0
6.50408	0.03145	0.00147	0.03001	1	0
6.53476	0.03333	0.00157	0.03179	1	0
6.56544	0.0339	0.00166	0.03253	1	0
6.59612	0.03299	0.00175	0.03198	1	0
6.6268	0.03059	0.00184	0.03009	1	0
6.65748	0.02686	0.00192	0.0269	1	0
6.68816	0.02206	0.00198	0.02262	1	0
6.71884	0.0166	0.00201	0.01758	1	0
6.74952	0.01101	0.00201	0.01222	1	0
6.7802	0.00623	0.00197	0.00728	1	0
6.81087	0.00474	0.0019	0.00462	1	0
6.84155	0.00714	0.00182	0.00624	1	0
6.87223	0.0098	0.00175	0.00896	1	0
6.90291	0.01158	0.00172	0.01099	1	0
6.93359	0.01244	0.00175	0.01212	1	0
6.96427	0.01287	0.00184	0.0127	1	0
6.99495	0.01377	0.00197	0.01361	1	0
7.02563	0.01607	0.00211	0.01584	1	0
7.05631	0.01999	0.00225	0.01979	1	0
7.08699	0.02507	0.00237	0.02509	1	0
7.11767	0.03065	0.00248	0.03107	1	0
7.14835	0.03613	0.00259	0.03708	1	0
7.17903	0.04101	0.0027	0.04255	1	0
7.20971	0.0449	0.00283	0.04705	1	0
7.24039	0.04756	0.00296	0.05023	1	0
7.27107	0.04885	0.0031	0.05189	1	0
7.30175	0.04875	0.00322	0.05196	1	0
7.33243	0.04738	0.0033	0.05051	1	0
7.36311	0.04495	0.00332	0.04773	1	0
7.39379	0.04174	0.00329	0.0439	1	0
7.42447	0.0381	0.0032	0.03942	1	0
7.45515	0.03438	0.00306	0.03472	1	0
7.48583	0.0309	0.00289	0.03025	1	0
7.51651	0.0279	0.00271	0.02638	1	0
7.54719	0.02548	0.00254	0.02338	1	0
7.57787	0.02367	0.00238	0.02135	1	0
7.60854	0.0224	0.00225	0.02017	1	0
7.63922	0.02163	0.00211	0.01969	1	0
7.6699	0.0214	0.00196	0.01983	1	0
7.70058	0.02179	0.00177	0.02062	1	0
7.73126	0.02287	0.00154	0.02208	1	0
7.76194	0.02454	0.00129	0.02416	1	0
7.79262	0.02661	0.00104	0.02666	1	0
7.8233	0.0288	0.000896324	0.02927	1	0
7.85398	0.0308	0.000937621	0.03165	1	0
7.88466	0.03235	0.00115	0.0335	1	0
7.91534	0.03326	0.00144	0.03458	1	0
7.94602	0.0334	0.00172	0.03473	1	0
7.9767	0.03273	0.00195	0.0339	1	0
8.00738	0.03131	0.00211	0.03214	1	0
8.03806	0.02927	0.00219	0.0296	1	0
8.06874	0.02678	0.0022	0.02651	1	0
8.09942	0.02411	0.00213	0.02321	1	0
8.1301	0.02152	0.00203	0.02007	1	0
8.16078	0.01927	0.0019	0.01748	1	0
8.19146	0.01756	0.00179	0.01578	1	0
8.22214	0.01644	0.0017	0.01502	1	0
8.25282	0.01583	0.00164	0.01499	1	0
8.2835	0.01555	0.00161	0.0153	1	0
8.31418	0.01544	0.00158	0.01568	1	0
8.34486	0.01543	0.00153	0.01601	1	0
8.37554	0.01555	0.00144	0.01632	1	0
8.40621	0.01589	0.00132	0.01674	1	0
8.43689	0.01651	0.00117	0.01737	1	0
8.46757	0.01739	0.000991828	0.01822	1	0
8.49825	0.01839	0.000815579	0.01915	1	0
8.52893	0.0193	0.000670974	0.01997	1	0
8.55961	0.01987	0.000593121	0.02041	1	0
8.59029	0.01987	0.000594824	0.02026	1	0
8.62097	0.01912	0.000647313	0.01932	1	0
8.65165	0.01751	0.000708604	0.01749	1	0
8.68233	0.01499	0.00075058	0.01475	1	0
8.71301	0.01166	0.000760371	0.0112	1	0
8.74369	0.00792	0.000735221	0.00726	1	0
8.77437	0.00558	0.000678678	0.00499	1	0
8.80505	0.00809	0.000598122	0.00808	1	0
8.83573	0.01356	0.000502918	0.0138	1	0
8.86641	0.01986	0.000402901	0.02015	1	0
8.89709	0.02631	0.000307126	0.02658	1	0
8.92777	0.03256	0.000222901	0.03277	1	0
8.95845	0.03833	0.000155277	0.03848	1	0
8.98913	0.04342	0.000107326	0.04353	1	0
9.01981	0.04769	8.14284e-05	0.04777	1	0
9.05049	0.05102	7.83863e-05	0.0511	1	0
9.08117	0.05339	9.22821e-05	0.05348	1	0
9.11185	0.05484	0.000113897	0.05496	1	0
9.14253	0.05547	0.000136235	0.0556	1	0
9.17321	0.05545	0.000154259	0.05556	1	0
9.20388	0.05498	0.00016448	0.05506	1	0
9.23456	0.05433	0.000165442	0.05433	1	0
9.26524	0.05374	0.000158645	0.05367	1	0
9.29592	0.05345	0.000149784	0.05332	1	0
9.3266	0.05362	0.000149132	0.05347	1	0
9.35728	0.05433	0.000166615	0.05422	1	0
9.38796	0.05556	0.000203129	0.05555	1	0
9.41864	0.05719	0.000251912	0.05732	1	0
9.44932	0.05908	0.000305788	0.05934	1	0
9.48	0.06103	0.000359896	0.06139	1	0
9.51068	0.06288	0.000411574	0.06326	1	0
9.54136	0.06445	0.000459746	0.06479	1	0
9.57204	0.06564	0.000504255	0.06584	1	0
9.60272	0.06632	0.000545198	0.06633	1	0
9.6334	0.06644	0.000582405	0.06622	1	0
9.66408	0.06594	0.000615223	0.06551	1	0
9.69476	0.06482	0.000642675	0.06422	1	0
9.72544	0.06308	0.000663946	0.06241	1	0
9.75612	0.06078	0.000678995	0.06016	1	0
9.7868	0.058	0.000689075	0.05755	1	0
9.81748	0.05487	0.000696943	0.05469	1	0
9.84816	0.05155	0.000706528	0.0517	1	0
9.87884	0.04825	0.000721979	0.04872	1	0
9.90952	0.04519	0.000746306	0.0459	1	0
9.9402	0.04263	0.000780249	0.0434	1	0
9.97088	0.04075	0.000822025	0.04138	1	0

## Sheet: Figure 1m
k (Å-1)	R+α (Å)
-14.45	0	0.000604306
-14.45	0.02076	0.00121
-14.45	0.04152	0.00162
-14.45	0.06228	0.00182
-14.45	0.08305	0.00188
-14.45	0.10381	0.00189
-14.45	0.12457	0.00193
-14.45	0.14533	0.00208
-14.45	0.16609	0.00234
-14.45	0.18685	0.00265
-14.45	0.20761	0.00295
-14.45	0.22837	0.00318
-14.45	0.24914	0.0033
-14.45	0.2699	0.00331
-14.45	0.29066	0.00322
-14.45	0.31142	0.00309
-14.45	0.33218	0.00297
-14.45	0.35294	0.0029
-14.45	0.3737	0.0029
-14.45	0.39446	0.00296
-14.45	0.41523	0.00302
-14.45	0.43599	0.00306
-14.45	0.45675	0.00304
-14.45	0.47751	0.00294
-14.45	0.49827	0.00277
-14.45	0.51903	0.00253
-14.45	0.53979	0.00224
-14.45	0.56055	0.00192
-14.45	0.58132	0.00161
-14.45	0.60208	0.00134
-14.45	0.62284	0.00114
-14.45	0.6436	0.00104
-14.45	0.66436	0.00104
-14.45	0.68512	0.0011
-14.45	0.70588	0.00119
-14.45	0.72664	0.00126
-14.45	0.74741	0.00131
-14.45	0.76817	0.00133
-14.45	0.78893	0.00132
-14.45	0.80969	0.00128
-14.45	0.83045	0.00122
-14.45	0.85121	0.00115
-14.45	0.87197	0.00106
-14.45	0.89273	0.000967737
-14.45	0.9135	0.000869853
-14.45	0.93426	0.000772174
-14.45	0.95502	0.00067746
-14.45	0.97578	0.000587788
-14.45	0.99654	0.000504607
-14.45	1.0173	0.000428823
-14.45	1.03806	0.000360879
-14.45	1.05882	0.000300854
-14.45	1.07959	0.000248538
-14.45	1.10035	0.000203516
-14.45	1.12111	0.000165228
-14.45	1.14187	0.000133034
-14.45	1.16263	0.000106253
-14.45	1.18339	8.42032e-05
-14.45	1.20415	6.62264e-05
-14.45	1.22491	5.1708e-05
-14.45	1.24568	4.00885e-05
-14.45	1.26644	3.08696e-05
-14.45	1.2872	2.36163e-05
-14.45	1.30796	1.79548e-05
-14.45	1.32872	1.35695e-05
-14.45	1.34948	1.01975e-05
-14.45	1.37024	7.62271e-06
-14.45	1.391	5.66953e-06
-14.45	1.41177	4.19715e-06
-14.45	1.43253	3.09373e-06
-14.45	1.45329	2.27135e-06
-14.45	1.47405	1.66156e-06
-14.45	1.49481	1.21153e-06
-14.45	1.51557	8.8083e-07
-14.45	1.53633	6.38755e-07
-14.45	1.55709	4.62165e-07
-14.45	1.57786	3.33735e-07
-14.45	1.59862	2.40575e-07
-14.45	1.61938	1.7315e-07
-14.45	1.64014	1.24444e-07
-14.45	1.6609	8.9317e-08
-14.45	1.68166	6.40183e-08
-14.45	1.70242	4.58206e-08
-14.45	1.72318	3.27463e-08
-14.45	1.74395	2.33638e-08
-14.45	1.76471	1.66391e-08
-14.45	1.78547	1.1826e-08
-14.45	1.80623	8.38636e-09
-14.45	1.82699	5.93268e-09
-14.45	1.84775	4.18582e-09
-14.45	1.86851	2.94496e-09
-14.45	1.88927	2.06572e-09
-14.45	1.91004	1.4444e-09
-14.45	1.9308	1.00663e-09
-14.45	1.95156	6.99137e-10
-14.45	1.97232	4.83864e-10
-14.45	1.99308	3.33669e-10
-14.45	2.01384	2.29251e-10
-14.45	2.0346	1.56923e-10
-14.45	2.05536	1.07009e-10
-14.45	2.07613	7.26954e-11
-14.45	2.09689	4.91962e-11
-14.45	2.11765	3.31659e-11
-14.45	2.13841	2.22733e-11
-14.45	2.15917	1.49009e-11
-14.45	2.17993	9.93053e-12
-14.45	2.20069	6.59284e-12
-14.45	2.22145	4.36029e-12
-14.45	2.24222	2.87282e-12
-14.45	2.26298	1.88562e-12
-14.45	2.28374	1.233e-12
-14.45	2.3045	8.03236e-13
-14.45	2.32526	5.21311e-13
-14.45	2.34602	3.3708e-13
-14.45	2.36678	2.17149e-13
-14.45	2.38754	1.39373e-13
-14.45	2.4083	8.91257e-14
-14.45	2.42907	5.6785e-14
-14.45	2.44983	3.60477e-14
-14.45	2.47059	2.28003e-14
-14.45	2.49135	1.4369e-14
-14.45	2.51211	9.0228e-15
-14.45	2.53287	5.6453e-15
-14.45	2.55363	3.51941e-15
-14.45	2.57439	2.18621e-15
-14.45	2.59516	1.35318e-15
-14.45	2.61592	8.3458e-16
-14.45	2.63668	5.12894e-16
-14.45	2.65744	3.14079e-16
-14.45	2.6782	1.91648e-16
-14.45	2.69896	1.16527e-16
-14.45	2.71972	7.06001e-17
-14.45	2.74048	4.26231e-17
-14.45	2.76125	2.56417e-17
-14.45	2.78201	1.53714e-17
-14.45	2.80277	9.18215e-18
-14.45	2.82353	5.46566e-18
-14.45	2.84429	3.24197e-18
-14.45	2.86505	1.91622e-18
-14.45	2.88581	1.12864e-18
-14.45	2.90657	6.62421e-19
-14.45	2.92734	3.87425e-19
-14.45	2.9481	2.25797e-19
-14.45	2.96886	1.31136e-19
-14.45	2.98962	7.58935e-20
-14.45	3.01038	4.37689e-20
-14.45	3.03114	2.51539e-20
-14.45	3.0519	1.44054e-20
-14.45	3.07266	8.22104e-21
-14.45	3.09343	4.6753e-21
-14.45	3.11419	2.64957e-21
-14.45	3.13495	1.49632e-21
-14.45	3.15571	8.4209e-22
-14.45	3.17647	4.72255e-22
-14.45	3.19723	2.63925e-22
-14.45	3.21799	1.46984e-22
-14.45	3.23875	8.15728e-23
-14.45	3.25952	4.51136e-23
-14.45	3.28028	2.48632e-23
-14.45	3.30104	1.36551e-23
-14.45	3.3218	7.47342e-24
-14.45	3.34256	4.07598e-24
-14.45	3.36332	2.2153e-24
-14.45	3.38408	1.19983e-24
-14.45	3.40484	6.47586e-25
-14.45	3.42561	3.48307e-25
-14.45	3.44637	1.86687e-25
-14.45	3.46713	9.97137e-26
-14.45	3.48789	5.30741e-26
-14.45	3.50865	2.81513e-26
-14.45	3.52941	1.488e-26
-14.45	3.55017	7.83775e-27
-14.45	3.57093	4.11404e-27
-14.45	3.5917	2.15195e-27
-14.45	3.61246	1.12171e-27
-14.45	3.63322	5.82662e-28
-14.45	3.65398	3.01604e-28
-14.45	3.67474	1.55576e-28
-14.45	3.6955	7.99711e-29
-14.45	3.71626	4.09645e-29
-14.45	3.73702	2.09105e-29
-14.45	3.75779	1.06367e-29
-14.45	3.77855	5.39177e-30
-14.45	3.79931	2.72357e-30
-14.45	3.82007	1.37097e-30
-14.45	3.84083	6.87697e-31
-14.45	3.86159	3.43754e-31
-14.45	3.88235	1.7123e-31
-14.45	3.90311	8.49948e-32
-14.45	3.92388	4.20421e-32
-14.45	3.94464	2.07232e-32
-14.45	3.9654	1.0179e-32
-14.45	3.98616	4.98236e-33
-14.45	4.00692	2.4302e-33
-14.45	4.02768	1.18121e-33
-14.45	4.04844	5.72123e-34
-14.45	4.0692	2.7614e-34
-14.45	4.08997	1.32814e-34
-14.45	4.11073	6.36558e-35
-14.45	4.13149	3.04023e-35
-14.45	4.15225	1.44694e-35
-14.45	4.17301	6.86232e-36
-14.45	4.19377	3.24315e-36
-14.45	4.21453	1.52734e-36
-14.45	4.23529	7.16773e-37
-14.45	4.25606	3.35197e-37
-14.45	4.27682	1.56205e-37
-14.45	4.29758	7.25373e-38
-14.45	4.31834	3.35663e-38
-14.45	4.3391	1.54781e-38
-14.45	4.35986	7.11223e-39
-14.45	4.38062	3.25662e-39
-14.45	4.40138	1.48594e-39
-14.45	4.42215	6.7563e-40
-14.45	4.44291	3.06118e-40
-14.45	4.46367	1.38211e-40
-14.45	4.48443	6.21823e-41
-14.45	4.50519	2.78782e-41
-14.45	4.52595	1.24547e-41
-14.45	4.54671	5.54467e-42
-14.45	4.56747	2.45974e-42
-14.45	4.58824	1.08736e-42
-14.45	4.609	4.78996e-43
-14.45	4.62976	2.10262e-43
-14.45	4.65052	9.19732e-44
-14.45	4.67128	4.00897e-44
-14.45	4.69204	1.74131e-44
-14.45	4.7128	7.53687e-45
-14.45	4.73356	3.2507e-45
-14.45	4.75433	1.39712e-45
-14.45	4.77509	5.98359e-46
-14.45	4.79585	2.55365e-46
-14.45	4.81661	1.086e-46
-14.45	4.83737	4.60226e-47
-14.45	4.85813	1.94349e-47
-14.45	4.87889	8.17833e-48
-14.45	4.89965	3.42939e-48
-14.45	4.92042	1.43298e-48
-14.45	4.94118	5.96669e-49
-14.45	4.96194	2.47569e-49
-14.45	4.9827	1.0236e-49
-14.45	5.00346	4.2173e-50
-14.45	5.02422	1.73145e-50
-14.45	5.04498	7.08359e-51
-14.45	5.06574	2.8878e-51
-14.45	5.08651	1.17314e-51
-14.45	5.10727	4.74902e-52
-14.45	5.12803	1.9157e-52
-14.45	5.14879	7.70051e-53
-14.45	5.16955	3.08447e-53
-14.45	5.19031	1.23115e-53
-14.45	5.21107	4.89679e-54
-14.45	5.23183	1.9408e-54
-14.45	5.2526	7.66511e-55
-14.45	5.27336	3.01665e-55
-14.45	5.29412	1.18304e-55
-14.45	5.31488	4.62321e-56
-14.45	5.33564	1.80035e-56
-14.45	5.3564	6.98612e-57
-14.45	5.37716	2.70137e-57
-14.45	5.39792	1.04088e-57
-14.45	5.41869	3.99654e-58
-14.45	5.43945	1.5291e-58
-14.45	5.46021	5.82982e-59
-14.45	5.48097	2.21484e-59
-14.45	5.50173	8.38485e-60
-14.45	5.52249	3.16312e-60
-14.45	5.54325	1.18906e-60
-14.45	5.56401	4.45407e-61
-14.45	5.58478	1.66256e-61
-14.45	5.60554	6.18392e-62
-14.45	5.6263	2.29201e-62
-14.45	5.64706	8.46515e-63
-14.45	5.66782	3.11544e-63
-14.45	5.68858	1.14253e-63
-14.45	5.70934	4.17527e-64
-14.45	5.7301	1.52042e-64
-14.45	5.75087	5.51709e-65
-14.45	5.77163	1.9949e-65
-14.45	5.79239	7.18779e-66
-14.45	5.81315	2.58068e-66
-14.45	5.83391	9.2329e-67
-14.45	5.85467	3.29159e-67
-14.45	5.87543	1.16933e-67
-14.45	5.89619	4.13935e-68
-14.45	5.91696	1.46012e-68
-14.45	5.93772	5.13229e-69
-14.45	5.95848	1.79761e-69
-14.45	5.97924	6.27398e-70
-14.45	6	2.18199e-70
-14.4	0	0.000604307
-14.4	0.02076	0.00121
-14.4	0.04152	0.00162
-14.4	0.06228	0.00182
-14.4	0.08305	0.00188
-14.4	0.10381	0.00189
-14.4	0.12457	0.00193
-14.4	0.14533	0.00208
-14.4	0.16609	0.00234
-14.4	0.18685	0.00266
-14.4	0.20761	0.00296
-14.4	0.22837	0.00318
-14.4	0.24914	0.0033
-14.4	0.2699	0.00331
-14.4	0.29066	0.00323
-14.4	0.31142	0.0031
-14.4	0.33218	0.00298
-14.4	0.35294	0.00291
-14.4	0.3737	0.00291
-14.4	0.39446	0.00297
-14.4	0.41523	0.00304
-14.4	0.43599	0.00308
-14.4	0.45675	0.00306
-14.4	0.47751	0.00297
-14.4	0.49827	0.00279
-14.4	0.51903	0.00255
-14.4	0.53979	0.00226
-14.4	0.56055	0.00194
-14.4	0.58132	0.00163
-14.4	0.60208	0.00135
-14.4	0.62284	0.00115
-14.4	0.6436	0.00105
-14.4	0.66436	0.00105
-14.4	0.68512	0.00112
-14.4	0.70588	0.0012
-14.4	0.72664	0.00128
-14.4	0.74741	0.00133
-14.4	0.76817	0.00135
-14.4	0.78893	0.00134
-14.4	0.80969	0.00131
-14.4	0.83045	0.00125
-14.4	0.85121	0.00118
-14.4	0.87197	0.00109
-14.4	0.89273	0.000993189
-14.4	0.9135	0.00089391
-14.4	0.93426	0.000794586
-14.4	0.95502	0.000698062
-14.4	0.97578	0.000606488
-14.4	0.99654	0.00052138
-14.4	1.0173	0.000443696
-14.4	1.03806	0.000373926
-14.4	1.05882	0.000312179
-14.4	1.07959	0.00025827
-14.4	1.10035	0.000211796
-14.4	1.12111	0.000172207
-14.4	1.14187	0.000138863
-14.4	1.16263	0.000111078
-14.4	1.18339	8.81627e-05
-14.4	1.20415	6.94485e-05
-14.4	1.22491	5.43089e-05
-14.4	1.24568	4.21715e-05
-14.4	1.26644	3.25254e-05
-14.4	1.2872	2.49229e-05
-14.4	1.30796	1.89787e-05
-14.4	1.32872	1.43667e-05
-14.4	1.34948	1.08142e-05
-14.4	1.37024	8.09685e-06
-14.4	1.391	6.03205e-06
-14.4	1.41177	4.47286e-06
-14.4	1.43253	3.30239e-06
-14.4	1.45329	2.42855e-06
-14.4	1.47405	1.7795e-06
-14.4	1.49481	1.29968e-06
-14.4	1.51557	9.46492e-07
-14.4	1.53633	6.87523e-07
-14.4	1.55709	4.98292e-07
-14.4	1.57786	3.60438e-07
-14.4	1.59862	2.60274e-07
-14.4	1.61938	1.87657e-07
-14.4	1.64014	1.35112e-07
-14.4	1.6609	9.71503e-08
-14.4	1.68166	6.97626e-08
-14.4	1.70242	5.00273e-08
-14.4	1.72318	3.58224e-08
-14.4	1.74395	2.56096e-08
-14.4	1.76471	1.82758e-08
-14.4	1.78547	1.30164e-08
-14.4	1.80623	9.25031e-09
-14.4	1.82699	6.55813e-09
-14.4	1.84775	4.6374e-09
-14.4	1.86851	3.27005e-09
-14.4	1.88927	2.29903e-09
-14.4	1.91004	1.61129e-09
-14.4	1.9308	1.1256e-09
-14.4	1.95156	7.83641e-10
-14.4	1.97232	5.43666e-10
-14.4	1.99308	3.75829e-10
-14.4	2.01384	2.58859e-10
-14.4	2.0346	1.77634e-10
-14.4	2.05536	1.2144e-10
-14.4	2.07613	8.27098e-11
-14.4	2.09689	5.6118e-11
-14.4	2.11765	3.79308e-11
-14.4	2.13841	2.55403e-11
-14.4	2.15917	1.71317e-11
-14.4	2.17993	1.14478e-11
-14.4	2.20069	7.6206e-12
-14.4	2.22145	5.05371e-12
-14.4	2.24222	3.3388e-12
-14.4	2.26298	2.19753e-12
-14.4	2.28374	1.44096e-12
-14.4	2.3045	9.4134e-13
-14.4	2.32526	6.1267e-13
-14.4	2.34602	3.97282e-13
-14.4	2.36678	2.56667e-13
-14.4	2.38754	1.65214e-13
-14.4	2.4083	1.05959e-13
-14.4	2.42907	6.77086e-14
-14.4	2.44983	4.31096e-14
-14.4	2.47059	2.73484e-14
-14.4	2.49135	1.72872e-14
-14.4	2.51211	1.08882e-14
-14.4	2.53287	6.83328e-15
-14.4	2.55363	4.27315e-15
-14.4	2.57439	2.66267e-15
-14.4	2.59516	1.65326e-15
-14.4	2.61592	1.02287e-15
-14.4	2.63668	6.30608e-16
-14.4	2.65744	3.874e-16
-14.4	2.6782	2.37151e-16
-14.4	2.69896	1.44663e-16
-14.4	2.71972	8.79341e-17
-14.4	2.74048	5.32634e-17
-14.4	2.76125	3.21494e-17
-14.4	2.78201	1.93371e-17
-14.4	2.80277	1.15901e-17
-14.4	2.82353	6.92241e-18
-14.4	2.84429	4.12011e-18
-14.4	2.86505	2.44365e-18
-14.4	2.88581	1.44429e-18
-14.4	2.90657	8.50647e-19
-14.4	2.92734	4.99264e-19
-14.4	2.9481	2.92009e-19
-14.4	2.96886	1.70196e-19
-14.4	2.98962	9.88531e-20
-14.4	3.01038	5.72163e-20
-14.4	3.03114	3.30019e-20
-14.4	3.0519	1.89692e-20
-14.4	3.07266	1.08656e-20
-14.4	3.09343	6.20221e-21
-14.4	3.11419	3.52805e-21
-14.4	3.13495	1.99994e-21
-14.4	3.15571	1.12978e-21
-14.4	3.17647	6.36014e-22
-14.4	3.19723	3.56808e-22
-14.4	3.21799	1.9948e-22
-14.4	3.23875	1.11138e-22
-14.4	3.25952	6.17052e-23
-14.4	3.28028	3.41412e-23
-14.4	3.30104	1.8825e-23
-14.4	3.3218	1.0344e-23
-14.4	3.34256	5.66423e-24
-14.4	3.36332	3.09095e-24
-14.4	3.38408	1.6809e-24
-14.4	3.40484	9.10942e-25
-14.4	3.42561	4.9197e-25
-14.4	3.44637	2.6478e-25
-14.4	3.46713	1.42014e-25
-14.4	3.48789	7.59055e-26
-14.4	3.50865	4.04311e-26
-14.4	3.52941	2.14613e-26
-14.4	3.55017	1.13525e-26
-14.4	3.57093	5.98451e-27
-14.4	3.5917	3.14385e-27
-14.4	3.61246	1.64585e-27
-14.4	3.63322	8.58653e-28
-14.4	3.65398	4.46417e-28
-14.4	3.67474	2.31291e-28
-14.4	3.6955	1.19419e-28
-14.4	3.71626	6.14443e-29
-14.4	3.73702	3.15054e-29
-14.4	3.75779	1.60984e-29
-14.4	3.77855	8.19736e-30
-14.4	3.79931	4.15967e-30
-14.4	3.82007	2.10347e-30
-14.4	3.84083	1.06e-30
-14.4	3.86159	5.32314e-31
-14.4	3.88235	2.66392e-31
-14.4	3.90311	1.32851e-31
-14.4	3.92388	6.60238e-32
-14.4	3.94464	3.26983e-32
-14.4	3.9654	1.61376e-32
-14.4	3.98616	7.93678e-33
-14.4	4.00692	3.88989e-33
-14.4	4.02768	1.89985e-33
-14.4	4.04844	9.24677e-34
-14.4	4.0692	4.48485e-34
-14.4	4.08997	2.16767e-34
-14.4	4.11073	1.04406e-34
-14.4	4.13149	5.01125e-35
-14.4	4.15225	2.39691e-35
-14.4	4.17301	1.14247e-35
-14.4	4.19377	5.42654e-36
-14.4	4.21453	2.56855e-36
-14.4	4.23529	1.21154e-36
-14.4	4.25606	5.69471e-37
-14.4	4.27682	2.66742e-37
-14.4	4.29758	1.24508e-37
-14.4	4.31834	5.79142e-38
-14.4	4.3391	2.68447e-38
-14.4	4.35986	1.23999e-38
-14.4	4.38062	5.70766e-39
-14.4	4.40138	2.61808e-39
-14.4	4.42215	1.19672e-39
-14.4	4.44291	5.45111e-40
-14.4	4.46367	2.47435e-40
-14.4	4.48443	1.11923e-40
-14.4	4.50519	5.045e-41
-14.4	4.52595	2.26614e-41
-14.4	4.54671	1.01436e-41
-14.4	4.56747	4.52465e-42
-14.4	4.58824	2.01121e-42
-14.4	4.609	8.90867e-43
-14.4	4.62976	3.93234e-43
-14.4	4.65052	1.7297e-43
-14.4	4.67128	7.58182e-44
-14.4	4.69204	3.31175e-44
-14.4	4.7128	1.44153e-44
-14.4	4.73356	6.25277e-45
-14.4	4.75433	2.70273e-45
-14.4	4.77509	1.16417e-45
-14.4	4.79585	4.99699e-46
-14.4	4.81661	2.13739e-46
-14.4	4.83737	9.11047e-47
-14.4	4.85813	3.86972e-47
-14.4	4.87889	1.63794e-47
-14.4	4.89965	6.90876e-48
-14.4	4.92042	2.9039e-48
-14.4	4.94118	1.21631e-48
-14.4	4.96194	5.0768e-49
-14.4	4.9827	2.11162e-49
-14.4	5.00346	8.75229e-50
-14.4	5.02422	3.615e-50
-14.4	5.04498	1.48791e-50
-14.4	5.06574	6.10273e-51
-14.4	5.08651	2.49433e-51
-14.4	5.10727	1.01593e-51
-14.4	5.12803	4.12337e-52
-14.4	5.14879	1.66771e-52
-14.4	5.16955	6.72158e-53
-14.4	5.19031	2.69961e-53
-14.4	5.21107	1.08046e-53
-14.4	5.23183	4.30923e-54
-14.4	5.2526	1.71265e-54
-14.4	5.27336	6.78293e-55
-14.4	5.29412	2.67698e-55
-14.4	5.31488	1.05282e-55
-14.4	5.33564	4.12609e-56
-14.4	5.3564	1.6114e-56
-14.4	5.37716	6.27116e-57
-14.4	5.39792	2.43204e-57
-14.4	5.41869	9.39878e-58
-14.4	5.43945	3.61952e-58
-14.4	5.46021	1.38902e-58
-14.4	5.48097	5.31184e-59
-14.4	5.50173	2.02423e-59
-14.4	5.52249	7.68689e-60
-14.4	5.54325	2.90884e-60
-14.4	5.56401	1.0969e-60
-14.4	5.58478	4.12183e-61
-14.4	5.60554	1.54344e-61
-14.4	5.6263	5.75929e-62
-14.4	5.64706	2.14152e-62
-14.4	5.66782	7.93513e-63
-14.4	5.68858	2.92996e-63
-14.4	5.70934	1.07807e-63
-14.4	5.7301	3.9528e-64
-14.4	5.75087	1.44424e-64
-14.4	5.77163	5.25837e-65
-14.4	5.79239	1.90782e-65
-14.4	5.81315	6.89761e-66
-14.4	5.83391	2.48505e-66
-14.4	5.85467	8.92167e-67
-14.4	5.87543	3.19178e-67
-14.4	5.89619	1.13787e-67
-14.4	5.91696	4.04229e-68
-14.4	5.93772	1.43099e-68
-14.4	5.95848	5.04798e-69
-14.4	5.97924	1.77449e-69
-14.4	6	6.21589e-70
-14.35	0	0.000604308
-14.35	0.02076	0.00121
-14.35	0.04152	0.00162
-14.35	0.06228	0.00182
-14.35	0.08305	0.00188
-14.35	0.10381	0.00189
-14.35	0.12457	0.00193
-14.35	0.14533	0.00208
-14.35	0.16609	0.00234
-14.35	0.18685	0.00266
-14.35	0.20761	0.00296
-14.35	0.22837	0.00319
-14.35	0.24914	0.00331
-14.35	0.2699	0.00332
-14.35	0.29066	0.00324
-14.35	0.31142	0.00311
-14.35	0.33218	0.00299
-14.35	0.35294	0.00292
-14.35	0.3737	0.00292
-14.35	0.39446	0.00298
-14.35	0.41523	0.00306
-14.35	0.43599	0.0031
-14.35	0.45675	0.00308
-14.35	0.47751	0.00299
-14.35	0.49827	0.00282
-14.35	0.51903	0.00257
-14.35	0.53979	0.00228
-14.35	0.56055	0.00196
-14.35	0.58132	0.00165
-14.35	0.60208	0.00137
-14.35	0.62284	0.00116
-14.35	0.6436	0.00106
-14.35	0.66436	0.00106
-14.35	0.68512	0.00113
-14.35	0.70588	0.00122
-14.35	0.72664	0.0013
-14.35	0.74741	0.00135
-14.35	0.76817	0.00138
-14.35	0.78893	0.00137
-14.35	0.80969	0.00134
-14.35	0.83045	0.00128
-14.35	0.85121	0.0012
-14.35	0.87197	0.00112
-14.35	0.89273	0.00102
-14.35	0.9135	0.000918559
-14.35	0.93426	0.000817581
-14.35	0.95502	0.000719228
-14.35	0.97578	0.000625727
-14.35	0.99654	0.00053866
-14.35	1.0173	0.000459042
-14.35	1.03806	0.000387406
-14.35	1.05882	0.000323897
-14.35	1.07959	0.000268353
-14.35	1.10035	0.000220389
-14.35	1.12111	0.000179461
-14.35	1.14187	0.00014493
-14.35	1.16263	0.000116108
-14.35	1.18339	9.22964e-05
-14.35	1.20415	7.28176e-05
-14.35	1.22491	5.70327e-05
-14.35	1.24568	4.43566e-05
-14.35	1.26644	3.4265e-05
-14.35	1.2872	2.62979e-05
-14.35	1.30796	2.0058e-05
-14.35	1.32872	1.52082e-05
-14.35	1.34948	1.14662e-05
-14.35	1.37024	8.59902e-06
-14.35	1.391	6.41663e-06
-14.35	1.41177	4.76583e-06
-14.35	1.43253	3.52446e-06
-14.35	1.45329	2.59613e-06
-14.35	1.47405	1.90543e-06
-14.35	1.49481	1.39396e-06
-14.35	1.51557	1.01684e-06
-14.35	1.53633	7.39857e-07
-14.35	1.55709	5.37125e-07
-14.35	1.57786	3.89188e-07
-14.35	1.59862	2.81519e-07
-14.35	1.61938	2.0333e-07
-14.35	1.64014	1.46656e-07
-14.35	1.6609	1.05643e-07
-14.35	1.68166	7.60016e-08
-14.35	1.70242	5.46048e-08
-14.35	1.72318	3.91761e-08
-14.35	1.74395	2.80629e-08
-14.35	1.76471	2.00674e-08
-14.35	1.78547	1.43222e-08
-14.35	1.80623	1.01999e-08
-14.35	1.82699	7.24708e-09
-14.35	1.84775	5.13592e-09
-14.35	1.86851	3.62975e-09
-14.35	1.88927	2.55777e-09
-14.35	1.91004	1.79681e-09
-14.35	1.9308	1.25815e-09
-14.35	1.95156	8.78022e-10
-14.35	1.97232	6.1062e-10
-14.35	1.99308	4.23148e-10
-14.35	2.01384	2.92173e-10
-14.35	2.0346	2.00996e-10
-14.35	2.05536	1.37759e-10
-14.35	2.07613	9.40634e-11
-14.35	2.09689	6.39856e-11
-14.35	2.11765	4.3361e-11
-14.35	2.13841	2.92731e-11
-14.35	2.15917	1.96874e-11
-14.35	2.17993	1.31906e-11
-14.35	2.20069	8.80437e-12
-14.35	2.22145	5.85456e-12
-14.35	2.24222	3.87845e-12
-14.35	2.26298	2.55974e-12
-14.35	2.28374	1.68312e-12
-14.35	2.3045	1.10261e-12
-14.35	2.32526	7.19657e-13
-14.35	2.34602	4.67983e-13
-14.35	2.36678	3.0321e-13
-14.35	2.38754	1.95737e-13
-14.35	2.4083	1.25899e-13
-14.35	2.42907	8.06866e-14
-14.35	2.44983	5.15244e-14
-14.35	2.47059	3.27841e-14
-14.35	2.49135	2.07854e-14
-14.35	2.51211	1.31311e-14
-14.35	2.53287	8.26602e-15
-14.35	2.55363	5.185e-15
-14.35	2.57439	3.24087e-15
-14.35	2.59516	2.01854e-15
-14.35	2.61592	1.2528e-15
-14.35	2.63668	7.74807e-16
-14.35	2.65744	4.77506e-16
-14.35	2.6782	2.93251e-16
-14.35	2.69896	1.79464e-16
-14.35	2.71972	1.09444e-16
-14.35	2.74048	6.65106e-17
-14.35	2.76125	4.02784e-17
-14.35	2.78201	2.43074e-17
-14.35	2.80277	1.46181e-17
-14.35	2.82353	8.76054e-18
-14.35	2.84429	5.23192e-18
-14.35	2.86505	3.11374e-18
-14.35	2.88581	1.8467e-18
-14.35	2.90657	1.09145e-18
-14.35	2.92734	6.42844e-19
-14.35	2.9481	3.77315e-19
-14.35	2.96886	2.20698e-19
-14.35	2.98962	1.28645e-19
-14.35	3.01038	7.47285e-20
-14.35	3.03114	4.32594e-20
-14.35	3.0519	2.4956e-20
-14.35	3.07266	1.43474e-20
-14.35	3.09343	8.22004e-21
-14.35	3.11419	4.6933e-21
-14.35	3.13495	2.67047e-21
-14.35	3.15571	1.51427e-21
-14.35	3.17647	8.55704e-22
-14.35	3.19723	4.81894e-22
-14.35	3.21799	2.7045e-22
-14.35	3.23875	1.51262e-22
-14.35	3.25952	8.43101e-23
-14.35	3.28028	4.68316e-23
-14.35	3.30104	2.59243e-23
-14.35	3.3218	1.43016e-23
-14.35	3.34256	7.86267e-24
-14.35	3.36332	4.3079e-24
-14.35	3.38408	2.35218e-24
-14.35	3.40484	1.27993e-24
-14.35	3.42561	6.94082e-25
-14.35	3.44637	3.75098e-25
-14.35	3.46713	2.02017e-25
-14.35	3.48789	1.08428e-25
-14.35	3.50865	5.79966e-26
-14.35	3.52941	3.09153e-26
-14.35	3.55017	1.6423e-26
-14.35	3.57093	8.69442e-27
-14.35	3.5917	4.58708e-27
-14.35	3.61246	2.41179e-27
-14.35	3.63322	1.26372e-27
-14.35	3.65398	6.59886e-28
-14.35	3.67474	3.43395e-28
-14.35	3.6955	1.78084e-28
-14.35	3.71626	9.20368e-29
-14.35	3.73702	4.74028e-29
-14.35	3.75779	2.43305e-29
-14.35	3.77855	1.24452e-29
-14.35	3.79931	6.34393e-30
-14.35	3.82007	3.22268e-30
-14.35	3.84083	1.63147e-30
-14.35	3.86159	8.23086e-31
-14.35	3.88235	4.13821e-31
-14.35	3.90311	2.07339e-31
-14.35	3.92388	1.03527e-31
-14.35	3.94464	5.15139e-32
-14.35	3.9654	2.55445e-32
-14.35	3.98616	1.26232e-32
-14.35	4.00692	6.21644e-33
-14.35	4.02768	3.0508e-33
-14.35	4.04844	1.49205e-33
-14.35	4.0692	7.27199e-34
-14.35	4.08997	3.532e-34
-14.35	4.11073	1.70957e-34
-14.35	4.13149	8.24611e-35
-14.35	4.15225	3.96378e-35
-14.35	4.17301	1.89875e-35
-14.35	4.19377	9.06403e-36
-14.35	4.21453	4.31193e-36
-14.35	4.23529	2.04418e-36
-14.35	4.25606	9.65744e-37
-14.35	4.27682	4.54674e-37
-14.35	4.29758	2.13321e-37
-14.35	4.31834	9.97387e-38
-14.35	4.3391	4.64716e-38
-14.35	4.35986	2.15778e-38
-14.35	4.38062	9.98438e-39
-14.35	4.40138	4.60394e-39
-14.35	4.42215	2.11559e-39
-14.35	4.44291	9.68788e-40
-14.35	4.46367	4.42099e-40
-14.35	4.48443	2.0105e-40
-14.35	4.50519	9.11136e-41
-14.35	4.52595	4.11486e-41
-14.35	4.54671	1.85191e-41
-14.35	4.56747	8.30577e-42
-14.35	4.58824	3.71221e-42
-14.35	4.609	1.6534e-42
-14.35	4.62976	7.33865e-43
-14.35	4.65052	3.24599e-43
-14.35	4.67128	1.43078e-43
-14.35	4.69204	6.28477e-44
-14.35	4.7128	2.75106e-44
-14.35	4.73356	1.20006e-44
-14.35	4.75433	5.21671e-45
-14.35	4.77509	2.25988e-45
-14.35	4.79585	9.75584e-46
-14.35	4.81661	4.19698e-46
-14.35	4.83737	1.79929e-46
-14.35	4.85813	7.68702e-47
-14.35	4.87889	3.2727e-47
-14.35	4.89965	1.3885e-47
-14.35	4.92042	5.87056e-48
-14.35	4.94118	2.47346e-48
-14.35	4.96194	1.03853e-48
-14.35	4.9827	4.34538e-49
-14.35	5.00346	1.81187e-49
-14.35	5.02422	7.52867e-50
-14.35	5.04498	3.11746e-50
-14.35	5.06574	1.28639e-50
-14.35	5.08651	5.2898e-51
-14.35	5.10727	2.16768e-51
-14.35	5.12803	8.85201e-52
-14.35	5.14879	3.6023e-52
-14.35	5.16955	1.46086e-52
-14.35	5.19031	5.90374e-53
-14.35	5.21107	2.37759e-53
-14.35	5.23183	9.54196e-54
-14.35	5.2526	3.81618e-54
-14.35	5.27336	1.52093e-54
-14.35	5.29412	6.0406e-55
-14.35	5.31488	2.39079e-55
-14.35	5.33564	9.42957e-56
-14.35	5.3564	3.70623e-56
-14.35	5.37716	1.45165e-56
-14.35	5.39792	5.66607e-57
-14.35	5.41869	2.20389e-57
-14.35	5.43945	8.54257e-58
-14.35	5.46021	3.29971e-58
-14.35	5.48097	1.27014e-58
-14.35	5.50173	4.87209e-59
-14.35	5.52249	1.86238e-59
-14.35	5.54325	7.0943e-60
-14.35	5.56401	2.69301e-60
-14.35	5.58478	1.01872e-60
-14.35	5.60554	3.84026e-61
-14.35	5.6263	1.44263e-61
-14.35	5.64706	5.4005e-62
-14.35	5.66782	2.01466e-62
-14.35	5.68858	7.48955e-63
-14.35	5.70934	2.77458e-63
-14.35	5.7301	1.0243e-63
-14.35	5.75087	3.76826e-64
-14.35	5.77163	1.38147e-64
-14.35	5.79239	5.04695e-65
-14.35	5.81315	1.83739e-65
-14.35	5.83391	6.66594e-66
-14.35	5.85467	2.40994e-66
-14.35	5.87543	8.68232e-67
-14.35	5.89619	3.1171e-67
-14.35	5.91696	1.1152e-67
-14.35	5.93772	3.97591e-68
-14.35	5.95848	1.41256e-68
-14.35	5.97924	5.00103e-69
-14.35	6	1.7644e-69
-14.3	0	0.000604308
-14.3	0.02076	0.00121
-14.3	0.04152	0.00162
-14.3	0.06228	0.00182
-14.3	0.08305	0.00188
-14.3	0.10381	0.00189
-14.3	0.12457	0.00193
-14.3	0.14533	0.00208
-14.3	0.16609	0.00234
-14.3	0.18685	0.00266
-14.3	0.20761	0.00296
-14.3	0.22837	0.00319
-14.3	0.24914	0.00332
-14.3	0.2699	0.00333
-14.3	0.29066	0.00325
-14.3	0.31142	0.00312
-14.3	0.33218	0.003
-14.3	0.35294	0.00293
-14.3	0.3737	0.00294
-14.3	0.39446	0.003
-14.3	0.41523	0.00307
-14.3	0.43599	0.00312
-14.3	0.45675	0.0031
-14.3	0.47751	0.00301
-14.3	0.49827	0.00284
-14.3	0.51903	0.0026
-14.3	0.53979	0.0023
-14.3	0.56055	0.00198
-14.3	0.58132	0.00166
-14.3	0.60208	0.00138
-14.3	0.62284	0.00118
-14.3	0.6436	0.00107
-14.3	0.66436	0.00108
-14.3	0.68512	0.00114
-14.3	0.70588	0.00123
-14.3	0.72664	0.00131
-14.3	0.74741	0.00137
-14.3	0.76817	0.0014
-14.3	0.78893	0.0014
-14.3	0.80969	0.00136
-14.3	0.83045	0.00131
-14.3	0.85121	0.00123
-14.3	0.87197	0.00114
-14.3	0.89273	0.00105
-14.3	0.9135	0.000943815
-14.3	0.93426	0.000841173
-14.3	0.95502	0.000740973
-14.3	0.97578	0.000645519
-14.3	0.99654	0.000556461
-14.3	1.0173	0.000474872
-14.3	1.03806	0.000401331
-14.3	1.05882	0.000336019
-14.3	1.07959	0.0002788
-14.3	1.10035	0.000229304
-14.3	1.12111	0.000186998
-14.3	1.14187	0.000151244
-14.3	1.16263	0.00012135
-14.3	1.18339	9.66115e-05
-14.3	1.20415	7.63401e-05
-14.3	1.22491	5.9885e-05
-14.3	1.24568	4.66482e-05
-14.3	1.26644	3.60924e-05
-14.3	1.2872	2.77446e-05
-14.3	1.30796	2.11954e-05
-14.3	1.32872	1.60965e-05
-14.3	1.34948	1.21556e-05
-14.3	1.37024	9.13081e-06
-14.3	1.391	6.82455e-06
-14.3	1.41177	5.07708e-06
-14.3	1.43253	3.76079e-06
-14.3	1.45329	2.77474e-06
-14.3	1.47405	2.03987e-06
-14.3	1.49481	1.49477e-06
-14.3	1.51557	1.09219e-06
-14.3	1.53633	7.96003e-07
-14.3	1.55709	5.78856e-07
-14.3	1.57786	4.20136e-07
-14.3	1.59862	3.04426e-07
-14.3	1.61938	2.20257e-07
-14.3	1.64014	1.59147e-07
-14.3	1.6609	1.14847e-07
-14.3	1.68166	8.2776e-08
-14.3	1.70242	5.95843e-08
-14.3	1.72318	4.28313e-08
-14.3	1.74395	3.0742e-08
-14.3	1.76471	2.20277e-08
-14.3	1.78547	1.57539e-08
-14.3	1.80623	1.12433e-08
-14.3	1.82699	8.00572e-09
-14.3	1.84775	5.68607e-09
-14.3	1.86851	4.0276e-09
-14.3	1.88927	2.8446e-09
-14.3	1.91004	2.00294e-09
-14.3	1.9308	1.40579e-09
-14.3	1.95156	9.83392e-10
-14.3	1.97232	6.85551e-10
-14.3	1.99308	4.76234e-10
-14.3	2.01384	3.29639e-10
-14.3	2.0346	2.27337e-10
-14.3	2.05536	1.56204e-10
-14.3	2.07613	1.0693e-10
-14.3	2.09689	7.29244e-11
-14.3	2.11765	4.95464e-11
-14.3	2.13841	3.35362e-11
-14.3	2.15917	2.2614e-11
-14.3	2.17993	1.51916e-11
-14.3	2.20069	1.01671e-11
-14.3	2.22145	6.779e-12
-14.3	2.24222	4.50308e-12
-14.3	2.26298	2.98014e-12
-14.3	2.28374	1.96497e-12
-14.3	2.3045	1.29084e-12
-14.3	2.32526	8.44876e-13
-14.3	2.34602	5.50967e-13
-14.3	2.36678	3.57995e-13
-14.3	2.38754	2.31768e-13
-14.3	2.4083	1.49507e-13
-14.3	2.42907	9.60963e-14
-14.3	2.44983	6.15454e-14
-14.3	2.47059	3.92766e-14
-14.3	2.49135	2.49762e-14
-14.3	2.51211	1.58262e-14
-14.3	2.53287	9.99286e-15
-14.3	2.55363	6.28739e-15
-14.3	2.57439	3.94204e-15
-14.3	2.59516	2.4629e-15
-14.3	2.61592	1.53338e-15
-14.3	2.63668	9.5133e-16
-14.3	2.65744	5.88161e-16
-14.3	2.6782	3.62366e-16
-14.3	2.69896	2.22477e-16
-14.3	2.71972	1.36117e-16
-14.3	2.74048	8.29913e-17
-14.3	2.76125	5.0425e-17
-14.3	2.78201	3.05319e-17
-14.3	2.80277	1.8423e-17
-14.3	2.82353	1.10781e-17
-14.3	2.84429	6.63847e-18
-14.3	2.86505	3.96437e-18
-14.3	2.88581	2.3593e-18
-14.3	2.90657	1.39925e-18
-14.3	2.92734	8.27016e-19
-14.3	2.9481	4.87123e-19
-14.3	2.96886	2.85938e-19
-14.3	2.98962	1.67268e-19
-14.3	3.01038	9.75135e-20
-14.3	3.03114	5.66536e-20
-14.3	3.0519	3.28021e-20
-14.3	3.07266	1.89273e-20
-14.3	3.09343	1.08841e-20
-14.3	3.11419	6.23744e-21
-14.3	3.13495	3.56236e-21
-14.3	3.15571	2.02761e-21
-14.3	3.17647	1.15013e-21
-14.3	3.19723	6.50174e-22
-14.3	3.21799	3.66293e-22
-14.3	3.23875	2.05658e-22
-14.3	3.25952	1.15075e-22
-14.3	3.28028	6.41707e-23
-14.3	3.30104	3.56625e-23
-14.3	3.3218	1.97518e-23
-14.3	3.34256	1.09024e-23
-14.3	3.36332	5.99728e-24
-14.3	3.38408	3.28783e-24
-14.3	3.40484	1.79632e-24
-14.3	3.42561	9.78091e-25
-14.3	3.44637	5.30756e-25
-14.3	3.46713	2.87032e-25
-14.3	3.48789	1.54698e-25
-14.3	3.50865	8.30924e-26
-14.3	3.52941	4.44791e-26
-14.3	3.55017	2.37285e-26
-14.3	3.57093	1.26155e-26
-14.3	3.5917	6.68431e-27
-14.3	3.61246	3.52962e-27
-14.3	3.63322	1.85745e-27
-14.3	3.65398	9.74145e-28
-14.3	3.67474	5.09153e-28
-14.3	3.6955	2.6521e-28
-14.3	3.71626	1.37673e-28
-14.3	3.73702	7.12232e-29
-14.3	3.75779	3.67207e-29
-14.3	3.77855	1.88676e-29
-14.3	3.79931	9.66132e-30
-14.3	3.82007	4.93027e-30
-14.3	3.84083	2.50737e-30
-14.3	3.86159	1.27081e-30
-14.3	3.88235	6.41882e-31
-14.3	3.90311	3.23104e-31
-14.3	3.92388	1.62085e-31
-14.3	3.94464	8.10314e-32
-14.3	3.9654	4.03716e-32
-14.3	3.98616	2.00452e-32
-14.3	4.00692	9.91867e-33
-14.3	4.02768	4.89111e-33
-14.3	4.04844	2.40365e-33
-14.3	4.0692	1.17718e-33
-14.3	4.08997	5.74549e-34
-14.3	4.11073	2.79459e-34
-14.3	4.13149	1.35462e-34
-14.3	4.15225	6.54371e-35
-14.3	4.17301	3.15021e-35
-14.3	4.19377	1.51134e-35
-14.3	4.21453	7.22589e-36
-14.3	4.23529	3.44293e-36
-14.3	4.25606	1.63482e-36
-14.3	4.27682	7.73607e-37
-14.3	4.29758	3.64818e-37
-14.3	4.31834	1.7145e-37
-14.3	4.3391	8.02981e-38
-14.3	4.35986	3.74782e-38
-14.3	4.38062	1.74324e-38
-14.3	4.40138	8.08053e-39
-14.3	4.42215	3.73275e-39
-14.3	4.44291	1.71839e-39
-14.3	4.46367	7.88351e-40
-14.3	4.48443	3.60431e-40
-14.3	4.50519	1.64221e-40
-14.3	4.52595	7.45659e-41
-14.3	4.54671	3.37408e-41
-14.3	4.56747	1.52151e-41
-14.3	4.58824	6.83752e-42
-14.3	4.609	3.06215e-42
-14.3	4.62976	1.36665e-42
-14.3	4.65052	6.07843e-43
-14.3	4.67128	2.6942e-43
-14.3	4.69204	1.19007e-43
-14.3	4.7128	5.23861e-44
-14.3	4.73356	2.29808e-44
-14.3	4.75433	1.00465e-44
-14.3	4.77509	4.37694e-45
-14.3	4.79585	1.90032e-45
-14.3	4.81661	8.22221e-46
-14.3	4.83737	3.54529e-46
-14.3	4.85813	1.52341e-46
-14.3	4.87889	6.52359e-47
-14.3	4.89965	2.78393e-47
-14.3	4.92042	1.18395e-47
-14.3	4.94118	5.01775e-48
-14.3	4.96194	2.11928e-48
-14.3	4.9827	8.9201e-49
-14.3	5.00346	3.74156e-49
-14.3	5.02422	1.56401e-49
-14.3	5.04498	6.51519e-50
-14.3	5.06574	2.70468e-50
-14.3	5.08651	1.11894e-50
-14.3	5.10727	4.61319e-51
-14.3	5.12803	1.89538e-51
-14.3	5.14879	7.76057e-52
-14.3	5.16955	3.16659e-52
-14.3	5.19031	1.28763e-52
-14.3	5.21107	5.21785e-53
-14.3	5.23183	2.10714e-53
-14.3	5.2526	8.48002e-54
-14.3	5.27336	3.40095e-54
-14.3	5.29412	1.35927e-54
-14.3	5.31488	5.4139e-55
-14.3	5.33564	2.1489e-55
-14.3	5.3564	8.50007e-56
-14.3	5.37716	3.35065e-56
-14.3	5.39792	1.31624e-56
-14.3	5.41869	5.15278e-57
-14.3	5.43945	2.01024e-57
-14.3	5.46021	7.81546e-58
-14.3	5.48097	3.02803e-58
-14.3	5.50173	1.16914e-58
-14.3	5.52249	4.49851e-59
-14.3	5.54325	1.72493e-59
-14.3	5.56401	6.59134e-60
-14.3	5.58478	2.51001e-60
-14.3	5.60554	9.52519e-61
-14.3	5.6263	3.60223e-61
-14.3	5.64706	1.35759e-61
-14.3	5.66782	5.09872e-62
-14.3	5.68858	1.90833e-62
-14.3	5.70934	7.11774e-63
-14.3	5.7301	2.64563e-63
-14.3	5.75087	9.79969e-64
-14.3	5.77163	3.61737e-64
-14.3	5.79239	1.33067e-64
-14.3	5.81315	4.87805e-65
-14.3	5.83391	1.78204e-65
-14.3	5.85467	6.48761e-66
-14.3	5.87543	2.35368e-66
-14.3	5.89619	8.50957e-67
-14.3	5.91696	3.06593e-67
-14.3	5.93772	1.10081e-67
-14.3	5.95848	3.93876e-68
-14.3	5.97924	1.40443e-68
-14.3	6	4.99041e-69
-14.25	0	0.000604309
-14.25	0.02076	0.00121
-14.25	0.04152	0.00162
-14.25	0.06228	0.00182
-14.25	0.08305	0.00188
-14.25	0.10381	0.00189
-14.25	0.12457	0.00194
-14.25	0.14533	0.00208
-14.25	0.16609	0.00234
-14.25	0.18685	0.00266
-14.25	0.20761	0.00297
-14.25	0.22837	0.0032
-14.25	0.24914	0.00332
-14.25	0.2699	0.00334
-14.25	0.29066	0.00326
-14.25	0.31142	0.00313
-14.25	0.33218	0.00301
-14.25	0.35294	0.00294
-14.25	0.3737	0.00295
-14.25	0.39446	0.00301
-14.25	0.41523	0.00309
-14.25	0.43599	0.00314
-14.25	0.45675	0.00312
-14.25	0.47751	0.00303
-14.25	0.49827	0.00286
-14.25	0.51903	0.00262
-14.25	0.53979	0.00232
-14.25	0.56055	0.002
-14.25	0.58132	0.00168
-14.25	0.60208	0.0014
-14.25	0.62284	0.00119
-14.25	0.6436	0.00108
-14.25	0.66436	0.00109
-14.25	0.68512	0.00116
-14.25	0.70588	0.00125
-14.25	0.72664	0.00133
-14.25	0.74741	0.0014
-14.25	0.76817	0.00143
-14.25	0.78893	0.00142
-14.25	0.80969	0.00139
-14.25	0.83045	0.00134
-14.25	0.85121	0.00126
-14.25	0.87197	0.00117
-14.25	0.89273	0.00107
-14.25	0.9135	0.000969689
-14.25	0.93426	0.000865376
-14.25	0.95502	0.000763311
-14.25	0.97578	0.000665878
-14.25	0.99654	0.000574798
-14.25	1.0173	0.0004912
-14.25	1.03806	0.000415715
-14.25	1.05882	0.000348558
-14.25	1.07959	0.000289622
-14.25	1.10035	0.000238554
-14.25	1.12111	0.000194829
-14.25	1.14187	0.000157813
-14.25	1.16263	0.000126813
-14.25	1.18339	0.000101115
-14.25	1.20415	8.00223e-05
-14.25	1.22491	6.28713e-05
-14.25	1.24568	4.90513e-05
-14.25	1.26644	3.80117e-05
-14.25	1.2872	2.92665e-05
-14.25	1.30796	2.23938e-05
-14.25	1.32872	1.70339e-05
-14.25	1.34948	1.28842e-05
-14.25	1.37024	9.69385e-06
-14.25	1.391	7.25714e-06
-14.25	1.41177	5.40769e-06
-14.25	1.43253	4.01222e-06
-14.25	1.45329	2.96509e-06
-14.25	1.47405	2.18338e-06
-14.25	1.49481	1.60256e-06
-14.25	1.51557	1.17287e-06
-14.25	1.53633	8.56227e-07
-14.25	1.55709	6.23691e-07
-14.25	1.57786	4.53441e-07
-14.25	1.59862	3.29118e-07
-14.25	1.61938	2.38535e-07
-14.25	1.64014	1.72658e-07
-14.25	1.6609	1.24821e-07
-14.25	1.68166	9.01297e-08
-14.25	1.70242	6.49995e-08
-14.25	1.72318	4.68138e-08
-14.25	1.74395	3.36667e-08
-14.25	1.76471	2.4172e-08
-14.25	1.78547	1.73231e-08
-14.25	1.80623	1.23894e-08
-14.25	1.82699	8.84079e-09
-14.25	1.84775	6.29299e-09
-14.25	1.86851	4.46747e-09
-14.25	1.88927	3.16246e-09
-14.25	1.91004	2.2319e-09
-14.25	1.9308	1.57016e-09
-14.25	1.95156	1.10099e-09
-14.25	1.97232	7.69375e-10
-14.25	1.99308	5.35766e-10
-14.25	2.01384	3.71759e-10
-14.25	2.0346	2.57022e-10
-14.25	2.05536	1.77045e-10
-14.25	2.07613	1.21503e-10
-14.25	2.09689	8.30754e-11
-14.25	2.11765	5.65889e-11
-14.25	2.13841	3.84027e-11
-14.25	2.15917	2.59636e-11
-14.25	2.17993	1.7488e-11
-14.25	2.20069	1.17352e-11
-14.25	2.22145	7.84558e-12
-14.25	2.24222	5.22571e-12
-14.25	2.26298	3.46784e-12
-14.25	2.28374	2.29284e-12
-14.25	2.3045	1.51041e-12
-14.25	2.32526	9.91355e-13
-14.25	2.34602	6.48314e-13
-14.25	2.36678	4.22445e-13
-14.25	2.38754	2.74277e-13
-14.25	2.4083	1.7744e-13
-14.25	2.42907	1.14383e-13
-14.25	2.44983	7.34721e-14
-14.25	2.47059	4.70266e-14
-14.25	2.49135	2.99936e-14
-14.25	2.51211	1.90626e-14
-14.25	2.53287	1.20728e-14
-14.25	2.55363	7.61927e-15
-14.25	2.57439	4.79179e-15
-14.25	2.59516	3.00308e-15
-14.25	2.61592	1.87553e-15
-14.25	2.63668	1.16727e-15
-14.25	2.65744	7.23956e-16
-14.25	2.6782	4.47454e-16
-14.25	2.69896	2.75602e-16
-14.25	2.71972	1.69167e-16
-14.25	2.74048	1.03479e-16
-14.25	2.76125	6.30802e-17
-14.25	2.78201	3.83212e-17
-14.25	2.80277	2.32003e-17
-14.25	2.82353	1.39977e-17
-14.25	2.84429	8.41645e-18
-14.25	2.86505	5.04329e-18
-14.25	2.88581	3.01171e-18
-14.25	2.90657	1.79236e-18
-14.25	2.92734	1.06305e-18
-14.25	2.9481	6.2835e-19
-14.25	2.96886	3.7014e-19
-14.25	2.98962	2.17295e-19
-14.25	3.01038	1.27132e-19
-14.25	3.03114	7.41278e-20
-14.25	3.0519	4.30754e-20
-14.25	3.07266	2.4946e-20
-14.25	3.09343	1.43979e-20
-14.25	3.11419	8.28169e-21
-14.25	3.13495	4.74751e-21
-14.25	3.15571	2.71231e-21
-14.25	3.17647	1.54433e-21
-14.25	3.19723	8.76334e-22
-14.25	3.21799	4.95595e-22
-14.25	3.23875	2.79327e-22
-14.25	3.25952	1.56902e-22
-14.25	3.28028	8.78362e-23
-14.25	3.30104	4.90059e-23
-14.25	3.3218	2.72492e-23
-14.25	3.34256	1.51005e-23
-14.25	3.36332	8.33984e-24
-14.25	3.38408	4.59045e-24
-14.25	3.40484	2.51816e-24
-14.25	3.42561	1.37671e-24
-14.25	3.44637	7.50126e-25
-14.25	3.46713	4.07339e-25
-14.25	3.48789	2.20449e-25
-14.25	3.50865	1.18902e-25
-14.25	3.52941	6.39151e-26
-14.25	3.55017	3.4241e-26
-14.25	3.57093	1.82818e-26
-14.25	3.5917	9.72797e-27
-14.25	3.61246	5.15887e-27
-14.25	3.63322	2.72656e-27
-14.25	3.65398	1.43616e-27
-14.25	3.67474	7.53913e-28
-14.25	3.6955	3.94427e-28
-14.25	3.71626	2.05655e-28
-14.25	3.73702	1.06866e-28
-14.25	3.75779	5.53432e-29
-14.25	3.77855	2.85638e-29
-14.25	3.79931	1.46924e-29
-14.25	3.82007	7.53174e-30
-14.25	3.84083	3.84789e-30
-14.25	3.86159	1.95918e-30
-14.25	3.88235	9.94143e-31
-14.25	3.90311	5.02744e-31
-14.25	3.92388	2.53378e-31
-14.25	3.94464	1.27266e-31
-14.25	3.9654	6.37056e-32
-14.25	3.98616	3.17808e-32
-14.25	4.00692	1.58006e-32
-14.25	4.02768	7.82894e-33
-14.25	4.04844	3.86592e-33
-14.25	4.0692	1.90249e-33
-14.25	4.08997	9.33065e-34
-14.25	4.11073	4.56059e-34
-14.25	4.13149	2.22151e-34
-14.25	4.15225	1.07844e-34
-14.25	4.17301	5.21748e-35
-14.25	4.19377	2.51561e-35
-14.25	4.21453	1.20877e-35
-14.25	4.23529	5.78846e-36
-14.25	4.25606	2.76248e-36
-14.25	4.27682	1.31387e-36
-14.25	4.29758	6.22762e-37
-14.25	4.31834	2.94177e-37
-14.25	4.3391	1.38488e-37
-14.25	4.35986	6.49725e-38
-14.25	4.38062	3.03784e-38
-14.25	4.40138	1.41552e-38
-14.25	4.42215	6.57327e-39
-14.25	4.44291	3.04203e-39
-14.25	4.46367	1.40301e-39
-14.25	4.48443	6.44871e-40
-14.25	4.50519	2.95393e-40
-14.25	4.52595	1.34847e-40
-14.25	4.54671	6.13478e-41
-14.25	4.56747	2.78145e-41
-14.25	4.58824	1.25677e-41
-14.25	4.609	5.65924e-42
-14.25	4.62976	2.53964e-42
-14.25	4.65052	1.1358e-42
-14.25	4.67128	5.06227e-43
-14.25	4.69204	2.24855e-43
-14.25	4.7128	9.95347e-44
-14.25	4.73356	4.39097e-44
-14.25	4.75433	1.93045e-44
-14.25	4.77509	8.45809e-45
-14.25	4.79585	3.69317e-45
-14.25	4.81661	1.60709e-45
-14.25	4.83737	6.96936e-46
-14.25	4.85813	3.01203e-46
-14.25	4.87889	1.2973e-46
-14.25	4.89965	5.56844e-47
-14.25	4.92042	2.38199e-47
-14.25	4.94118	1.01546e-47
-14.25	4.96194	4.31414e-48
-14.25	4.9827	1.82658e-48
-14.25	5.00346	7.70724e-49
-14.25	5.02422	3.24093e-49
-14.25	5.04498	1.35817e-49
-14.25	5.06574	5.6722e-50
-14.25	5.08651	2.36081e-50
-14.25	5.10727	9.79225e-51
-14.25	5.12803	4.04778e-51
-14.25	5.14879	1.66749e-51
-14.25	5.16955	6.84576e-52
-14.25	5.19031	2.80086e-52
-14.25	5.21107	1.14202e-52
-14.25	5.23183	4.64054e-53
-14.25	5.2526	1.8792e-53
-14.25	5.27336	7.58388e-54
-14.25	5.29412	3.05014e-54
-14.25	5.31488	1.22253e-54
-14.25	5.33564	4.88328e-55
-14.25	5.3564	1.9439e-55
-14.25	5.37716	7.71164e-56
-14.25	5.39792	3.04881e-56
-14.25	5.41869	1.20123e-56
-14.25	5.43945	4.71661e-57
-14.25	5.46021	1.84563e-57
-14.25	5.48097	7.19733e-58
-14.25	5.50173	2.79709e-58
-14.25	5.52249	1.08331e-58
-14.25	5.54325	4.18126e-59
-14.25	5.56401	1.60832e-59
-14.25	5.58478	6.16519e-60
-14.25	5.60554	2.35521e-60
-14.25	5.6263	8.96648e-61
-14.25	5.64706	3.40191e-61
-14.25	5.66782	1.28627e-61
-14.25	5.68858	4.84676e-62
-14.25	5.70934	1.82003e-62
-14.25	5.7301	6.81103e-63
-14.25	5.75087	2.54013e-63
-14.25	5.77163	9.44074e-64
-14.25	5.79239	3.49675e-64
-14.25	5.81315	1.29071e-64
-14.25	5.83391	4.74791e-65
-14.25	5.85467	1.74053e-65
-14.25	5.87543	6.3587e-66
-14.25	5.89619	2.31506e-66
-14.25	5.91696	8.39965e-67
-14.25	5.93772	3.03715e-67
-14.25	5.95848	1.09441e-67
-14.25	5.97924	3.93003e-68
-14.25	6	1.40643e-68
-14.2	0	0.000604309
-14.2	0.02076	0.00121
-14.2	0.04152	0.00162
-14.2	0.06228	0.00182
-14.2	0.08305	0.00188
-14.2	0.10381	0.00189
-14.2	0.12457	0.00194
-14.2	0.14533	0.00208
-14.2	0.16609	0.00235
-14.2	0.18685	0.00267
-14.2	0.20761	0.00297
-14.2	0.22837	0.0032
-14.2	0.24914	0.00333
-14.2	0.2699	0.00335
-14.2	0.29066	0.00327
-14.2	0.31142	0.00314
-14.2	0.33218	0.00302
-14.2	0.35294	0.00295
-14.2	0.3737	0.00296
-14.2	0.39446	0.00302
-14.2	0.41523	0.0031
-14.2	0.43599	0.00316
-14.2	0.45675	0.00315
-14.2	0.47751	0.00306
-14.2	0.49827	0.00289
-14.2	0.51903	0.00264
-14.2	0.53979	0.00235
-14.2	0.56055	0.00202
-14.2	0.58132	0.0017
-14.2	0.60208	0.00141
-14.2	0.62284	0.0012
-14.2	0.6436	0.00109
-14.2	0.66436	0.0011
-14.2	0.68512	0.00117
-14.2	0.70588	0.00127
-14.2	0.72664	0.00135
-14.2	0.74741	0.00142
-14.2	0.76817	0.00145
-14.2	0.78893	0.00145
-14.2	0.80969	0.00142
-14.2	0.83045	0.00137
-14.2	0.85121	0.00129
-14.2	0.87197	0.0012
-14.2	0.89273	0.0011
-14.2	0.9135	0.000996195
-14.2	0.93426	0.000890202
-14.2	0.95502	0.000786255
-14.2	0.97578	0.000686818
-14.2	0.99654	0.000593683
-14.2	1.0173	0.000508042
-14.2	1.03806	0.000430572
-14.2	1.05882	0.000361528
-14.2	1.07959	0.000300832
-14.2	1.10035	0.000248148
-14.2	1.12111	0.000202965
-14.2	1.14187	0.000164649
-14.2	1.16263	0.000132505
-14.2	1.18339	0.000105816
-14.2	1.20415	8.3871e-05
-14.2	1.22491	6.59975e-05
-14.2	1.24568	5.15709e-05
-14.2	1.26644	4.00273e-05
-14.2	1.2872	3.08672e-05
-14.2	1.30796	2.36563e-05
-14.2	1.32872	1.80231e-05
-14.2	1.34948	1.36544e-05
-14.2	1.37024	1.02899e-05
-14.2	1.391	7.71582e-06
-14.2	1.41177	5.75881e-06
-14.2	1.43253	4.27968e-06
-14.2	1.45329	3.1679e-06
-14.2	1.47405	2.33653e-06
-14.2	1.49481	1.71778e-06
-14.2	1.51557	1.25926e-06
-14.2	1.53633	9.20811e-07
-14.2	1.55709	6.7185e-07
-14.2	1.57786	4.89274e-07
-14.2	1.59862	3.5573e-07
-14.2	1.61938	2.58267e-07
-14.2	1.64014	1.87268e-07
-14.2	1.6609	1.35625e-07
-14.2	1.68166	9.81099e-08
-14.2	1.70242	7.08869e-08
-14.2	1.72318	5.11518e-08
-14.2	1.74395	3.68585e-08
-14.2	1.76471	2.65169e-08
-14.2	1.78547	1.90427e-08
-14.2	1.80623	1.36479e-08
-14.2	1.82699	9.7597e-09
-14.2	1.84775	6.9623e-09
-14.2	1.86851	4.95364e-09
-14.2	1.88927	3.51457e-09
-14.2	1.91004	2.48611e-09
-14.2	1.9308	1.75309e-09
-14.2	1.95156	1.23217e-09
-14.2	1.97232	8.63112e-10
-14.2	1.99308	6.025e-10
-14.2	2.01384	4.19089e-10
-14.2	2.0346	2.90463e-10
-14.2	2.05536	2.00582e-10
-14.2	2.07613	1.38004e-10
-14.2	2.09689	9.45979e-11
-14.2	2.11765	6.46036e-11
-14.2	2.13841	4.39555e-11
-14.2	2.15917	2.97955e-11
-14.2	2.17993	2.0122e-11
-14.2	2.20069	1.35387e-11
-14.2	2.22145	9.07554e-12
-14.2	2.24222	6.0613e-12
-14.2	2.26298	4.03331e-12
-14.2	2.28374	2.67403e-12
-14.2	2.3045	1.7664e-12
-14.2	2.32526	1.16261e-12
-14.2	2.34602	7.62448e-13
-14.2	2.36678	4.98224e-13
-14.2	2.38754	3.24402e-13
-14.2	2.4083	2.10472e-13
-14.2	2.42907	1.3607e-13
-14.2	2.44983	8.76582e-14
-14.2	2.47059	5.6272e-14
-14.2	2.49135	3.5997e-14
-14.2	2.51211	2.29466e-14
-14.2	2.53287	1.45766e-14
-14.2	2.55363	9.22737e-15
-14.2	2.57439	5.82093e-15
-14.2	2.59516	3.65932e-15
-14.2	2.61592	2.29249e-15
-14.2	2.63668	1.43125e-15
-14.2	2.65744	8.90483e-16
-14.2	2.6782	5.52132e-16
-14.2	2.69896	3.41168e-16
-14.2	2.71972	2.10089e-16
-14.2	2.74048	1.28929e-16
-14.2	2.76125	7.88523e-17
-14.2	2.78201	4.80611e-17
-14.2	2.80277	2.91938e-17
-14.2	2.82353	1.76728e-17
-14.2	2.84429	1.06621e-17
-14.2	2.86505	6.41067e-18
-14.2	2.88581	3.84138e-18
-14.2	2.90657	2.29401e-18
-14.2	2.92734	1.36531e-18
-14.2	2.9481	8.09828e-19
-14.2	2.96886	4.78723e-19
-14.2	2.98962	2.82037e-19
-14.2	3.01038	1.65599e-19
-14.2	3.03114	9.6904e-20
-14.2	3.0519	5.65143e-20
-14.2	3.07266	3.2848e-20
-14.2	3.09343	1.90281e-20
-14.2	3.11419	1.09854e-20
-14.2	3.13495	6.32082e-21
-14.2	3.15571	3.62467e-21
-14.2	3.17647	2.07157e-21
-14.2	3.19723	1.17997e-21
-14.2	3.21799	6.69855e-22
-14.2	3.23875	3.78992e-22
-14.2	3.25952	2.13707e-22
-14.2	3.28028	1.20101e-22
-14.2	3.30104	6.72695e-23
-14.2	3.3218	3.75517e-23
-14.2	3.34256	2.08921e-23
-14.2	3.36332	1.15844e-23
-14.2	3.38408	6.40191e-24
-14.2	3.40484	3.52603e-24
-14.2	3.42561	1.93555e-24
-14.2	3.44637	1.05892e-24
-14.2	3.46713	5.77384e-25
-14.2	3.48789	3.13767e-25
-14.2	3.50865	1.69938e-25
-14.2	3.52941	9.17309e-26
-14.2	3.55017	4.93493e-26
-14.2	3.57093	2.64598e-26
-14.2	3.5917	1.41395e-26
-14.2	3.61246	7.53043e-27
-14.2	3.63322	3.9971e-27
-14.2	3.65398	2.11451e-27
-14.2	3.67474	1.11484e-27
-14.2	3.6955	5.85809e-28
-14.2	3.71626	3.06786e-28
-14.2	3.73702	1.60123e-28
-14.2	3.75779	8.32931e-29
-14.2	3.77855	4.31818e-29
-14.2	3.79931	2.23115e-29
-14.2	3.82007	1.14893e-29
-14.2	3.84083	5.89645e-30
-14.2	3.86159	3.01595e-30
-14.2	3.88235	1.53742e-30
-14.2	3.90311	7.8108e-31
-14.2	3.92388	3.95486e-31
-14.2	3.94464	1.99572e-31
-14.2	3.9654	1.0037e-31
-14.2	3.98616	5.03079e-32
-14.2	4.00692	2.51305e-32
-14.2	4.02768	1.25112e-32
-14.2	4.04844	6.20766e-33
-14.2	4.0692	3.06964e-33
-14.2	4.08997	1.51278e-33
-14.2	4.11073	7.43012e-34
-14.2	4.13149	3.63702e-34
-14.2	4.15225	1.77429e-34
-14.2	4.17301	8.62644e-35
-14.2	4.19377	4.17992e-35
-14.2	4.21453	2.01852e-35
-14.2	4.23529	9.71461e-36
-14.2	4.25606	4.65958e-36
-14.2	4.27682	2.22738e-36
-14.2	4.29758	1.06114e-36
-14.2	4.31834	5.03819e-37
-14.2	4.3391	2.38399e-37
-14.2	4.35986	1.12425e-37
-14.2	4.38062	5.28378e-38
-14.2	4.40138	2.47488e-38
-14.2	4.42215	1.15529e-38
-14.2	4.44291	5.37469e-39
-14.2	4.46367	2.49196e-39
-14.2	4.48443	1.15148e-39
-14.2	4.50519	5.30268e-40
-14.2	4.52595	2.43366e-40
-14.2	4.54671	1.11314e-40
-14.2	4.56747	5.07419e-41
-14.2	4.58824	2.30519e-41
-14.2	4.609	1.04369e-41
-14.2	4.62976	4.70939e-42
-14.2	4.65052	2.11778e-42
-14.2	4.67128	9.49118e-43
-14.2	4.69204	4.23922e-43
-14.2	4.7128	1.88701e-43
-14.2	4.73356	8.37123e-44
-14.2	4.75433	3.70107e-44
-14.2	4.77509	1.63076e-44
-14.2	4.79585	7.16106e-45
-14.2	4.81661	3.13393e-45
-14.2	4.83737	1.36686e-45
-14.2	4.85813	5.94132e-46
-14.2	4.87889	2.57375e-46
-14.2	4.89965	1.11115e-46
-14.2	4.92042	4.78084e-47
-14.2	4.94118	2.05002e-47
-14.2	4.96194	8.76066e-48
-14.2	4.9827	3.73111e-48
-14.2	5.00346	1.58367e-48
-14.2	5.02422	6.69903e-49
-14.2	5.04498	2.82412e-49
-14.2	5.06574	1.18653e-49
-14.2	5.08651	4.96817e-50
-14.2	5.10727	2.07318e-50
-14.2	5.12803	8.62187e-51
-14.2	5.14879	3.57345e-51
-14.2	5.16955	1.47604e-51
-14.2	5.19031	6.07617e-52
-14.2	5.21107	2.49278e-52
-14.2	5.23183	1.0192e-52
-14.2	5.2526	4.15299e-53
-14.2	5.27336	1.68648e-53
-14.2	5.29412	6.82535e-54
-14.2	5.31488	2.7529e-54
-14.2	5.33564	1.10657e-54
-14.2	5.3564	4.43288e-55
-14.2	5.37716	1.76977e-55
-14.2	5.39792	7.04155e-56
-14.2	5.41869	2.79216e-56
-14.2	5.43945	1.10341e-56
-14.2	5.46021	4.3456e-57
-14.2	5.48097	1.70563e-57
-14.2	5.50173	6.67178e-58
-14.2	5.52249	2.60087e-58
-14.2	5.54325	1.01045e-58
-14.2	5.56401	3.91231e-59
-14.2	5.58478	1.50963e-59
-14.2	5.60554	5.80535e-60
-14.2	5.6263	2.22487e-60
-14.2	5.64706	8.4977e-61
-14.2	5.66782	3.23458e-61
-14.2	5.68858	1.22702e-61
-14.2	5.70934	4.6388e-62
-14.2	5.7301	1.74775e-62
-14.2	5.75087	6.56251e-63
-14.2	5.77163	2.45572e-63
-14.2	5.79239	9.15814e-64
-14.2	5.81315	3.40372e-64
-14.2	5.83391	1.26072e-64
-14.2	5.85467	4.6537e-65
-14.2	5.87543	1.71198e-65
-14.2	5.89619	6.27644e-66
-14.2	5.91696	2.29323e-66
-14.2	5.93772	8.3502e-67
-14.2	5.95848	3.03014e-67
-14.2	5.97924	1.09584e-67
-14.2	6	3.94953e-68
-14.15	0	0.00060431
-14.15	0.02076	0.00121
-14.15	0.04152	0.00162
-14.15	0.06228	0.00182
-14.15	0.08305	0.00188
-14.15	0.10381	0.00189
-14.15	0.12457	0.00194
-14.15	0.14533	0.00209
-14.15	0.16609	0.00235
-14.15	0.18685	0.00267
-14.15	0.20761	0.00298
-14.15	0.22837	0.00321
-14.15	0.24914	0.00334
-14.15	0.2699	0.00335
-14.15	0.29066	0.00328
-14.15	0.31142	0.00315
-14.15	0.33218	0.00303
-14.15	0.35294	0.00296
-14.15	0.3737	0.00297
-14.15	0.39446	0.00304
-14.15	0.41523	0.00312
-14.15	0.43599	0.00317
-14.15	0.45675	0.00317
-14.15	0.47751	0.00308
-14.15	0.49827	0.00291
-14.15	0.51903	0.00267
-14.15	0.53979	0.00237
-14.15	0.56055	0.00204
-14.15	0.58132	0.00172
-14.15	0.60208	0.00142
-14.15	0.62284	0.00121
-14.15	0.6436	0.0011
-14.15	0.66436	0.00111
-14.15	0.68512	0.00118
-14.15	0.70588	0.00128
-14.15	0.72664	0.00137
-14.15	0.74741	0.00144
-14.15	0.76817	0.00148
-14.15	0.78893	0.00148
-14.15	0.80969	0.00145
-14.15	0.83045	0.0014
-14.15	0.85121	0.00132
-14.15	0.87197	0.00123
-14.15	0.89273	0.00113
-14.15	0.9135	0.00102
-14.15	0.93426	0.000915666
-14.15	0.95502	0.000809819
-14.15	0.97578	0.000708354
-14.15	0.99654	0.000613133
-14.15	1.0173	0.00052541
-14.15	1.03806	0.000445914
-14.15	1.05882	0.000374942
-14.15	1.07959	0.000312442
-14.15	1.10035	0.0002581
-14.15	1.12111	0.000211415
-14.15	1.14187	0.00017176
-14.15	1.16263	0.000138436
-14.15	1.18339	0.00011072
-14.15	1.20415	8.78931e-05
-14.15	1.22491	6.92696e-05
-14.15	1.24568	5.42123e-05
-14.15	1.26644	4.21436e-05
-14.15	1.2872	3.25506e-05
-14.15	1.30796	2.49861e-05
-14.15	1.32872	1.90667e-05
-14.15	1.34948	1.44682e-05
-14.15	1.37024	1.09207e-05
-14.15	1.391	8.20206e-06
-14.15	1.41177	6.13163e-06
-14.15	1.43253	4.56413e-06
-14.15	1.45329	3.38394e-06
-14.15	1.47405	2.49993e-06
-14.15	1.49481	1.84091e-06
-14.15	1.51557	1.35173e-06
-14.15	1.53633	9.90055e-07
-14.15	1.55709	7.23569e-07
-14.15	1.57786	5.27818e-07
-14.15	1.59862	3.84402e-07
-14.15	1.61938	2.79562e-07
-14.15	1.64014	2.03062e-07
-14.15	1.6609	1.47326e-07
-14.15	1.68166	1.06768e-07
-14.15	1.70242	7.72859e-08
-14.15	1.72318	5.58755e-08
-14.15	1.74395	4.03408e-08
-14.15	1.76471	2.90802e-08
-14.15	1.78547	2.09262e-08
-14.15	1.80623	1.50292e-08
-14.15	1.82699	1.07705e-08
-14.15	1.84775	7.70013e-09
-14.15	1.86851	5.49078e-09
-14.15	1.88927	3.90447e-09
-14.15	1.91004	2.76826e-09
-14.15	1.9308	1.9566e-09
-14.15	1.95156	1.37845e-09
-14.15	1.97232	9.67889e-10
-14.15	1.99308	6.77274e-10
-14.15	2.01384	4.72254e-10
-14.15	2.0346	3.2812e-10
-14.15	2.05536	2.27151e-10
-14.15	2.07613	1.56678e-10
-14.15	2.09689	1.07671e-10
-14.15	2.11765	7.37205e-11
-14.15	2.13841	5.02883e-11
-14.15	2.15917	3.41771e-11
-14.15	2.17993	2.31417e-11
-14.15	2.20069	1.56118e-11
-14.15	2.22145	1.04932e-11
-14.15	2.24222	7.027e-12
-14.15	2.26298	4.68861e-12
-14.15	2.28374	3.117e-12
-14.15	2.3045	2.06469e-12
-14.15	2.32526	1.36272e-12
-14.15	2.34602	8.96189e-13
-14.15	2.36678	5.87272e-13
-14.15	2.38754	3.83472e-13
-14.15	2.4083	2.4951e-13
-14.15	2.42907	1.61775e-13
-14.15	2.44983	1.04522e-13
-14.15	2.47059	6.72947e-14
-14.15	2.49135	4.31757e-14
-14.15	2.51211	2.76049e-14
-14.15	2.53287	1.75884e-14
-14.15	2.55363	1.11677e-14
-14.15	2.57439	7.06648e-15
-14.15	2.59516	4.45602e-15
-14.15	2.61592	2.80026e-15
-14.15	2.63668	1.75372e-15
-14.15	2.65744	1.09456e-15
-14.15	2.6782	6.80817e-16
-14.15	2.69896	4.22029e-16
-14.15	2.71972	2.6072e-16
-14.15	2.74048	1.6052e-16
-14.15	2.76125	9.8494e-17
-14.15	2.78201	6.02305e-17
-14.15	2.80277	3.67072e-17
-14.15	2.82353	2.22955e-17
-14.15	2.84429	1.34962e-17
-14.15	2.86505	8.14219e-18
-14.15	2.88581	4.89559e-18
-14.15	2.90657	2.93362e-18
-14.15	2.92734	1.75202e-18
-14.15	2.9481	1.04283e-18
-14.15	2.96886	6.18621e-19
-14.15	2.98962	3.65744e-19
-14.15	3.01038	2.15512e-19
-14.15	3.03114	1.26563e-19
-14.15	3.0519	7.40778e-20
-14.15	3.07266	4.32128e-20
-14.15	3.09343	2.51236e-20
-14.15	3.11419	1.45579e-20
-14.15	3.13495	8.40736e-21
-14.15	3.15571	4.83916e-21
-14.15	3.17647	2.77605e-21
-14.15	3.19723	1.58721e-21
-14.15	3.21799	9.04463e-22
-14.15	3.23875	5.13686e-22
-14.15	3.25952	2.90773e-22
-14.15	3.28028	1.64045e-22
-14.15	3.30104	9.22403e-23
-14.15	3.3218	5.16929e-23
-14.15	3.34256	2.88731e-23
-14.15	3.36332	1.60734e-23
-14.15	3.38408	8.91811e-24
-14.15	3.40484	4.93163e-24
-14.15	3.42561	2.71807e-24
-14.15	3.44637	1.49308e-24
-14.15	3.46713	8.17444e-25
-14.15	3.48789	4.46051e-25
-14.15	3.50865	2.42584e-25
-14.15	3.52941	1.3149e-25
-14.15	3.55017	7.10353e-26
-14.15	3.57093	3.82478e-26
-14.15	3.5917	2.05253e-26
-14.15	3.61246	1.0978e-26
-14.15	3.63322	5.85205e-27
-14.15	3.65398	3.10915e-27
-14.15	3.67474	1.64636e-27
-14.15	3.6955	8.68876e-28
-14.15	3.71626	4.57024e-28
-14.15	3.73702	2.3959e-28
-14.15	3.75779	1.25183e-28
-14.15	3.77855	6.51884e-29
-14.15	3.79931	3.38331e-29
-14.15	3.82007	1.75009e-29
-14.15	3.84083	9.02244e-30
-14.15	3.86159	4.6359e-30
-14.15	3.88235	2.37404e-30
-14.15	3.90311	1.21168e-30
-14.15	3.92388	6.16355e-31
-14.15	3.94464	3.12477e-31
-14.15	3.9654	1.57888e-31
-14.15	3.98616	7.95101e-32
-14.15	4.00692	3.9906e-32
-14.15	4.02768	1.99617e-32
-14.15	4.04844	9.95168e-33
-14.15	4.0692	4.94467e-33
-14.15	4.08997	2.44861e-33
-14.15	4.11073	1.20849e-33
-14.15	4.13149	5.94437e-34
-14.15	4.15225	2.91413e-34
-14.15	4.17301	1.42381e-34
-14.15	4.19377	6.9332e-35
-14.15	4.21453	3.36476e-35
-14.15	4.23529	1.62748e-35
-14.15	4.25606	7.84536e-36
-14.15	4.27682	3.7692e-36
-14.15	4.29758	1.80478e-36
-14.15	4.31834	8.61264e-37
-14.15	4.3391	4.09625e-37
-14.15	4.35986	1.94166e-37
-14.15	4.38062	9.17272e-38
-14.15	4.40138	4.31876e-38
-14.15	4.42215	2.02655e-38
-14.15	4.44291	9.47747e-39
-14.15	4.46367	4.41737e-39
-14.15	4.48443	2.05197e-39
-14.15	4.50519	9.49982e-40
-14.15	4.52595	4.38324e-40
-14.15	4.54671	2.01563e-40
-14.15	4.56747	9.23767e-41
-14.15	4.58824	4.21939e-41
-14.15	4.609	1.92076e-41
-14.15	4.62976	8.71427e-42
-14.15	4.65052	3.94026e-42
-14.15	4.67128	1.77564e-42
-14.15	4.69204	7.97477e-43
-14.15	4.7128	3.56958e-43
-14.15	4.73356	1.5924e-43
-14.15	4.75433	7.0798e-44
-14.15	4.77509	3.13708e-44
-14.15	4.79585	1.38536e-44
-14.15	4.81661	6.0973e-45
-14.15	4.83737	2.67452e-45
-14.15	4.85813	1.1692e-45
-14.15	4.87889	5.09408e-46
-14.15	4.89965	2.21196e-46
-14.15	4.92042	9.57245e-47
-14.15	4.94118	4.1286e-47
-14.15	4.96194	1.77467e-47
-14.15	4.9827	7.60267e-48
-14.15	5.00346	3.246e-48
-14.15	5.02422	1.38123e-48
-14.15	5.04498	5.85753e-49
-14.15	5.06574	2.4757e-49
-14.15	5.08651	1.04284e-49
-14.15	5.10727	4.37791e-50
-14.15	5.12803	1.83169e-50
-14.15	5.14879	7.63782e-51
-14.15	5.16955	3.1741e-51
-14.15	5.19031	1.31463e-51
-14.15	5.21107	5.42653e-52
-14.15	5.23183	2.2324e-52
-14.15	5.2526	9.15284e-53
-14.15	5.27336	3.74e-53
-14.15	5.29412	1.52307e-53
-14.15	5.31488	6.1816e-54
-14.15	5.33564	2.50043e-54
-14.15	5.3564	1.008e-54
[truncated: 249,721+ more rows]

## Sheet: Figure 1n
k (Å-1)	R+α (Å)
-12.45	0	0.000315529
-12.45	0.0241	0.00305
-12.45	0.04819	0.00816
-12.45	0.07229	0.01366
-12.45	0.09639	0.01842
-12.45	0.12048	0.02158
-12.45	0.14458	0.0226
-12.45	0.16868	0.02135
-12.45	0.19277	0.01811
-12.45	0.21687	0.01362
-12.45	0.24096	0.00934
-12.45	0.26506	0.00811
-12.45	0.28916	0.01073
-12.45	0.31325	0.01416
-12.45	0.33735	0.01671
-12.45	0.36145	0.0179
-12.45	0.38554	0.01775
-12.45	0.40964	0.01661
-12.45	0.43374	0.01497
-12.45	0.45783	0.01346
-12.45	0.48193	0.01258
-12.45	0.50602	0.01252
-12.45	0.53012	0.01306
-12.45	0.55422	0.01379
-12.45	0.57831	0.01443
-12.45	0.60241	0.01484
-12.45	0.62651	0.01496
-12.45	0.6506	0.01483
-12.45	0.6747	0.01448
-12.45	0.6988	0.01396
-12.45	0.72289	0.01331
-12.45	0.74699	0.01256
-12.45	0.77108	0.01172
-12.45	0.79518	0.01082
-12.45	0.81928	0.00988
-12.45	0.84337	0.00893
-12.45	0.86747	0.00799
-12.45	0.89157	0.00708
-12.45	0.91566	0.0062
-12.45	0.93976	0.00539
-12.45	0.96386	0.00463
-12.45	0.98795	0.00395
-12.45	1.01205	0.00333
-12.45	1.03615	0.00279
-12.45	1.06024	0.00231
-12.45	1.08434	0.0019
-12.45	1.10843	0.00155
-12.45	1.13253	0.00125
-12.45	1.15663	0.000998871
-12.45	1.18072	0.000792659
-12.45	1.20482	0.000623844
-12.45	1.22892	0.00048706
-12.45	1.25301	0.000377334
-12.45	1.27711	0.000290167
-12.45	1.30121	0.000221568
-12.45	1.3253	0.000168067
-12.45	1.3494	0.000126698
-12.45	1.37349	9.49701e-05
-12.45	1.39759	7.08227e-05
-12.45	1.42169	5.25748e-05
-12.45	1.44578	3.88748e-05
-12.45	1.46988	2.86494e-05
-12.45	1.49398	2.10568e-05
-12.45	1.51807	1.54439e-05
-12.45	1.54217	1.13097e-05
-12.45	1.56627	8.2732e-06
-12.45	1.59036	6.04763e-06
-12.45	1.61446	4.41863e-06
-12.45	1.63855	3.22718e-06
-12.45	1.66265	2.35602e-06
-12.45	1.68675	1.71903e-06
-12.45	1.71084	1.25322e-06
-12.45	1.73494	9.12564e-07
-12.45	1.75904	6.63484e-07
-12.45	1.78313	4.81455e-07
-12.45	1.80723	3.48555e-07
-12.45	1.83133	2.51662e-07
-12.45	1.85542	1.81155e-07
-12.45	1.87952	1.29971e-07
-12.45	1.90361	9.29165e-08
-12.45	1.92771	6.61768e-08
-12.45	1.95181	4.69476e-08
-12.45	1.9759	3.31711e-08
-12.45	2	2.33403e-08
-12.45	2.0241	1.6354e-08
-12.45	2.04819	1.14102e-08
-12.45	2.07229	7.92704e-09
-12.45	2.09639	5.48367e-09
-12.45	2.12048	3.7773e-09
-12.45	2.14458	2.59089e-09
-12.45	2.16868	1.76965e-09
-12.45	2.19277	1.20369e-09
-12.45	2.21687	8.15356e-10
-12.45	2.24096	5.50053e-10
-12.45	2.26506	3.69579e-10
-12.45	2.28916	2.4733e-10
-12.45	2.31325	1.64866e-10
-12.45	2.33735	1.0947e-10
-12.45	2.36145	7.24077e-11
-12.45	2.38554	4.77113e-11
-12.45	2.40964	3.13201e-11
-12.45	2.43374	2.04836e-11
-12.45	2.45783	1.33471e-11
-12.45	2.48193	8.6652e-12
-12.45	2.50602	5.60529e-12
-12.45	2.53012	3.6129e-12
-12.45	2.55422	2.32041e-12
-12.45	2.57831	1.48502e-12
-12.45	2.60241	9.47048e-13
-12.45	2.62651	6.0185e-13
-12.45	2.6506	3.81145e-13
-12.45	2.6747	2.40538e-13
-12.45	2.6988	1.51277e-13
-12.45	2.72289	9.48126e-14
-12.45	2.74699	5.92195e-14
-12.45	2.77108	3.68615e-14
-12.45	2.79518	2.28662e-14
-12.45	2.81928	1.41361e-14
-12.45	2.84337	8.7093e-15
-12.45	2.86747	5.34756e-15
-12.45	2.89157	3.27226e-15
-12.45	2.91566	1.99554e-15
-12.45	2.93976	1.21282e-15
-12.45	2.96386	7.34604e-16
-12.45	2.98795	4.43438e-16
-12.45	3.01205	2.66769e-16
-12.45	3.03615	1.59941e-16
-12.45	3.06024	9.55668e-17
-12.45	3.08434	5.69084e-17
-12.45	3.10843	3.37728e-17
-12.45	3.13253	1.99747e-17
-12.45	3.15663	1.17737e-17
-12.45	3.18072	6.91621e-18
-12.45	3.20482	4.04897e-18
-12.45	3.22892	2.36233e-18
-12.45	3.25301	1.3736e-18
-12.45	3.27711	7.95974e-19
-12.45	3.30121	4.59685e-19
-12.45	3.3253	2.64573e-19
-12.45	3.3494	1.51759e-19
-12.45	3.37349	8.67533e-20
-12.45	3.39759	4.94249e-20
-12.45	3.42169	2.8063e-20
-12.45	3.44578	1.58801e-20
-12.45	3.46988	8.95586e-21
-12.45	3.49398	5.03382e-21
-12.45	3.51807	2.81987e-21
-12.45	3.54217	1.57436e-21
-12.45	3.56627	8.76055e-22
-12.45	3.59036	4.85862e-22
-12.45	3.61446	2.68569e-22
-12.45	3.63855	1.47968e-22
-12.45	3.66265	8.12559e-23
-12.45	3.68675	4.4476e-23
-12.45	3.71084	2.42655e-23
-12.45	3.73494	1.31964e-23
-12.45	3.75904	7.15375e-24
-12.45	3.78313	3.86578e-24
-12.45	3.80723	2.08245e-24
-12.45	3.83133	1.11831e-24
-12.45	3.85542	5.98702e-25
-12.45	3.87952	3.19548e-25
-12.45	3.90361	1.7004e-25
-12.45	3.92771	9.02137e-26
-12.45	3.95181	4.77216e-26
-12.45	3.9759	2.51707e-26
-12.45	4	1.32382e-26
-12.45	4.0241	6.94278e-27
-12.45	4.04819	3.63098e-27
-12.45	4.07229	1.89372e-27
-12.45	4.09639	9.84972e-28
-12.45	4.12048	5.10934e-28
-12.45	4.14458	2.64332e-28
-12.45	4.16868	1.36394e-28
-12.45	4.19277	7.01952e-29
-12.45	4.21687	3.60329e-29
-12.45	4.24096	1.84492e-29
-12.45	4.26506	9.42213e-30
-12.45	4.28916	4.79974e-30
-12.45	4.31325	2.43885e-30
-12.45	4.33735	1.23609e-30
-12.45	4.36145	6.24907e-31
-12.45	4.38554	3.15117e-31
-12.45	4.40964	1.58494e-31
-12.45	4.43374	7.95121e-32
-12.45	4.45783	3.97852e-32
-12.45	4.48193	1.98548e-32
-12.45	4.50602	9.88213e-33
-12.45	4.53012	4.90529e-33
-12.45	4.55422	2.42824e-33
-12.45	4.57831	1.19871e-33
-12.45	4.60241	5.90084e-34
-12.45	4.62651	2.89651e-34
-12.45	4.6506	1.41769e-34
-12.45	4.6747	6.91845e-35
-12.45	4.6988	3.36624e-35
-12.45	4.72289	1.63294e-35
-12.45	4.74699	7.8971e-36
-12.45	4.77108	3.80733e-36
-12.45	4.79518	1.82983e-36
-12.45	4.81928	8.76647e-37
-12.45	4.84337	4.18645e-37
-12.45	4.86747	1.99279e-37
-12.45	4.89157	9.45489e-38
-12.45	4.91566	4.47114e-38
-12.45	4.93976	2.10735e-38
-12.45	4.96386	9.89913e-39
-12.45	4.98795	4.63438e-39
-12.45	5.01205	2.16227e-39
-12.45	5.03615	1.00541e-39
-12.45	5.06024	4.65887e-40
-12.45	5.08434	2.15138e-40
-12.45	5.10843	9.90023e-41
-12.45	5.13253	4.54002e-41
-12.45	5.15663	2.07467e-41
-12.45	5.18072	9.4474e-42
-12.45	5.20482	4.28691e-42
-12.45	5.22892	1.93839e-42
-12.45	5.25301	8.73364e-43
-12.45	5.27711	3.92109e-43
-12.45	5.30121	1.75416e-43
-12.45	5.3253	7.81956e-44
-12.45	5.3494	3.4733e-44
-12.45	5.37349	1.53725e-44
-12.45	5.39759	6.7794e-45
-12.45	5.42169	2.97905e-45
-12.45	5.44578	1.30437e-45
-12.45	5.46988	5.69068e-46
-12.45	5.49398	2.47379e-46
-12.45	5.51807	1.07151e-46
-12.45	5.54217	4.62446e-47
-12.45	5.56627	1.98866e-47
-12.45	5.59036	8.52104e-48
-12.45	5.61446	3.63795e-48
-12.45	5.63855	1.54758e-48
-12.45	5.66265	6.55961e-49
-12.45	5.68675	2.77036e-49
-12.45	5.71084	1.1658e-49
-12.45	5.73494	4.88812e-50
-12.45	5.75904	2.04217e-50
-12.45	5.78313	8.50101e-51
-12.45	5.80723	3.52599e-51
-12.45	5.83133	1.45721e-51
-12.45	5.85542	6.00059e-52
-12.45	5.87952	2.46205e-52
-12.45	5.90361	1.00654e-52
-12.45	5.92771	4.10013e-53
-12.45	5.95181	1.66416e-53
-12.45	5.9759	6.73018e-54
-12.45	6	2.712e-54
-12.4	0	0.00031553
-12.4	0.0241	0.00305
-12.4	0.04819	0.00816
-12.4	0.07229	0.01366
-12.4	0.09639	0.01843
-12.4	0.12048	0.02159
-12.4	0.14458	0.02262
-12.4	0.16868	0.02137
-12.4	0.19277	0.01813
-12.4	0.21687	0.01363
-12.4	0.24096	0.00935
-12.4	0.26506	0.00811
-12.4	0.28916	0.01074
-12.4	0.31325	0.0142
-12.4	0.33735	0.01677
-12.4	0.36145	0.01797
-12.4	0.38554	0.01783
-12.4	0.40964	0.01669
-12.4	0.43374	0.01505
-12.4	0.45783	0.01353
-12.4	0.48193	0.01265
-12.4	0.50602	0.01259
-12.4	0.53012	0.01314
-12.4	0.55422	0.0139
-12.4	0.57831	0.01456
-12.4	0.60241	0.01498
-12.4	0.62651	0.01512
-12.4	0.6506	0.015
-12.4	0.6747	0.01466
-12.4	0.6988	0.01415
-12.4	0.72289	0.01351
-12.4	0.74699	0.01275
-12.4	0.77108	0.01191
-12.4	0.79518	0.01101
-12.4	0.81928	0.01007
-12.4	0.84337	0.00912
-12.4	0.86747	0.00817
-12.4	0.89157	0.00724
-12.4	0.91566	0.00636
-12.4	0.93976	0.00553
-12.4	0.96386	0.00476
-12.4	0.98795	0.00406
-12.4	1.01205	0.00343
-12.4	1.03615	0.00288
-12.4	1.06024	0.00239
-12.4	1.08434	0.00196
-12.4	1.10843	0.0016
-12.4	1.13253	0.0013
-12.4	1.15663	0.00104
-12.4	1.18072	0.000825349
-12.4	1.20482	0.000650626
-12.4	1.22892	0.0005088
-12.4	1.25301	0.000394827
-12.4	1.27711	0.000304122
-12.4	1.30121	0.00023261
-12.4	1.3253	0.000176736
-12.4	1.3494	0.000133455
-12.4	1.37349	0.000100202
-12.4	1.39759	7.48483e-05
-12.4	1.42169	5.56553e-05
-12.4	1.44578	4.12206e-05
-12.4	1.46988	3.04284e-05
-12.4	1.49398	2.24013e-05
-12.4	1.51807	1.64574e-05
-12.4	1.54217	1.20721e-05
-12.4	1.56627	8.84592e-06
-12.4	1.59036	6.47749e-06
-12.4	1.61446	4.74111e-06
-12.4	1.63855	3.46904e-06
-12.4	1.66265	2.53736e-06
-12.4	1.68675	1.85496e-06
-12.4	1.71084	1.35504e-06
-12.4	1.73494	9.88768e-07
-12.4	1.75904	7.20434e-07
-12.4	1.78313	5.23938e-07
-12.4	1.80723	3.80173e-07
-12.4	1.83133	2.75129e-07
-12.4	1.85542	1.98518e-07
-12.4	1.87952	1.42772e-07
-12.4	1.90361	1.0232e-07
-12.4	1.92771	7.30557e-08
-12.4	1.95181	5.19588e-08
-12.4	1.9759	3.68058e-08
-12.4	2	2.59649e-08
-12.4	2.0241	1.82406e-08
-12.4	2.04819	1.27602e-08
-12.4	2.07229	8.88854e-09
-12.4	2.09639	6.16536e-09
-12.4	2.12048	4.25839e-09
-12.4	2.14458	2.92887e-09
-12.4	2.16868	2.00603e-09
-12.4	2.19277	1.36827e-09
-12.4	2.21687	9.29435e-10
-12.4	2.24096	6.28786e-10
-12.4	2.26506	4.23684e-10
-12.4	2.28916	2.84353e-10
-12.4	2.31325	1.90094e-10
-12.4	2.33735	1.2659e-10
-12.4	2.36145	8.39781e-11
-12.4	2.38554	5.54997e-11
-12.4	2.40964	3.65418e-11
-12.4	2.43374	2.39708e-11
-12.4	2.45783	1.56669e-11
-12.4	2.48193	1.02025e-11
-12.4	2.50602	6.62018e-12
-12.4	2.53012	4.28038e-12
-12.4	2.55422	2.75777e-12
-12.4	2.57831	1.77054e-12
-12.4	2.60241	1.13275e-12
-12.4	2.62651	7.22191e-13
-12.4	2.6506	4.58848e-13
-12.4	2.6747	2.90529e-13
-12.4	2.6988	1.83324e-13
-12.4	2.72289	1.15283e-13
-12.4	2.74699	7.22482e-14
-12.4	2.77108	4.51245e-14
-12.4	2.79518	2.80882e-14
-12.4	2.81928	1.74246e-14
-12.4	2.84337	1.07729e-14
-12.4	2.86747	6.63794e-15
-12.4	2.89157	4.07631e-15
-12.4	2.91566	2.4948e-15
-12.4	2.93976	1.52173e-15
-12.4	2.96386	9.25075e-16
-12.4	2.98795	5.60468e-16
-12.4	3.01205	3.38423e-16
-12.4	3.03615	2.0366e-16
-12.4	3.06024	1.22148e-16
-12.4	3.08434	7.30133e-17
-12.4	3.10843	4.34964e-17
-12.4	3.13253	2.58249e-17
-12.4	3.15663	1.52813e-17
-12.4	3.18072	9.01185e-18
-12.4	3.20482	5.29667e-18
-12.4	3.22892	3.1026e-18
-12.4	3.25301	1.81127e-18
-12.4	3.27711	1.05384e-18
-12.4	3.30121	6.11086e-19
-12.4	3.3253	3.53155e-19
-12.4	3.3494	2.03406e-19
-12.4	3.37349	1.16762e-19
-12.4	3.39759	6.68003e-20
-12.4	3.42169	3.80887e-20
-12.4	3.44578	2.1645e-20
-12.4	3.46988	1.22593e-20
-12.4	3.49398	6.92028e-21
-12.4	3.51807	3.89345e-21
-12.4	3.54217	2.18325e-21
-12.4	3.56627	1.2202e-21
-12.4	3.59036	6.79719e-22
-12.4	3.61446	3.77398e-22
-12.4	3.63855	2.08857e-22
-12.4	3.66265	1.15209e-22
-12.4	3.68675	6.33456e-23
-12.4	3.71084	3.47177e-23
-12.4	3.73494	1.89669e-23
-12.4	3.75904	1.03292e-23
-12.4	3.78313	5.60751e-24
-12.4	3.80723	3.03471e-24
-12.4	3.83133	1.63728e-24
-12.4	3.85542	8.80641e-25
-12.4	3.87952	4.72236e-25
-12.4	3.90361	2.52474e-25
-12.4	3.92771	1.34582e-25
-12.4	3.95181	7.153e-26
-12.4	3.9759	3.79081e-26
-12.4	4	2.00325e-26
-12.4	4.0241	1.05564e-26
-12.4	4.04819	5.54737e-27
-12.4	4.07229	2.90714e-27
-12.4	4.09639	1.51938e-27
-12.4	4.12048	7.91961e-28
-12.4	4.14458	4.11711e-28
-12.4	4.16868	2.13473e-28
-12.4	4.19277	1.104e-28
-12.4	4.21687	5.6948e-29
-12.4	4.24096	2.93009e-29
-12.4	4.26506	1.50377e-29
-12.4	4.28916	7.69814e-30
-12.4	4.31325	3.93094e-30
-12.4	4.33735	2.00223e-30
-12.4	4.36145	1.01727e-30
-12.4	4.38554	5.15536e-31
-12.4	4.40964	2.60603e-31
-12.4	4.43374	1.31397e-31
-12.4	4.45783	6.60803e-32
-12.4	4.48193	3.31456e-32
-12.4	4.50602	1.65819e-32
-12.4	4.53012	8.27339e-33
-12.4	4.55422	4.11679e-33
-12.4	4.57831	2.04289e-33
-12.4	4.60241	1.01093e-33
-12.4	4.62651	4.98859e-34
-12.4	4.6506	2.45465e-34
-12.4	4.6747	1.20433e-34
-12.4	4.6988	5.89143e-35
-12.4	4.72289	2.87345e-35
-12.4	4.74699	1.39725e-35
-12.4	4.77108	6.77355e-36
-12.4	4.79518	3.27351e-36
-12.4	4.81928	1.57707e-36
-12.4	4.84337	7.57379e-37
-12.4	4.86747	3.62565e-37
-12.4	4.89157	1.73003e-37
-12.4	4.91566	8.22824e-38
-12.4	4.93976	3.90059e-38
-12.4	4.96386	1.84296e-38
-12.4	4.98795	8.67858e-39
-12.4	5.01205	4.07307e-39
-12.4	5.03615	1.90513e-39
-12.4	5.06024	8.88078e-40
-12.4	5.08434	4.12563e-40
-12.4	5.10843	1.91001e-40
-12.4	5.13253	8.81214e-41
-12.4	5.15663	4.05154e-41
-12.4	5.18072	1.8563e-41
-12.4	5.20482	8.47536e-42
-12.4	5.22892	3.85609e-42
-12.4	5.25301	1.74827e-42
-12.4	5.27711	7.89845e-43
-12.4	5.30121	3.55583e-43
-12.4	5.3253	1.59516e-43
-12.4	5.3494	7.13063e-44
-12.4	5.37349	3.17622e-44
-12.4	5.39759	1.40977e-44
-12.4	5.42169	6.23505e-45
-12.4	5.44578	2.7478e-45
-12.4	5.46988	1.20665e-45
-12.4	5.49398	5.27988e-46
-12.4	5.51807	2.30206e-46
-12.4	5.54217	1.00013e-46
-12.4	5.56627	4.32956e-47
-12.4	5.59036	1.86757e-47
-12.4	5.61446	8.02699e-48
-12.4	5.63855	3.43775e-48
-12.4	5.66265	1.46704e-48
-12.4	5.68675	6.23807e-49
-12.4	5.71084	2.64304e-49
-12.4	5.73494	1.11584e-49
-12.4	5.75904	4.69398e-50
-12.4	5.78313	1.96755e-50
-12.4	5.80723	8.21774e-51
-12.4	5.83133	3.41998e-51
-12.4	5.85542	1.4182e-51
-12.4	5.87952	5.85999e-52
-12.4	5.90361	2.41268e-52
-12.4	5.92771	9.89799e-53
-12.4	5.95181	4.04612e-53
-12.4	5.9759	1.64807e-53
-12.4	6	6.68894e-54
-12.35	0	0.000315531
-12.35	0.0241	0.00305
-12.35	0.04819	0.00816
-12.35	0.07229	0.01367
-12.35	0.09639	0.01844
-12.35	0.12048	0.0216
-12.35	0.14458	0.02264
-12.35	0.16868	0.02139
-12.35	0.19277	0.01815
-12.35	0.21687	0.01365
-12.35	0.24096	0.00936
-12.35	0.26506	0.00811
-12.35	0.28916	0.01076
-12.35	0.31325	0.01423
-12.35	0.33735	0.01682
-12.35	0.36145	0.01804
-12.35	0.38554	0.01791
-12.35	0.40964	0.01677
-12.35	0.43374	0.01513
-12.35	0.45783	0.0136
-12.35	0.48193	0.01271
-12.35	0.50602	0.01266
-12.35	0.53012	0.01322
-12.35	0.55422	0.014
-12.35	0.57831	0.01468
-12.35	0.60241	0.01512
-12.35	0.62651	0.01528
-12.35	0.6506	0.01517
-12.35	0.6747	0.01485
-12.35	0.6988	0.01435
-12.35	0.72289	0.01371
-12.35	0.74699	0.01295
-12.35	0.77108	0.01212
-12.35	0.79518	0.01121
-12.35	0.81928	0.01027
-12.35	0.84337	0.0093
-12.35	0.86747	0.00834
-12.35	0.89157	0.00741
-12.35	0.91566	0.00651
-12.35	0.93976	0.00567
-12.35	0.96386	0.00489
-12.35	0.98795	0.00418
-12.35	1.01205	0.00354
-12.35	1.03615	0.00297
-12.35	1.06024	0.00247
-12.35	1.08434	0.00203
-12.35	1.10843	0.00166
-12.35	1.13253	0.00134
-12.35	1.15663	0.00108
-12.35	1.18072	0.000859274
-12.35	1.20482	0.000678465
-12.35	1.22892	0.000531437
-12.35	1.25301	0.000413071
-12.35	1.27711	0.0003187
-12.35	1.30121	0.000244164
-12.35	1.3253	0.000185822
-12.35	1.3494	0.000140549
-12.35	1.37349	0.000105704
-12.35	1.39759	7.90887e-05
-12.35	1.42169	5.89055e-05
-12.35	1.44578	4.36997e-05
-12.35	1.46988	3.23115e-05
-12.35	1.49398	2.38269e-05
-12.35	1.51807	1.75336e-05
-12.35	1.54217	1.2883e-05
-12.35	1.56627	9.45609e-06
-12.35	1.59036	6.93623e-06
-12.35	1.61446	5.08584e-06
-12.35	1.63855	3.72804e-06
-12.35	1.66265	2.73192e-06
-12.35	1.68675	2.00106e-06
-12.35	1.71084	1.46471e-06
-12.35	1.73494	1.07101e-06
-12.35	1.75904	7.82024e-07
-12.35	1.78313	5.69983e-07
-12.35	1.80723	4.14519e-07
-12.35	1.83133	3.0068e-07
-12.35	1.85542	2.17467e-07
-12.35	1.87952	1.56778e-07
-12.35	1.90361	1.12632e-07
-12.35	1.92771	8.0619e-08
-12.35	1.95181	5.74825e-08
-12.35	1.9759	4.08227e-08
-12.35	2	2.88729e-08
-12.35	2.0241	2.03365e-08
-12.35	2.04819	1.42638e-08
-12.35	2.07229	9.96237e-09
-12.35	2.09639	6.92874e-09
-12.35	2.12048	4.7986e-09
-12.35	2.14458	3.30943e-09
-12.35	2.16868	2.27291e-09
-12.35	2.19277	1.5546e-09
-12.35	2.21687	1.05896e-09
-12.35	2.24096	7.18432e-10
-12.35	2.26506	4.85464e-10
-12.35	2.28916	3.26749e-10
-12.35	2.31325	2.19067e-10
-12.35	2.33735	1.46308e-10
-12.35	2.36145	9.7344e-11
-12.35	2.38554	6.45232e-11
-12.35	2.40964	4.26097e-11
-12.35	2.43374	2.80353e-11
-12.35	2.45783	1.8379e-11
-12.35	2.48193	1.20053e-11
-12.35	2.50602	7.814e-12
-12.35	2.53012	5.06799e-12
-12.35	2.55422	3.27545e-12
-12.35	2.57831	2.10956e-12
-12.35	2.60241	1.35396e-12
-12.35	2.62651	8.66007e-13
-12.35	2.6506	5.5201e-13
-12.35	2.6747	3.50662e-13
-12.35	2.6988	2.22e-13
-12.35	2.72289	1.40069e-13
-12.35	2.74699	8.80776e-14
-12.35	2.77108	5.51979e-14
-12.35	2.79518	3.44761e-14
-12.35	2.81928	2.14612e-14
-12.35	2.84337	1.33148e-14
-12.35	2.86747	8.23298e-15
-12.35	2.89157	5.07372e-15
-12.35	2.91566	3.11633e-15
-12.35	2.93976	1.90769e-15
-12.35	2.96386	1.16392e-15
-12.35	2.98795	7.07755e-16
-12.35	3.01205	4.28937e-16
-12.35	3.03615	2.59091e-16
-12.35	3.06024	1.55977e-16
-12.35	3.08434	9.35873e-17
-12.35	3.10843	5.59656e-17
-12.35	3.13253	3.3356e-17
-12.35	3.15663	1.98141e-17
-12.35	3.18072	1.17306e-17
-12.35	3.20482	6.92175e-18
-12.35	3.22892	4.0706e-18
-12.35	3.25301	2.38588e-18
-12.35	3.27711	1.39375e-18
-12.35	3.30121	8.11466e-19
-12.35	3.3253	4.70873e-19
-12.35	3.3494	2.72325e-19
-12.35	3.37349	1.56972e-19
-12.35	3.39759	9.01796e-20
-12.35	3.42169	5.16355e-20
-12.35	3.44578	2.94676e-20
-12.35	3.46988	1.6761e-20
-12.35	3.49398	9.50207e-21
-12.35	3.51807	5.36909e-21
-12.35	3.54217	3.0238e-21
-12.35	3.56627	1.69738e-21
-12.35	3.59036	9.49694e-22
-12.35	3.61446	5.2963e-22
-12.35	3.63855	2.9441e-22
-12.35	3.66265	1.63129e-22
-12.35	3.68675	9.00979e-23
-12.35	3.71084	4.96035e-23
-12.35	3.73494	2.72228e-23
-12.35	3.75904	1.48931e-23
-12.35	3.78313	8.12233e-24
-12.35	3.80723	4.41602e-24
-12.35	3.83133	2.39358e-24
-12.35	3.85542	1.29343e-24
-12.35	3.87952	6.96836e-25
-12.35	3.90361	3.74304e-25
-12.35	3.92771	2.00465e-25
-12.35	3.95181	1.07051e-25
-12.35	3.9759	5.7002e-26
-12.35	4	3.02661e-26
-12.35	4.0241	1.60253e-26
-12.35	4.04819	8.46159e-27
-12.35	4.07229	4.45565e-27
-12.35	4.09639	2.3399e-27
-12.35	4.12048	1.22554e-27
-12.35	4.14458	6.40192e-28
-12.35	4.16868	3.33551e-28
-12.35	4.19277	1.73338e-28
-12.35	4.21687	8.98494e-29
-12.35	4.24096	4.64552e-29
-12.35	4.26506	2.39585e-29
-12.35	4.28916	1.23252e-29
-12.35	4.31325	6.3247e-30
-12.35	4.33735	3.23743e-30
-12.35	4.36145	1.65301e-30
-12.35	4.38554	8.41897e-31
-12.35	4.40964	4.27709e-31
-12.35	4.43374	2.16738e-31
-12.35	4.45783	1.0955e-31
-12.35	4.48193	5.5229e-32
-12.35	4.50602	2.77709e-32
-12.35	4.53012	1.39273e-32
-12.35	4.55422	6.96597e-33
-12.35	4.57831	3.47473e-33
-12.35	4.60241	1.72849e-33
-12.35	4.62651	8.57443e-34
-12.35	4.6506	4.24147e-34
-12.35	4.6747	2.09211e-34
-12.35	4.6988	1.02894e-34
-12.35	4.72289	5.04569e-35
-12.35	4.74699	2.46691e-35
-12.35	4.77108	1.20247e-35
-12.35	4.79518	5.84344e-36
-12.35	4.81928	2.83086e-36
-12.35	4.84337	1.36713e-36
-12.35	4.86747	6.58154e-37
-12.35	4.89157	3.15834e-37
-12.35	4.91566	1.51074e-37
-12.35	4.93976	7.20292e-38
-12.35	4.96386	3.42298e-38
-12.35	4.98795	1.62131e-38
-12.35	5.01205	7.65389e-39
-12.35	5.03615	3.60118e-39
-12.35	5.06024	1.68867e-39
-12.35	5.08434	7.89179e-40
-12.35	5.10843	3.67559e-40
-12.35	5.13253	1.70606e-40
-12.35	5.15663	7.89169e-41
-12.35	5.18072	3.63788e-41
-12.35	5.20482	1.67119e-41
-12.35	5.22892	7.65059e-42
-12.35	5.25301	3.49022e-42
-12.35	5.27711	1.5867e-42
-12.35	5.30121	7.18818e-43
-12.35	5.3253	3.24504e-43
-12.35	5.3494	1.45981e-43
-12.35	5.37349	6.54402e-44
-12.35	5.39759	2.92323e-44
-12.35	5.42169	1.30122e-44
-12.35	5.44578	5.77167e-45
-12.35	5.46988	2.55104e-45
-12.35	5.49398	1.12356e-45
-12.35	5.51807	4.93103e-46
-12.35	5.54217	2.15645e-46
-12.35	5.56627	9.39725e-47
-12.35	5.59036	4.08057e-47
-12.35	5.61446	1.76563e-47
-12.35	5.63855	7.61264e-48
-12.35	5.66265	3.27061e-48
-12.35	5.68675	1.40016e-48
-12.35	5.71084	5.9729e-49
-12.35	5.73494	2.53892e-49
-12.35	5.75904	1.0754e-49
-12.35	5.78313	4.53883e-50
-12.35	5.80723	1.90887e-50
-12.35	5.83133	7.99954e-51
-12.35	5.85542	3.34049e-51
-12.35	5.87952	1.38999e-51
-12.35	5.90361	5.76329e-52
-12.35	5.92771	2.38114e-52
-12.35	5.95181	9.80299e-53
-12.35	5.9759	4.02151e-53
-12.35	6	1.64391e-53
-12.3	0	0.000315532
-12.3	0.0241	0.00305
-12.3	0.04819	0.00816
-12.3	0.07229	0.01367
-12.3	0.09639	0.01844
-12.3	0.12048	0.02162
-12.3	0.14458	0.02265
-12.3	0.16868	0.02141
-12.3	0.19277	0.01817
-12.3	0.21687	0.01367
-12.3	0.24096	0.00937
-12.3	0.26506	0.00812
-12.3	0.28916	0.01077
-12.3	0.31325	0.01427
-12.3	0.33735	0.01688
-12.3	0.36145	0.01811
-12.3	0.38554	0.01799
-12.3	0.40964	0.01685
-12.3	0.43374	0.0152
-12.3	0.45783	0.01367
-12.3	0.48193	0.01278
-12.3	0.50602	0.01273
-12.3	0.53012	0.01331
-12.3	0.55422	0.01411
-12.3	0.57831	0.01481
-12.3	0.60241	0.01527
-12.3	0.62651	0.01544
-12.3	0.6506	0.01535
-12.3	0.6747	0.01503
-12.3	0.6988	0.01454
-12.3	0.72289	0.01391
-12.3	0.74699	0.01316
-12.3	0.77108	0.01232
-12.3	0.79518	0.01141
-12.3	0.81928	0.01046
-12.3	0.84337	0.00949
-12.3	0.86747	0.00852
-12.3	0.89157	0.00758
-12.3	0.91566	0.00667
-12.3	0.93976	0.00581
-12.3	0.96386	0.00502
-12.3	0.98795	0.0043
-12.3	1.01205	0.00364
-12.3	1.03615	0.00306
-12.3	1.06024	0.00255
-12.3	1.08434	0.0021
-12.3	1.10843	0.00172
-12.3	1.13253	0.0014
-12.3	1.15663	0.00112
-12.3	1.18072	0.000894477
-12.3	1.20482	0.0007074
-12.3	1.22892	0.000555004
-12.3	1.25301	0.000432095
-12.3	1.27711	0.000333927
-12.3	1.30121	0.000256252
-12.3	1.3253	0.000195345
-12.3	1.3494	0.000147997
-12.3	1.37349	0.000111488
-12.3	1.39759	8.35546e-05
-12.3	1.42169	6.23341e-05
-12.3	1.44578	4.63192e-05
-12.3	1.46988	3.43045e-05
-12.3	1.49398	2.5338e-05
-12.3	1.51807	1.86763e-05
-12.3	1.54217	1.37453e-05
-12.3	1.56627	1.0106e-05
-12.3	1.59036	7.42566e-06
-12.3	1.61446	5.45426e-06
-12.3	1.63855	4.00532e-06
-12.3	1.66265	2.94058e-06
-12.3	1.68675	2.15806e-06
-12.3	1.71084	1.58277e-06
-12.3	1.73494	1.15973e-06
-12.3	1.75904	8.48609e-07
-12.3	1.78313	6.1987e-07
-12.3	1.80723	4.51815e-07
-12.3	1.83133	3.2849e-07
-12.3	1.85542	2.38141e-07
-12.3	1.87952	1.72094e-07
-12.3	1.90361	1.23938e-07
-12.3	1.92771	8.89313e-08
-12.3	1.95181	6.35688e-08
-12.3	1.9759	4.52598e-08
-12.3	2	3.20936e-08
-12.3	2.0241	2.26637e-08
-12.3	2.04819	1.59379e-08
-12.3	2.07229	1.11611e-08
-12.3	2.09639	7.78321e-09
-12.3	2.12048	5.40491e-09
-12.3	2.14458	3.73772e-09
-12.3	2.16868	2.5741e-09
-12.3	2.19277	1.76547e-09
-12.3	2.21687	1.20595e-09
-12.3	2.24096	8.20452e-10
-12.3	2.26506	5.5597e-10
-12.3	2.28916	3.75272e-10
-12.3	2.31325	2.52323e-10
-12.3	2.33735	1.69008e-10
-12.3	2.36145	1.12775e-10
-12.3	2.38554	7.49719e-11
-12.3	2.40964	4.9657e-11
-12.3	2.43374	3.277e-11
-12.3	2.45783	2.15478e-11
-12.3	2.48193	1.41181e-11
-12.3	2.50602	9.2174e-12
-12.3	2.53012	5.99674e-12
-12.3	2.55422	3.88783e-12
-12.3	2.57831	2.51185e-12
-12.3	2.60241	1.61729e-12
-12.3	2.62651	1.03776e-12
-12.3	2.6506	6.63627e-13
-12.3	2.6747	4.22943e-13
-12.3	2.6988	2.68642e-13
-12.3	2.72289	1.70061e-13
-12.3	2.74699	1.07295e-13
-12.3	2.77108	6.74688e-14
-12.3	2.79518	4.22841e-14
-12.3	2.81928	2.64122e-14
-12.3	2.84337	1.64432e-14
-12.3	2.86747	1.0203e-14
-12.3	2.89157	6.30996e-15
-12.3	2.91566	3.88943e-15
-12.3	2.93976	2.38949e-15
-12.3	2.96386	1.46314e-15
-12.3	2.98795	8.92956e-16
-12.3	3.01205	5.43169e-16
-12.3	3.03615	3.29308e-16
-12.3	3.06024	1.98989e-16
-12.3	3.08434	1.19845e-16
-12.3	3.10843	7.19401e-17
-12.3	3.13253	4.30411e-17
-12.3	3.15663	2.56659e-17
-12.3	3.18072	1.52542e-17
-12.3	3.20482	9.03616e-18
-12.3	3.22892	5.33505e-18
-12.3	3.25301	3.13945e-18
-12.3	3.27711	1.84132e-18
-12.3	3.30121	1.07638e-18
-12.3	3.3253	6.27137e-19
-12.3	3.3494	3.64186e-19
-12.3	3.37349	2.10788e-19
-12.3	3.39759	1.21601e-19
-12.3	3.42169	6.99183e-20
-12.3	3.44578	4.00696e-20
-12.3	3.46988	2.28882e-20
-12.3	3.49398	1.30311e-20
-12.3	3.51807	7.39482e-21
-12.3	3.54217	4.1827e-21
-12.3	3.56627	2.35815e-21
-12.3	3.59036	1.32518e-21
-12.3	3.61446	7.42295e-22
-12.3	3.63855	4.14458e-22
-12.3	3.66265	2.30671e-22
-12.3	3.68675	1.27974e-22
-12.3	3.71084	7.0774e-23
-12.3	3.73494	3.90175e-23
-12.3	3.75904	2.14431e-23
-12.3	3.78313	1.17482e-23
-12.3	3.80723	6.41675e-24
-12.3	3.83133	3.4941e-24
-12.3	3.85542	1.89689e-24
-12.3	3.87952	1.02672e-24
-12.3	3.90361	5.54082e-25
-12.3	3.92771	2.98143e-25
-12.3	3.95181	1.59963e-25
-12.3	3.9759	8.55794e-26
-12.3	4	4.56554e-26
-12.3	4.0241	2.42887e-26
-12.3	4.04819	1.2886e-26
-12.3	4.07229	6.81791e-27
-12.3	4.09639	3.59764e-27
-12.3	4.12048	1.89335e-27
-12.3	4.14458	9.93811e-28
-12.3	4.16868	5.20297e-28
-12.3	4.19277	2.71696e-28
-12.3	4.21687	1.41517e-28
-12.3	4.24096	7.35258e-29
-12.3	4.26506	3.81049e-29
-12.3	4.28916	1.96987e-29
-12.3	4.31325	1.01582e-29
-12.3	4.33735	5.22533e-30
-12.3	4.36145	2.68122e-30
-12.3	4.38554	1.37237e-30
-12.3	4.40964	7.00683e-31
-12.3	4.43374	3.56846e-31
-12.3	4.45783	1.81276e-31
-12.3	4.48193	9.18521e-32
-12.3	4.50602	4.64213e-32
-12.3	4.53012	2.33998e-32
-12.3	4.55422	1.17641e-32
-12.3	4.57831	5.8985e-33
-12.3	4.60241	2.9495e-33
-12.3	4.62651	1.47082e-33
-12.3	4.6506	7.31407e-34
-12.3	4.6747	3.62686e-34
-12.3	4.6988	1.79332e-34
-12.3	4.72289	8.84142e-35
-12.3	4.74699	4.34618e-35
-12.3	4.77108	2.13009e-35
-12.3	4.79518	1.04082e-35
-12.3	4.81928	5.07022e-36
-12.3	4.84337	2.46227e-36
-12.3	4.86747	1.19203e-36
-12.3	4.89157	5.75267e-37
-12.3	4.91566	2.76737e-37
-12.3	4.93976	1.327e-37
-12.3	4.96386	6.34258e-38
-12.3	4.98795	3.02164e-38
-12.3	5.01205	1.4348e-38
-12.3	5.03615	6.79051e-39
-12.3	5.06024	3.20307e-39
-12.3	5.08434	1.50583e-39
-12.3	5.10843	7.05539e-40
-12.3	5.13253	3.29456e-40
-12.3	5.15663	1.5332e-40
-12.3	5.18072	7.11076e-41
-12.3	5.20482	3.2866e-41
-12.3	5.22892	1.51386e-41
-12.3	5.25301	6.94907e-42
-12.3	5.27711	3.17883e-42
-12.3	5.30121	1.44912e-42
-12.3	5.3253	6.58311e-43
-12.3	5.3494	2.98022e-43
-12.3	5.37349	1.34447e-43
-12.3	5.39759	6.04418e-44
-12.3	5.42169	2.70773e-44
-12.3	5.44578	1.2088e-44
-12.3	5.46988	5.37748e-45
-12.3	5.49398	2.38386e-45
-12.3	5.51807	1.05307e-45
-12.3	5.54217	4.63563e-46
-12.3	5.56627	2.03345e-46
-12.3	5.59036	8.88851e-47
-12.3	5.61446	3.87165e-47
-12.3	5.63855	1.68048e-47
-12.3	5.66265	7.26846e-48
-12.3	5.68675	3.13272e-48
-12.3	5.71084	1.34545e-48
-12.3	5.73494	5.75819e-49
-12.3	5.75904	2.45568e-49
-12.3	5.78313	1.04358e-49
-12.3	5.80723	4.41929e-50
-12.3	5.83133	1.86486e-50
-12.3	5.85542	7.84167e-51
-12.3	5.87952	3.2858e-51
-12.3	5.90361	1.37196e-51
-12.3	5.92771	5.7084e-52
-12.3	5.95181	2.36677e-52
-12.3	5.9759	9.77838e-53
-12.3	6	4.02577e-53
-12.25	0	0.000315532
-12.25	0.0241	0.00305
-12.25	0.04819	0.00816
-12.25	0.07229	0.01367
-12.25	0.09639	0.01845
-12.25	0.12048	0.02163
-12.25	0.14458	0.02267
-12.25	0.16868	0.02143
-12.25	0.19277	0.0182
-12.25	0.21687	0.01369
-12.25	0.24096	0.00938
-12.25	0.26506	0.00812
-12.25	0.28916	0.01079
-12.25	0.31325	0.0143
-12.25	0.33735	0.01693
-12.25	0.36145	0.01818
-12.25	0.38554	0.01807
-12.25	0.40964	0.01693
-12.25	0.43374	0.01528
-12.25	0.45783	0.01373
-12.25	0.48193	0.01284
-12.25	0.50602	0.0128
-12.25	0.53012	0.01339
-12.25	0.55422	0.01421
-12.25	0.57831	0.01494
-12.25	0.60241	0.01541
-12.25	0.62651	0.0156
-12.25	0.6506	0.01552
-12.25	0.6747	0.01522
-12.25	0.6988	0.01474
-12.25	0.72289	0.01411
-12.25	0.74699	0.01336
-12.25	0.77108	0.01253
-12.25	0.79518	0.01162
-12.25	0.81928	0.01066
-12.25	0.84337	0.00969
-12.25	0.86747	0.00871
-12.25	0.89157	0.00775
-12.25	0.91566	0.00683
-12.25	0.93976	0.00596
-12.25	0.96386	0.00516
-12.25	0.98795	0.00442
-12.25	1.01205	0.00375
-12.25	1.03615	0.00316
-12.25	1.06024	0.00263
-12.25	1.08434	0.00217
-12.25	1.10843	0.00178
-12.25	1.13253	0.00145
-12.25	1.15663	0.00117
-12.25	1.18072	0.000931001
-12.25	1.20482	0.00073747
-12.25	1.22892	0.000579534
-12.25	1.25301	0.000451929
-12.25	1.27711	0.000349828
-12.25	1.30121	0.000268897
-12.25	1.3253	0.000205323
-12.25	1.3494	0.000155813
-12.25	1.37349	0.00011757
-12.25	1.39759	8.82571e-05
-12.25	1.42169	6.59503e-05
-12.25	1.44578	4.90864e-05
-12.25	1.46988	3.64132e-05
-12.25	1.49398	2.69394e-05
-12.25	1.51807	1.98892e-05
-12.25	1.54217	1.46622e-05
-12.25	1.56627	1.07981e-05
-12.25	1.59036	7.94772e-06
-12.25	1.61446	5.84789e-06
-12.25	1.63855	4.30209e-06
-12.25	1.66265	3.16431e-06
-12.25	1.68675	2.3267e-06
-12.25	1.71084	1.70985e-06
-12.25	1.73494	1.25541e-06
-12.25	1.75904	9.20569e-07
-12.25	1.78313	6.73902e-07
-12.25	1.80723	4.923e-07
-12.25	1.83133	3.58747e-07
-12.25	1.85542	2.60687e-07
-12.25	1.87952	1.88838e-07
-12.25	1.90361	1.36327e-07
-12.25	1.92771	9.80632e-08
-12.25	1.95181	7.0272e-08
-12.25	1.9759	5.01594e-08
-12.25	2	3.56591e-08
-12.25	2.0241	2.52469e-08
-12.25	2.04819	1.78009e-08
-12.25	2.07229	1.24987e-08
-12.25	2.09639	8.73921e-09
-12.25	2.12048	6.0851e-09
-12.25	2.14458	4.2195e-09
-12.25	2.16868	2.91383e-09
-12.25	2.19277	2.00398e-09
-12.25	2.21687	1.37267e-09
-12.25	2.24096	9.36494e-10
-12.25	2.26506	6.36395e-10
-12.25	2.28916	4.30778e-10
-12.25	2.31325	2.90474e-10
-12.25	2.33735	1.95123e-10
-12.25	2.36145	1.30581e-10
-12.25	2.38554	8.70639e-11
-12.25	2.40964	5.78367e-11
-12.25	2.43374	3.82819e-11
-12.25	2.45783	2.52479e-11
-12.25	2.48193	1.65926e-11
-12.25	2.50602	1.08662e-11
-12.25	2.53012	7.09123e-12
-12.25	2.55422	4.61173e-12
-12.25	2.57831	2.98891e-12
-12.25	2.60241	1.93055e-12
-12.25	2.62651	1.24272e-12
-12.25	2.6506	7.97262e-13
-12.25	2.6747	5.09763e-13
-12.25	2.6988	3.2485e-13
-12.25	2.72289	2.06324e-13
-12.25	2.74699	1.30609e-13
-12.25	2.77108	8.24051e-14
-12.25	2.79518	5.18203e-14
-12.25	2.81928	3.24797e-14
-12.25	2.84337	2.02905e-14
-12.25	2.86747	1.26341e-14
-12.25	2.89157	7.84091e-15
-12.25	2.91566	4.85022e-15
-12.25	2.93976	2.99041e-15
-12.25	2.96386	1.8377e-15
-12.25	2.98795	1.12562e-15
-12.25	3.01205	6.87203e-16
-12.25	3.03615	4.1817e-16
-12.25	3.06024	2.53627e-16
-12.25	3.08434	1.53325e-16
-12.25	3.10843	9.23853e-17
-12.25	3.13253	5.54841e-17
-12.25	3.15663	3.32129e-17
-12.25	3.18072	1.98162e-17
-12.25	3.20482	1.17844e-17
-12.25	3.22892	6.98499e-18
-12.25	3.25301	4.12666e-18
-12.25	3.27711	2.42999e-18
-12.25	3.30121	1.42622e-18
-12.25	3.3253	8.34334e-19
-12.25	3.3494	4.86486e-19
-12.25	3.37349	2.82733e-19
-12.25	3.39759	1.6378e-19
-12.25	3.42169	9.45635e-20
-12.25	3.44578	5.44212e-20
-12.25	3.46988	3.12174e-20
-12.25	3.49398	1.78489e-20
-12.25	3.51807	1.01722e-20
-12.25	3.54217	5.77847e-21
-12.25	3.56627	3.27196e-21
-12.25	3.59036	1.84674e-21
-12.25	3.61446	1.03899e-21
-12.25	3.63855	5.8268e-22
-12.25	3.66265	3.25738e-22
-12.25	3.68675	1.81524e-22
-12.25	3.71084	1.00841e-22
-12.25	3.73494	5.58444e-23
-12.25	3.75904	3.08302e-23
-12.25	3.78313	1.69682e-23
-12.25	3.80723	9.31041e-24
-12.25	3.83133	5.09314e-24
-12.25	3.85542	2.77779e-24
-12.25	3.87952	1.5105e-24
-12.25	3.90361	8.18965e-25
-12.25	3.92771	4.42736e-25
-12.25	3.95181	2.38657e-25
-12.25	3.9759	1.28283e-25
-12.25	4	6.8761e-26
-12.25	4.0241	3.67544e-26
-12.25	4.04819	1.95923e-26
-12.25	4.07229	1.04156e-26
-12.25	4.09639	5.52236e-27
-12.25	4.12048	2.92022e-27
-12.25	4.14458	1.54019e-27
-12.25	4.16868	8.10231e-28
-12.25	4.19277	4.25142e-28
-12.25	4.21687	2.22516e-28
-12.25	4.24096	1.1617e-28
-12.25	4.26506	6.04989e-29
-12.25	4.28916	3.14283e-29
-12.25	4.31325	1.62863e-29
-12.25	4.33735	8.4188e-30
-12.25	4.36145	4.34117e-30
-12.25	4.38554	2.23301e-30
-12.25	4.40964	1.14577e-30
-12.25	4.43374	5.86438e-31
-12.25	4.45783	2.99403e-31
-12.25	4.48193	1.52472e-31
-12.25	4.50602	7.74491e-32
-12.25	4.53012	3.92392e-32
-12.25	4.55422	1.98284e-32
-12.25	4.57831	9.99328e-33
-12.25	4.60241	5.023e-33
-12.25	4.62651	2.5179e-33
-12.25	4.6506	1.25869e-33
-12.25	4.6747	6.27456e-34
-12.25	4.6988	3.11903e-34
-12.25	4.72289	1.546e-34
-12.25	4.74699	7.64075e-35
-12.25	4.77108	3.76516e-35
-12.25	4.79518	1.84984e-35
-12.25	4.81928	9.06101e-36
-12.25	4.84337	4.42478e-36
-12.25	4.86747	2.1541e-36
-12.25	4.89157	1.04541e-36
-12.25	4.91566	5.05757e-37
-12.25	4.93976	2.43903e-37
-12.25	4.96386	1.17247e-37
-12.25	4.98795	5.618e-38
-12.25	5.01205	2.68318e-38
-12.25	5.03615	1.27731e-38
-12.25	5.06024	6.06055e-39
-12.25	5.08434	2.86608e-39
-12.25	5.10843	1.35088e-39
-12.25	5.13253	6.34586e-40
-12.25	5.15663	2.97101e-40
-12.25	5.18072	1.38628e-40
-12.25	5.20482	6.44649e-41
-12.25	5.22892	2.98757e-41
-12.25	5.25301	1.37985e-41
-12.25	5.27711	6.35124e-42
-12.25	5.30121	2.91337e-42
-12.25	5.3253	1.33179e-42
-12.25	5.3494	6.06712e-43
-12.25	5.37349	2.7544e-43
-12.25	5.39759	1.24615e-43
-12.25	5.42169	5.61835e-44
-12.25	5.44578	2.5243e-44
-12.25	5.46988	1.13022e-44
-12.25	5.49398	5.04285e-45
-12.25	5.51807	2.24221e-45
-12.25	5.54217	9.93494e-46
-12.25	5.56627	4.38672e-46
-12.25	5.59036	1.93019e-46
-12.25	5.61446	8.46338e-47
-12.25	5.63855	3.69804e-47
-12.25	5.66265	1.61021e-47
-12.25	5.68675	6.98678e-48
-12.25	5.71084	3.02102e-48
-12.25	5.73494	1.30171e-48
-12.25	5.75904	5.58925e-49
-12.25	5.78313	2.39153e-49
-12.25	5.80723	1.01972e-49
-12.25	5.83133	4.33278e-50
-12.25	5.85542	1.83457e-50
-12.25	5.87952	7.7408e-51
-12.25	5.90361	3.25475e-51
-12.25	5.92771	1.36374e-51
-12.25	5.95181	5.69416e-52
-12.25	5.9759	2.36924e-52
-12.25	6	9.82364e-53
-12.2	0	0.000315533
-12.2	0.0241	0.00305
-12.2	0.04819	0.00816
-12.2	0.07229	0.01367
-12.2	0.09639	0.01846
-12.2	0.12048	0.02164
-12.2	0.14458	0.02269
-12.2	0.16868	0.02146
-12.2	0.19277	0.01822
-12.2	0.21687	0.01371
-12.2	0.24096	0.00938
-12.2	0.26506	0.00812
-12.2	0.28916	0.0108
-12.2	0.31325	0.01434
-12.2	0.33735	0.01699
-12.2	0.36145	0.01825
-12.2	0.38554	0.01815
-12.2	0.40964	0.01701
-12.2	0.43374	0.01535
-12.2	0.45783	0.0138
-12.2	0.48193	0.01291
-12.2	0.50602	0.01287
-12.2	0.53012	0.01348
-12.2	0.55422	0.01432
-12.2	0.57831	0.01506
-12.2	0.60241	0.01556
-12.2	0.62651	0.01577
-12.2	0.6506	0.0157
-12.2	0.6747	0.01541
-12.2	0.6988	0.01494
-12.2	0.72289	0.01431
-12.2	0.74699	0.01357
-12.2	0.77108	0.01273
-12.2	0.79518	0.01182
-12.2	0.81928	0.01087
-12.2	0.84337	0.00988
-12.2	0.86747	0.00889
-12.2	0.89157	0.00793
-12.2	0.91566	0.00699
-12.2	0.93976	0.00611
-12.2	0.96386	0.00529
-12.2	0.98795	0.00454
-12.2	1.01205	0.00386
-12.2	1.03615	0.00325
-12.2	1.06024	0.00272
-12.2	1.08434	0.00225
-12.2	1.10843	0.00185
-12.2	1.13253	0.0015
-12.2	1.15663	0.00121
-12.2	1.18072	0.00096889
-12.2	1.20482	0.000768713
-12.2	1.22892	0.000605063
-12.2	1.25301	0.000472606
-12.2	1.27711	0.000366433
-12.2	1.30121	0.000282123
-12.2	1.3253	0.000215776
-12.2	1.3494	0.000164014
-12.2	1.37349	0.000123962
-12.2	1.39759	9.3208e-05
-12.2	1.42169	6.97635e-05
-12.2	1.44578	5.20091e-05
-12.2	1.46988	3.86441e-05
-12.2	1.49398	2.86363e-05
-12.2	1.51807	2.11764e-05
-12.2	1.54217	1.56367e-05
-12.2	1.56627	1.1535e-05
-12.2	1.59036	8.50443e-06
-12.2	1.61446	6.26836e-06
-12.2	1.63855	4.61963e-06
-12.2	1.66265	3.40413e-06
-12.2	1.68675	2.50781e-06
-12.2	1.71084	1.84657e-06
-12.2	1.73494	1.35856e-06
-12.2	1.75904	9.98313e-07
-12.2	1.78313	7.32403e-07
-12.2	1.80723	5.36231e-07
-12.2	1.83133	3.91655e-07
-12.2	1.85542	2.85265e-07
-12.2	1.87952	2.07135e-07
-12.2	1.90361	1.499e-07
-12.2	1.92771	1.08092e-07
-12.2	1.95181	7.76518e-08
-12.2	1.9759	5.55671e-08
-12.2	2	3.96046e-08
-12.2	2.0241	2.81127e-08
-12.2	2.04819	1.98733e-08
-12.2	2.07229	1.39905e-08
-12.2	2.09639	9.8083e-09
-12.2	2.12048	6.84781e-09
-12.2	2.14458	4.7612e-09
-12.2	2.16868	3.29686e-09
-12.2	2.19277	2.27364e-09
-12.2	2.21687	1.56169e-09
-12.2	2.24096	1.06842e-09
-12.2	2.26506	7.28084e-10
-12.2	2.28916	4.94239e-10
-12.2	2.31325	3.34218e-10
-12.2	2.33735	2.25154e-10
-12.2	2.36145	1.51115e-10
-12.2	2.38554	1.0105e-10
-12.2	2.40964	6.73254e-11
-12.2	2.43374	4.4695e-11
-12.2	2.45783	2.95659e-11
-12.2	2.48193	1.94891e-11
-12.2	2.50602	1.28019e-11
-12.2	2.53012	8.3802e-12
-12.2	2.55422	5.46691e-12
-12.2	2.57831	3.55425e-12
-12.2	2.60241	2.30295e-12
-12.2	2.62651	1.48716e-12
-12.2	2.6506	9.57144e-13
-12.2	2.6747	6.13973e-13
-12.2	2.6988	3.92537e-13
-12.2	2.72289	2.50136e-13
-12.2	2.74699	1.58869e-13
-12.2	2.77108	1.00572e-13
-12.2	2.79518	6.34583e-14
-12.2	2.81928	3.99098e-14
-12.2	2.84337	2.5018e-14
-12.2	2.86747	1.56317e-14
-12.2	2.89157	9.73524e-15
-12.2	2.91566	6.04327e-15
-12.2	2.93976	3.73924e-15
-12.2	2.96386	2.30612e-15
-12.2	2.98795	1.41765e-15
-12.2	3.01205	8.68647e-16
-12.2	3.03615	5.30524e-16
-12.2	3.06024	3.22965e-16
-12.2	3.08434	1.95971e-16
-12.2	3.10843	1.18527e-16
-12.2	3.13253	7.14543e-17
-12.2	3.15663	4.29365e-17
-12.2	3.18072	2.57165e-17
-12.2	3.20482	1.53526e-17
-12.2	3.22892	9.13568e-18
-12.2	3.25301	5.41857e-18
-12.2	3.27711	3.20343e-18
-12.2	3.30121	1.8877e-18
-12.2	3.3253	1.10876e-18
-12.2	3.3494	6.49126e-19
-12.2	3.37349	3.78801e-19
-12.2	3.39759	2.20334e-19
-12.2	3.42169	1.27746e-19
-12.2	3.44578	7.3825e-20
-12.2	3.46988	4.25262e-20
-12.2	3.49398	2.44179e-20
-12.2	3.51807	1.39754e-20
-12.2	3.54217	7.97301e-21
-12.2	3.56627	4.5341e-21
-12.2	3.59036	2.57024e-21
-12.2	3.61446	1.45236e-21
-12.2	3.63855	8.18093e-22
-12.2	3.66265	4.59367e-22
-12.2	3.68675	2.57132e-22
-12.2	3.71084	1.43482e-22
-12.2	3.73494	7.98165e-23
-12.2	3.75904	4.4264e-23
-12.2	3.78313	2.44726e-23
-12.2	3.80723	1.34894e-23
-12.2	3.83133	7.4131e-24
-12.2	3.85542	4.06173e-24
-12.2	3.87952	2.21891e-24
-12.2	3.90361	1.20864e-24
-12.2	3.92771	6.56447e-25
-12.2	3.95181	3.55515e-25
-12.2	3.9759	1.91994e-25
-12.2	4	1.03396e-25
-12.2	4.0241	5.55292e-26
-12.2	4.04819	2.97408e-26
-12.2	4.07229	1.5886e-26
-12.2	4.09639	8.4629e-27
-12.2	4.12048	4.49658e-27
-12.2	4.14458	2.38296e-27
-12.2	4.16868	1.25961e-27
-12.2	4.19277	6.64122e-28
-12.2	4.21687	3.49274e-28
-12.2	4.24096	1.83232e-28
-12.2	4.26506	9.58863e-29
-12.2	4.28916	5.00542e-29
-12.2	4.31325	2.6065e-29
-12.2	4.33735	1.35397e-29
-12.2	4.36145	7.01615e-30
-12.2	4.38554	3.62678e-30
-12.2	4.40964	1.87015e-30
-12.2	4.43374	9.61962e-31
-12.2	4.45783	4.93582e-31
-12.2	4.48193	2.52622e-31
-12.2	4.50602	1.28969e-31
-12.2	4.53012	6.56736e-32
-12.2	4.55422	3.33559e-32
-12.2	4.57831	1.68974e-32
-12.2	4.60241	8.53718e-33
-12.2	4.62651	4.30174e-33
-12.2	4.6506	2.16168e-33
-12.2	4.6747	1.08328e-33
-12.2	4.6988	5.41349e-34
-12.2	4.72289	2.69763e-34
-12.2	4.74699	1.34041e-34
-12.2	4.77108	6.64099e-35
-12.2	4.79518	3.28056e-35
-12.2	4.81928	1.61573e-35
-12.2	4.84337	7.93376e-36
-12.2	4.86747	3.88388e-36
-12.2	4.89157	1.89546e-36
-12.2	4.91566	9.22174e-37
-12.2	4.93976	4.47248e-37
-12.2	4.96386	2.16226e-37
-12.2	4.98795	1.04203e-37
-12.2	5.01205	5.00563e-38
-12.2	5.03615	2.39679e-38
-12.2	5.06024	1.14389e-38
-12.2	5.08434	5.44147e-39
-12.2	5.10843	2.57997e-39
-12.2	5.13253	1.2192e-39
-12.2	5.15663	5.74234e-40
-12.2	5.18072	2.69557e-40
-12.2	5.20482	1.26112e-40
-12.2	5.22892	5.88025e-41
-12.2	5.25301	2.73256e-41
-12.2	5.27711	1.26552e-41
-12.2	5.30121	5.8411e-42
-12.2	5.3253	2.68682e-42
-12.2	5.3494	1.23169e-42
-12.2	5.37349	5.627e-43
-12.2	5.39759	2.56191e-43
-12.2	5.42169	1.16241e-43
-12.2	5.44578	5.2561e-44
-12.2	5.46988	2.36849e-44
-12.2	5.49398	1.06361e-44
-12.2	5.51807	4.75988e-45
-12.2	5.54217	2.1228e-45
-12.2	5.56627	9.43458e-46
-12.2	5.59036	4.17863e-46
-12.2	5.61446	1.84435e-46
-12.2	5.63855	8.11238e-47
-12.2	5.66265	3.55591e-47
-12.2	5.68675	1.55327e-47
-12.2	5.71084	6.76147e-48
-12.2	5.73494	2.93312e-48
-12.2	5.75904	1.26798e-48
-12.2	5.78313	5.46248e-49
-12.2	5.80723	2.3451e-49
-12.2	5.83133	1.0033e-49
-12.2	5.85542	4.2775e-50
-12.2	5.87952	1.81738e-50
-12.2	5.90361	7.69478e-51
-12.2	5.92771	3.24669e-51
-12.2	5.95181	1.36515e-51
-12.2	5.9759	5.72028e-52
-12.2	6	2.38863e-52
-12.15	0	0.000315534
-12.15	0.0241	0.00305
-12.15	0.04819	0.00816
-12.15	0.07229	0.01368
-12.15	0.09639	0.01846
-12.15	0.12048	0.02165
-12.15	0.14458	0.0227
-12.15	0.16868	0.02148
-12.15	0.19277	0.01824
-12.15	0.21687	0.01372
-12.15	0.24096	0.00939
-12.15	0.26506	0.00812
-12.15	0.28916	0.01082
-12.15	0.31325	0.01437
-12.15	0.33735	0.01704
-12.15	0.36145	0.01832
-12.15	0.38554	0.01822
-12.15	0.40964	0.01709
-12.15	0.43374	0.01543
-12.15	0.45783	0.01387
-12.15	0.48193	0.01297
-12.15	0.50602	0.01294
-12.15	0.53012	0.01357
-12.15	0.55422	0.01442
-12.15	0.57831	0.01519
-12.15	0.60241	0.01571
-12.15	0.62651	0.01593
-12.15	0.6506	0.01588
-12.15	0.6747	0.0156
-12.15	0.6988	0.01514
-12.15	0.72289	0.01452
-12.15	0.74699	0.01378
-12.15	0.77108	0.01295
-12.15	0.79518	0.01203
-12.15	0.81928	0.01107
-12.15	0.84337	0.01008
-12.15	0.86747	0.00909
-12.15	0.89157	0.00811
-12.15	0.91566	0.00716
-12.15	0.93976	0.00627
-12.15	0.96386	0.00544
-12.15	0.98795	0.00467
-12.15	1.01205	0.00398
-12.15	1.03615	0.00335
-12.15	1.06024	0.00281
-12.15	1.08434	0.00233
-12.15	1.10843	0.00191
-12.15	1.13253	0.00156
-12.15	1.15663	0.00126
-12.15	1.18072	0.00101
-12.15	1.20482	0.000801172
-12.15	1.22892	0.000631629
-12.15	1.25301	0.000494158
-12.15	1.27711	0.000383768
-12.15	1.30121	0.000295953
-12.15	1.3253	0.000226725
-12.15	1.3494	0.000172619
-12.15	1.37349	0.000130679
-12.15	1.39759	9.84192e-05
-12.15	1.42169	7.37839e-05
-12.15	1.44578	5.50955e-05
-12.15	1.46988	4.10036e-05
-12.15	1.49398	3.04338e-05
-12.15	1.51807	2.25422e-05
-12.15	1.54217	1.66724e-05
-12.15	1.56627	1.23193e-05
-12.15	1.59036	9.09794e-06
-12.15	1.61446	6.71737e-06
-12.15	1.63855	4.95931e-06
-12.15	1.66265	3.66112e-06
-12.15	1.68675	2.70224e-06
-12.15	1.71084	1.99364e-06
-12.15	1.73494	1.46974e-06
-12.15	1.75904	1.08228e-06
-12.15	1.78313	7.95721e-07
-12.15	1.80723	5.83885e-07
-12.15	1.83133	4.27432e-07
-12.15	1.85542	3.1205e-07
-12.15	1.87952	2.27122e-07
-12.15	1.90361	1.64761e-07
-12.15	1.92771	1.191e-07
-12.15	1.95181	8.57732e-08
-12.15	1.9759	6.15334e-08
-12.15	2	4.39688e-08
-12.15	2.0241	3.1291e-08
-12.15	2.04819	2.21776e-08
-12.15	2.07229	1.56537e-08
-12.15	2.09639	1.10033e-08
-12.15	2.12048	7.70266e-09
-12.15	2.14458	5.36998e-09
-12.15	2.16868	3.7285e-09
-12.15	2.19277	2.57834e-09
-12.15	2.21687	1.77586e-09
-12.15	2.24096	1.21832e-09
-12.15	2.26506	8.32561e-10
-12.15	2.28916	5.66756e-10
-12.15	2.31325	3.84346e-10
-12.15	2.33735	2.59666e-10
-12.15	2.36145	1.74782e-10
-12.15	2.38554	1.17216e-10
-12.15	2.40964	7.83262e-11
-12.15	2.43374	5.21521e-11
-12.15	2.45783	3.46018e-11
-12.15	2.48193	2.28774e-11
-12.15	2.50602	1.50732e-11
-12.15	2.53012	9.89724e-12
-12.15	2.55422	6.47651e-12
-12.15	2.57831	4.22376e-12
-12.15	2.60241	2.74535e-12
-12.15	2.62651	1.77847e-12
-12.15	2.6506	1.14829e-12
-12.15	2.6747	7.38965e-13
-12.15	2.6988	4.73987e-13
-12.15	2.72289	3.03029e-13
-12.15	2.74699	1.93101e-13
-12.15	2.77108	1.2265e-13
-12.15	2.79518	7.76499e-14
-12.15	2.81928	4.9001e-14
-12.15	2.84337	3.08222e-14
-12.15	2.86747	1.93249e-14
-12.15	2.89157	1.20772e-14
-12.15	2.91566	7.52343e-15
-12.15	2.93976	4.67158e-15
-12.15	2.96386	2.89143e-15
-12.15	2.98795	1.78386e-15
-12.15	3.01205	1.09701e-15
-12.15	3.03615	6.7245e-16
-12.15	3.06024	4.10876e-16
-12.15	3.08434	2.50243e-16
-12.15	3.10843	1.51919e-16
-12.15	3.13253	9.19313e-17
-12.15	3.15663	5.54517e-17
-12.15	3.18072	3.33399e-17
-12.15	3.20482	1.99809e-17
-12.15	3.22892	1.19361e-17
-12.15	3.25301	7.10741e-18
-12.15	3.27711	4.21851e-18
-12.15	3.30121	2.49578e-18
-12.15	3.3253	1.47181e-18
-12.15	3.3494	8.65168e-19
-12.15	3.37349	5.06932e-19
-12.15	3.39759	2.96075e-19
-12.15	3.42169	1.72369e-19
-12.15	3.44578	1.00028e-19
-12.15	3.46988	5.78619e-20
-12.15	3.49398	3.33638e-20
-12.15	3.51807	1.91766e-20
-12.15	3.54217	1.09871e-20
-12.15	3.56627	6.27508e-21
-12.15	3.59036	3.57256e-21
-12.15	3.61446	2.02755e-21
-12.15	3.63855	1.14709e-21
-12.15	3.66265	6.46945e-22
-12.15	3.68675	3.63735e-22
-12.15	3.71084	2.03873e-22
-12.15	3.73494	1.1392e-22
-12.15	3.75904	6.34614e-23
-12.15	3.78313	3.52455e-23
-12.15	3.80723	1.95159e-23
-12.15	3.83133	1.0774e-23
-12.15	3.85542	5.93032e-24
-12.15	3.87952	3.25466e-24
-12.15	3.90361	1.78103e-24
-12.15	3.92771	9.71825e-25
-12.15	3.95181	5.28773e-25
-12.15	3.9759	2.86899e-25
-12.15	4	1.55232e-25
-12.15	4.0241	8.37606e-26
-12.15	4.04819	4.50734e-26
-12.15	4.07229	2.419e-26
-12.15	4.09639	1.29479e-26
-12.15	4.12048	6.91241e-27
-12.15	4.14458	3.68073e-27
-12.15	4.16868	1.95492e-27
-12.15	4.19277	1.03567e-27
-12.15	4.21687	5.47304e-28
-12.15	4.24096	2.88505e-28
-12.15	4.26506	1.51708e-28
-12.15	4.28916	7.95786e-29
-12.15	4.31325	4.16412e-29
-12.15	4.33735	2.17367e-29
-12.15	4.36145	1.13189e-29
-12.15	4.38554	5.87978e-30
-12.15	4.40964	3.04689e-30
-12.15	4.43374	1.57503e-30
-12.15	4.45783	8.12173e-31
-12.15	4.48193	4.17764e-31
-12.15	4.50602	2.14352e-31
-12.15	4.53012	1.09704e-31
-12.15	4.55422	5.6003e-32
-12.15	4.57831	2.85151e-32
-12.15	4.60241	1.44811e-32
-12.15	4.62651	7.33459e-33
-12.15	4.6506	3.70495e-33
-12.15	4.6747	1.86641e-33
-12.15	4.6988	9.37629e-34
-12.15	4.72289	4.69721e-34
-12.15	4.74699	2.34648e-34
-12.15	4.77108	1.16882e-34
-12.15	4.79518	5.80516e-35
-12.15	4.81928	2.87477e-35
-12.15	4.84337	1.41938e-35
-12.15	4.86747	6.9869e-36
-12.15	4.89157	3.42886e-36
-12.15	4.91566	1.67757e-36
-12.15	4.93976	8.18211e-37
-12.15	4.96386	3.97823e-37
-12.15	4.98795	1.92817e-37
-12.15	5.01205	9.31576e-38
-12.15	5.03615	4.48644e-38
-12.15	5.06024	2.1537e-38
-12.15	5.08434	1.03053e-38
-12.15	5.10843	4.91493e-39
-12.15	5.13253	2.33642e-39
-12.15	5.15663	1.10702e-39
-12.15	5.18072	5.22781e-40
-12.15	5.20482	2.46061e-40
-12.15	5.22892	1.1543e-40
-12.15	5.25301	5.39682e-41
-12.15	5.27711	2.51479e-41
-12.15	5.30121	1.16789e-41
-12.15	5.3253	5.40552e-42
-12.15	5.3494	2.49347e-42
-12.15	5.37349	1.1463e-42
-12.15	5.39759	5.25192e-43
-12.15	5.42169	2.39806e-43
-12.15	5.44578	1.09125e-43
-12.15	5.46988	4.94885e-44
-12.15	5.49398	2.23667e-44
-12.15	5.51807	1.00743e-44
-12.15	5.54217	4.52212e-45
-12.15	5.56627	2.02293e-45
-12.15	5.59036	9.01845e-46
-12.15	5.61446	4.00676e-46
-12.15	5.63855	1.77404e-46
-12.15	5.66265	7.8279e-47
-12.15	5.68675	3.44219e-47
-12.15	5.71084	1.50845e-47
-12.15	5.73494	6.58774e-48
-12.15	5.75904	2.86714e-48
-12.15	5.78313	1.24357e-48
-12.15	5.80723	5.37523e-49
-12.15	5.83133	2.31543e-49
-12.15	5.85542	9.93969e-50
-12.15	5.87952	4.25228e-50
-12.15	5.90361	1.81292e-50
-12.15	5.92771	7.70266e-51
-12.15	5.95181	3.26146e-51
-12.15	5.9759	1.37623e-51
-12.15	6	5.78731e-52
-12.1	0	0.000315535
-12.1	0.0241	0.00305
-12.1	0.04819	0.00816
-12.1	0.07229	0.01368
-12.1	0.09639	0.01847
-12.1	0.12048	0.02166
-12.1	0.14458	0.02272
-12.1	0.16868	0.0215
-12.1	0.19277	0.01826
-12.1	0.21687	0.01374
-12.1	0.24096	0.0094
-12.1	0.26506	0.00812
-12.1	0.28916	0.01083
-12.1	0.31325	0.01441
-12.1	0.33735	0.01709
-12.1	0.36145	0.01839
-12.1	0.38554	0.0183
-12.1	0.40964	0.01717
-12.1	0.43374	0.0155
-12.1	0.45783	0.01394
-12.1	0.48193	0.01304
-12.1	0.50602	0.01301
-12.1	0.53012	0.01365
-12.1	0.55422	0.01453
-12.1	0.57831	0.01532
-12.1	0.60241	0.01586
-12.1	0.62651	0.0161
-12.1	0.6506	0.01606
-12.1	0.6747	0.01579
-12.1	0.6988	0.01534
-12.1	0.72289	0.01473
-12.1	0.74699	0.01399
-12.1	0.77108	0.01316
-12.1	0.79518	0.01225
-12.1	0.81928	0.01128
-12.1	0.84337	0.01028
-12.1	0.86747	0.00928
-12.1	0.89157	0.00829
-12.1	0.91566	0.00733
-12.1	0.93976	0.00643
-12.1	0.96386	0.00558
-12.1	0.98795	0.0048
-12.1	1.01205	0.00409
-12.1	1.03615	0.00346
-12.1	1.06024	0.0029
-12.1	1.08434	0.00241
-12.1	1.10843	0.00198
-12.1	1.13253	0.00162
-12.1	1.15663	0.00131
-12.1	1.18072	0.00105
-12.1	1.20482	0.000834889
-12.1	1.22892	0.000659269
-12.1	1.25301	0.000516617
-12.1	1.27711	0.000401863
-12.1	1.30121	0.000310413
-12.1	1.3253	0.000238191
-12.1	1.3494	0.000181646
-12.1	1.37349	0.000137737
-12.1	1.39759	0.000103904
-12.1	1.42169	7.80217e-05
-12.1	1.44578	5.83541e-05
-12.1	1.46988	4.34986e-05
-12.1	1.49398	3.23377e-05
-12.1	1.51807	2.3991e-05
-12.1	1.54217	1.77727e-05
-12.1	1.56627	1.31539e-05
-12.1	1.59036	9.73054e-06
-12.1	1.61446	7.19673e-06
-12.1	1.63855	5.32256e-06
-12.1	1.66265	3.93643e-06
-12.1	1.68675	2.91091e-06
-12.1	1.71084	2.15178e-06
-12.1	1.73494	1.58953e-06
-12.1	1.75904	1.17293e-06
-12.1	1.78313	8.64227e-07
-12.1	1.80723	6.35558e-07
-12.1	1.83133	4.66316e-07
-12.1	1.85542	3.41228e-07
-12.1	1.87952	2.48947e-07
-12.1	1.90361	1.81029e-07
-12.1	1.92771	1.3118e-07
-12.1	1.95181	9.47069e-08
-12.1	1.9759	6.81131e-08
-12.1	2	4.8794e-08
-12.1	2.0241	3.48141e-08
-12.1	2.04819	2.47385e-08
-12.1	2.07229	1.7507e-08
-12.1	2.09639	1.23385e-08
-12.1	2.12048	8.66032e-09
-12.1	2.14458	6.05383e-09
-12.1	2.16868	4.21468e-09
-12.1	2.19277	2.92249e-09
-12.1	2.21687	2.01843e-09
-12.1	2.24096	1.38856e-09
-12.1	2.26506	9.51549e-10
-12.1	2.28916	6.49577e-10
-12.1	2.31325	4.41759e-10
-12.1	2.33735	2.99308e-10
-12.1	2.36145	2.02046e-10
-12.1	2.38554	1.35894e-10
-12.1	2.40964	9.10724e-11
-12.1	2.43374	6.08178e-11
-12.1	2.45783	4.04715e-11
-12.1	2.48193	2.68384e-11
-12.1	2.50602	1.77366e-11
-12.1	2.53012	1.16816e-11
-12.1	2.55422	7.66765e-12
-12.1	2.57831	5.0161e-12
-12.1	2.60241	3.27057e-12
-12.1	2.62651	2.1254e-12
-12.1	2.6506	1.37667e-12
-12.1	2.6747	8.88777e-13
-12.1	2.6988	5.71926e-13
-12.1	2.72289	3.66839e-13
-12.1	2.74699	2.34534e-13
-12.1	2.77108	1.49462e-13
-12.1	2.79518	9.49421e-14
-12.1	2.81928	6.0116e-14
-12.1	2.84337	3.79426e-14
-12.1	2.86747	2.38711e-14
-12.1	2.89157	1.49702e-14
-12.1	2.91566	9.35824e-15
-12.1	2.93976	5.8314e-15
-12.1	2.96386	3.62213e-15
-12.1	2.98795	2.24268e-15
-12.1	3.01205	1.38416e-15
-12.1	3.03615	8.51563e-16
-12.1	3.06024	5.22229e-16
-12.1	3.08434	3.19241e-16
-12.1	3.10843	1.94532e-16
-12.1	3.13253	1.18161e-16
-12.1	3.15663	7.15436e-17
-12.1	3.18072	4.31797e-17
-12.1	3.20482	2.59777e-17
-12.1	3.22892	1.55788e-17
-12.1	3.25301	9.31278e-18
-12.1	3.27711	5.54928e-18
-12.1	3.30121	3.29614e-18
-12.1	3.3253	1.95159e-18
-12.1	3.3494	1.15182e-18
-12.1	3.37349	6.77633e-19
-12.1	3.39759	3.97393e-19
-12.1	3.42169	2.32307e-19
-12.1	3.44578	1.3537e-19
-12.1	3.46988	7.8633e-20
-12.1	3.49398	4.55312e-20
-12.1	3.51807	2.62809e-20
-12.1	3.54217	1.51217e-20
-12.1	3.56627	8.67348e-21
-12.1	3.59036	4.95934e-21
-12.1	3.61446	2.82681e-21
-12.1	3.63855	1.60626e-21
-12.1	3.66265	9.09891e-22
-12.1	3.68675	5.13834e-22
-12.1	3.71084	2.89283e-22
-12.1	3.73494	1.62367e-22
-12.1	3.75904	9.0856e-23
-12.1	3.78313	5.06877e-23
-12.1	3.80723	2.81938e-23
-12.1	3.83133	1.56356e-23
-12.1	3.85542	8.64571e-24
-12.1	3.87952	4.76672e-24
-12.1	3.90361	2.62051e-24
-12.1	3.92771	1.43651e-24
-12.1	3.95181	7.85247e-25
-12.1	3.9759	4.28044e-25
-12.1	4	2.32686e-25
-12.1	4.0241	1.26143e-25
-12.1	4.04819	6.82003e-26
-12.1	4.07229	3.67747e-26
-12.1	4.09639	1.97774e-26
-12.1	4.12048	1.06085e-26
-12.1	4.14458	5.67577e-27
-12.1	4.16868	3.02893e-27
-12.1	4.19277	1.61235e-27
-12.1	4.21687	8.56139e-28
-12.1	4.24096	4.53477e-28
-12.1	4.26506	2.39608e-28
-12.1	4.28916	1.26295e-28
-12.1	4.31325	6.64076e-29
-12.1	4.33735	3.48336e-29
-12.1	4.36145	1.82276e-29
-12.1	4.38554	9.51501e-30
-12.1	4.40964	4.95494e-30
-12.1	4.43374	2.57402e-30
-12.1	4.45783	1.3339e-30
-12.1	4.48193	6.89556e-31
-12.1	4.50602	3.5558e-31
-12.1	4.53012	1.82902e-31
-12.1	4.55422	9.38431e-32
-12.1	4.57831	4.80258e-32
-12.1	4.60241	2.45145e-32
-12.1	4.62651	1.24805e-32
-12.1	4.6506	6.33709e-33
-12.1	4.6747	3.20906e-33
-12.1	4.6988	1.62062e-33
-12.1	4.72289	8.16177e-34
-12.1	4.74699	4.09894e-34
-12.1	4.77108	2.0527e-34
-12.1	4.79518	1.02502e-34
-12.1	4.81928	5.10363e-35
-12.1	4.84337	2.53365e-35
-12.1	4.86747	1.25408e-35
-12.1	4.89157	6.18863e-36
-12.1	4.91566	3.04472e-36
-12.1	4.93976	1.49337e-36
-12.1	4.96386	7.30208e-37
-12.1	4.98795	3.55935e-37
-12.1	5.01205	1.72953e-37
-12.1	5.03615	8.37747e-38
-12.1	5.06024	4.04494e-38
-12.1	5.08434	1.94679e-38
-12.1	5.10843	9.3395e-39
-12.1	5.13253	4.46601e-39
-12.1	5.15663	2.12863e-39
-12.1	5.18072	1.01125e-39
-12.1	5.20482	4.78837e-40
-12.1	5.22892	2.25987e-40
-12.1	5.25301	1.06302e-40
-12.1	5.27711	4.98372e-41
-12.1	5.30121	2.32873e-41
-12.1	5.3253	1.08451e-41
-12.1	5.3494	5.03376e-42
-12.1	5.37349	2.32859e-42
-12.1	5.39759	1.07358e-42
-12.1	5.42169	4.93298e-43
-12.1	5.44578	2.25902e-43
-12.1	5.46988	1.03101e-43
-12.1	5.49398	4.68958e-44
-12.1	5.51807	2.12586e-44
-12.1	5.54217	9.60423e-45
-12.1	5.56627	4.3243e-45
-12.1	5.59036	1.94041e-45
-12.1	5.61446	8.67753e-46
-12.1	5.63855	3.86741e-46
-12.1	5.66265	1.71778e-46
-12.1	5.68675	7.60388e-47
-12.1	5.71084	3.35448e-47
-12.1	5.73494	1.4748e-47
-12.1	5.75904	6.46196e-48
-12.1	5.78313	2.82173e-48
-12.1	5.80723	1.22796e-48
-12.1	5.83133	5.32567e-49
-12.1	5.85542	2.30189e-49
-12.1	5.87952	9.91547e-50
-12.1	5.90361	4.25659e-50
-12.1	5.92771	1.82109e-50
-12.1	5.95181	7.76461e-51
-12.1	5.9759	3.29935e-51
[truncated: 185,001 more rows]

[truncated: 65 more sheets: Figure 2a, Figure 2b, Figure 2c, Figure 2d, Figure 3a, Figure 3b, Figure 3c, Figure 3d, Figure 4a, Figure 4b, Figure 4c, Figure 4e, Figure 4f, Figure 5a, Figure 5b, Figure 5d, Figure 5e, Figure S1, Figure S2, Figure S3 …]
